# Supplementary material for: Disarming the alkoxide trap to access a practical FeCl3 system for borrowing-hydrogen N-alkylation
Source: Royal Society of Chemistry journal article supplement (doi:10.1039/d2qo00825d), 2022-01-01
Supplement: d2qo00825d1.pdf [file d2qo00825d1.pdf]

Electronic Supplementary Material (ESI) for Chemical Science.

This journal is © The Royal Society of Chemistry 2022

## Disarming the Alkoxide Trap to Access a Practical FeCl<sub>3</sub> System for Borrowing Hydrogen *N*-alkylation

Zongren Ye,<sup>a</sup> Zhenjie Yang,<sup>a</sup> Chenhui Yang,<sup>a</sup> Ming Huang,<sup>ab</sup> Xianfang Xu,<sup>a</sup> and Zhuofeng Ke<sup>\*ac</sup>

<sup>a</sup>School of Materials Science & Engineering, School of Chemistry, PCFM Lab, Sun Yat-sen University, Guangzhou 510006, P. R. China.

<sup>b</sup>School of Clinical Pharmacy, Guangdong Pharmaceutical University, Guangzhou 510006, P. R. China.

<sup>c</sup>Guangdong Provincial Key Laboratory of Optical Chemicals, XinHuaYue Group, Maoming, 525000, P.R. China.

\*Author to whom correspondence should be addressed at: kezhf3@mail.sysu.edu.cn

### Table of contents

|                                                                                                     |    |
|-----------------------------------------------------------------------------------------------------|----|
| 1. General Information.                                                                             | 2  |
| 2. GC Analysis Method for the Condition Optimization and Control Experiments.                       | 2  |
| 3. Syntheses and Characterization of Substrates, Ligands, and Catalysts.                            | 2  |
| 4. Optimization of Reaction Conditions.                                                             | 6  |
| 5. General Procedure for the <i>in-situ</i> Catalytic <i>N</i> -alkylation of Amines with Alcohols. | 8  |
| 6. Analytical Data of <i>N</i> -alkylated Anilines.                                                 | 8  |
| 7. <i>N</i> -methylation of Aniline with Methanol.                                                  | 14 |
| 8. <i>N</i> -alkylation of Amines with Different amount of Alcohols and Base                        | 15 |
| 9. Detection of the Reduction of Iron(III).                                                         | 15 |
| 10. X-ray Photoelectron Spectrum                                                                    | 19 |
| 11. Characterization for Metal Hydride.                                                             | 19 |
| 12. Deuterium Labeling Experiments.                                                                 | 20 |
| 13. Monitoring the Kinetics of the Reaction.                                                        | 21 |
| 14. DFT Calculations.                                                                               | 23 |
| 15. NMR spectra of products 4.                                                                      | 25 |
| 16. The Cartesian Coordinates (xyz) for all Optimized Structures in Gas are Presented.              | 42 |
| 17. References                                                                                      | 95 |

## 1. General Information.

Unless otherwise noted, all manipulations were performed under a dry nitrogen atmosphere using Schlenk-line techniques or under a nitrogen atmosphere in the glovebox. All reagents obtained from commercially available sources were used without further purification unless otherwise stated. THF, diethyl ether, and toluene were obtained from commercial sources and were purified according to standard procedures. Reaction temperatures refer to external bath temperatures. TLC was performed on silica gel GF254 (layer thickness 0.20-0.25 mm) and components were located by observation under UV light. Column chromatography was performed on silica gel (300-400 mesh) using 10% ethyl acetate/hexane as eluent. NMR spectra were performed at room temperature on a Bruker Avance 400 spectrometer using the residual solvent signal as the internal standard [CDCl<sub>3</sub>: 7.29 ppm (<sup>1</sup>H), 77.00 ppm (<sup>13</sup>C). DMSO-*d*<sub>6</sub>: 2.50 ppm (<sup>1</sup>H), 39.52 ppm (<sup>13</sup>C)]R. GC analyses were recorded in a Shimadzu GC-2014C device equipped with a Wondacap 1 column. High-resolution mass spectra of compounds were recorded on LTQ Orbitrap Elite LC/MS (ESI) at the analytical center of Sun Yat-Sen University. UV-Vis spectroscopy data were obtained by use of a Hitachi U3500 at room temperature.

## 2. GC Analysis Method for the Condition Optimization and Control Experiments.

GC analysis method:

Injector: Mode: Split; temp.: 330 °C; Gas: N<sub>2</sub> Pressure: 1.34 bar; Split ratio: 39:1; Split flow: 67.6 mL/min. Column: Wondacap 1 column Capillary column (30 m × 0.25 mm); Nominal film thickness: 0.250 μm; Temperature program: Initial temperature 100 °C, heat to 120 °C with 5 °C/min, then heat to 200 °C with 50 °C/min, hold for 5 min. Initial Flow: 1.62 mL/min; Average velocity: 39.4 cm/sec, Pressure: 1.34 bar. Detector (FID): Temp.: 330 °C; Hydrogen flow: 40.0 mL/min; Air flow: 400.0 mL/min.

Preparation of GC sample:

Dilute the crude reaction mixture with 10 mL of EtOAc and 21.0 mg (0.1 mmol) of 1,3,5-trimethoxybenzene was added as standard, filtered through the syringe filter, and collected in GC vials for analysis.

Retention times: Benzaldehyde: 2.79 min; Aniline: 2.83 min; Benzyl alcohol: 3.33 min; *N*-methylaniline: 3.62 min;

1,3,5-trimethoxybenzene: 6.55 min; *N*-1-diphenylmethanimine: 8.66 min; *N,N*-benzylphenylamine: 9.05 min.

## 3. Syntheses and Characterization of Substrates, Ligands, and Catalysts.

**Scheme S1. Synthesis of the vitamin E, (±)- $\alpha$ -tocopherol, a derivative of 4-bromobenzyl alcohol (2q)<sup>1</sup>**

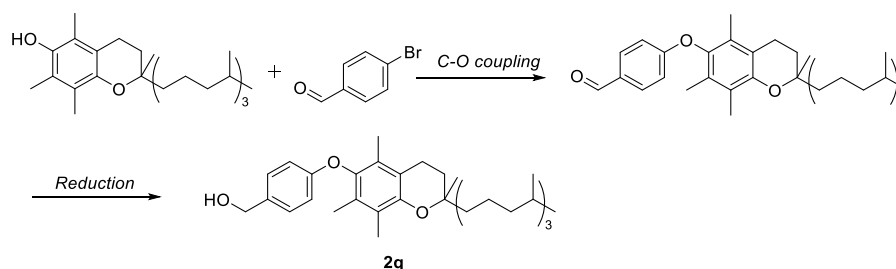

**(4-((R)-2,5,7,8-Tetramethyl-2-((4R,8R)-4,8,12-trimethyltridecyl)chroman-6-yloxy) phenyl )methanol.**<sup>1</sup> 4-Bromobenzaldehyde (4 mmol, 740 mg), Pd(OAc)<sub>2</sub> (4 mol%, 0.16 mmol, 36 mg), JhonPhos (6 mol%, 0.24 mmol, 70 mg), K<sub>3</sub>PO<sub>4</sub> (2.17 equiv, 8.67 mmol, 1.84 g) were taken in an oven-dried Schlenk reaction tube, charged with magnetic stir bar. Then the reaction tube was evacuated and back filled with nitrogen. This vacuum/ nitrogen sequence was repeated four times, (R)-2,5,7,8-tetramethyl-2-((4R,8R)-4,8,12-trimethyltridecyl)chroman-6-ol (vitamin E) (4 mmol, 1.72 g), Toluene (4 mL) were added under the positive pressure of nitrogen and the resealed tube

was immersed in a preheated oil bath at 120 °C and stirred vigorously for 24 hours. The reaction mixture was cooled to room temperature, diluted with 10 mL ethyl acetate, and filtered through celite using additional 20 mL ethyl acetate. The filtrate was concentrated and purified by column chromatography eluting with pet ether - ethyl acetate mixture (99:1 v/v) to give the product aldehyde. The aldehyde was taken in a clean round bottom flask, charged with a magnetic stir bar. Ethanol was added to dissolve the aldehyde and placed on a magnetic stirrer. NaBH<sub>4</sub> (1.5 equiv) was added to this solution in portion-wise with constant stirring at room temperature. The reaction mixture was stirred at room temperature for complete conversion (checking by TLC). The remaining ethanol was removed in rota-vap. Then water was added to this reaction mixture and the organic part was extracted by diethyl ether and dried over anhydrous Na<sub>2</sub>SO<sub>4</sub>. Organic part was concentrated and brown coloured liquid(4-((R)-2,5,7,8-tetramethyl-2-((4R,8R)-4,8,12-trimethyltridecyl)chroman-6-yloxy) phenyl)methanol was isolated through silica gel, eluted with pet ether - ethyl acetate mixture (8:1 v/v). <sup>1</sup>H NMR (400 MHz, CDCl<sub>3</sub>) δ 7.30 - 7.22 (m, 2H), 6.82 - 6.72 (m, 2H), 4.60 (s, 2H), 2.66 (t, *J* = 6.5 Hz, 2H), 2.18 (s, 3H), 2.06 (s, 3H), 2.02 (s, 3H), 1.88 (ddq, *J* = 19.8, 13.2, 6.7 Hz, 2H), 1.70 - 1.53 (m, 4H), 1.53 - 1.41 (m, 4H), 1.41 - 1.27 (m, 10H), 1.25 - 1.12 (m, 6H), 0.93 (t, *J* = 6.5 Hz, 12H); HRMS (ESI<sup>+</sup>, MeOH) [M + Na]<sup>+</sup> 559.41228.

#### Scheme S2. Synthesis of the Imidazolium Salts L1–L4

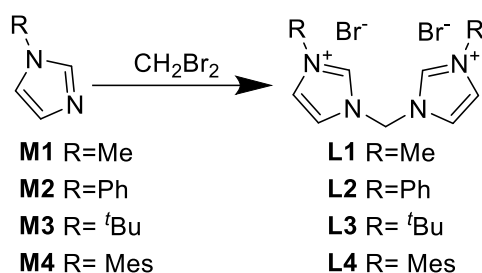

#### General Method for the Preparation of Imidazolium Salts L1-L4.<sup>2,3</sup>

To a solution of the *N*-substituted imidazole (20 mmol) in 5 mL of THF in a sealed tube (15 mL) was added dibromomethane (10 mmol). The mixture is stirred at 130 °C for 2-3 days, and the solid that precipitates is filtered and washed repeatedly with an excess amount of THF and CH<sub>2</sub>Cl<sub>2</sub>. The white solid was dried in vacuo, and **L1-L4** are obtained.

#### Synthesis of 1,1-Bis(3-methylimidazolium-1-yl)methane dibromide (L1)<sup>2</sup>

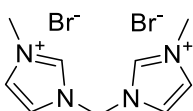

Following the general method (2 days) using 1-methylimidazole (1.59 mL, 20 mmol) and dibromomethane (0.7 mL, 10 mmol) in 5 mL of THF, gave **L1** as a white solid. Yield: 2.84 g (8.40 mmol, 85%). <sup>1</sup>H NMR (400 MHz, DMSO-*d*<sub>6</sub>) δ 9.58 (s, 2H), 8.11 (t, *J* = 1.8 Hz, 2H), 7.83 (t, *J* = 1.7 Hz, 2H), 6.79 (s, 2H), 3.91 (s, 6H); <sup>13</sup>C NMR (101 MHz, DMSO-*d*<sub>6</sub>) δ 138.01, 124.26, 121.89, 57.79, 36.24; MS (ESI<sup>+</sup>, MeOH) [(M - 2Br)]<sup>2+</sup> 88.95.

#### Synthesis of 1,1-Bis(3-phenylimidazolium-1-yl)methane dibromide (L2)<sup>2</sup>

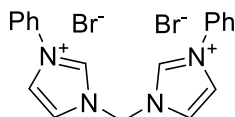

Following the general method (2 days) using 1-phenylimidazole (2.88 g, 20 mmol) and dibromomethane (0.7 mL, 10mmol) in 5 mL of THF, gave **L2** as a white solid. Yield: 2.58 g (5.58 mmol, 56%). <sup>1</sup>H NMR (400 MHz, DMSO-*d*<sub>6</sub>) δ 10.47 (s, 2H), 8.48 (s, 4H), 7.85 (d, *J* = 7.8 Hz, 4H), 7.71 (t, *J* = 7.6 Hz, 4H), 7.63 (t, *J* = 7.3 Hz, 2H), 6.98 (s, 2H); <sup>13</sup>C NMR (101 MHz, DMSO-*d*<sub>6</sub>) δ 137.33, 134.45, 130.27, 130.18, 123.03, 121.92, 121.52, 58.31; MS (ESI<sup>+</sup>, MeOH) [(M - 2Br)]<sup>2+</sup> 150.95.

### Synthesis of 1,1-Bis(3-*tert*-butylimidazolium-1-yl)methane dibromide (**L3**)<sup>3</sup>

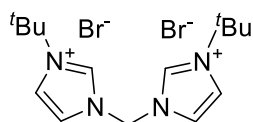

Following the general method (3 days) using 1-*tert*-butylimidazole (2.48 g, 20 mmol) and dibromomethane (0.7 mL, 10 mmol) in 5 mL of THF, gave **L3** as a white solid. Yield: 2.65 g (6.28 mmol, 63%). <sup>1</sup>H NMR (400 MHz, DMSO-*d*<sub>6</sub>)  $\delta$  9.87 (s, 2 H), 8.24 (s, 2 H), 8.18 (s, 2 H), 6.69 (s, 2 H), 1.63 (s, 18 H); MS (ESI<sup>+</sup>, MeOH) [(M - 2Br)]<sup>2+</sup> 130.99.

### Synthesis of 1,1-Bis(3-mesitylimidazolium-1-yl)methane dibromide (**L4**)<sup>3</sup>

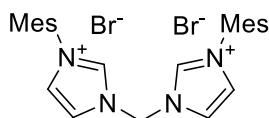

Following the general method (3 days) using 1-mesitylimidazole (3.73 g, 20 mmol) and dibromomethane (0.7 mL, 10 mmol) in 5 mL of THF, gave **L4** as a white solid. Yield: 3.74 g (6.85 mmol, 68%). <sup>1</sup>H NMR (400 MHz, DMSO-*d*<sub>6</sub>)  $\delta$  10.56 (s, 2 H), 8.96 (d, 2 H), 8.54 (d, 2 H), 7.61 (s, 4 H), 7.41 (s, 2 H), 3.79 (d, 6 H), 2.78 (s, 6 H), 2.49 (s, 6 H); MS (ESI<sup>+</sup>, MeOH) [(M - 2Br)]<sup>2+</sup> 193.01.

### Synthesis of {Fe[N(SiMe<sub>3</sub>)<sub>2</sub>]<sub>2</sub>}<sup>4</sup>

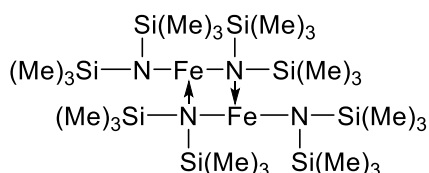

A flame-dried Schlenk-flask was charged with LiN(SiMe<sub>3</sub>)<sub>2</sub> (6.54 g, 2.2 equiv, 38.2 mmol) in diethyl ether (60 mL) in a glove box full of nitrogen. FeCl<sub>2</sub> (2.25 g, 1.0 equiv, 17.2 mmol) previously charged full of argon in a flame-dried Schlenk was added in portions at 0 °C. The resulting reaction mixture was allowed to warm to room temperature and stirred for 24 h. The Et<sub>2</sub>O was removed under vacuum, then the solid residue was suspended in *n*-hexane (25 mL) filtered over a glass frit, and washed with *n*-hexane (5 × 3 mL). After removing the solvent under reduced pressure, the crude product was purified by distillation under reduced pressure to obtain a dark green oil that crystallizes upon standing at room temperature. Yield: 2.20 g (2.92 mmol, 34%). <sup>1</sup>H NMR (400 MHz, C<sub>6</sub>D<sub>6</sub>)  $\delta$  64.71 (bs).

### Scheme S3. Synthesis of Cat. 1

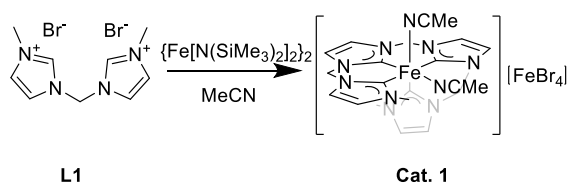

### Synthesis of tetracarbeno iron(II) complex (Cat.1)<sup>5</sup>

A suspension of the imidazolium salt **L1** (225.4 mg, 0.667 mmol) in MeCN (5 mL) was treated with {Fe[N(SiMe<sub>3</sub>)<sub>2</sub>]<sub>2</sub>} (314 mg, 0.417 mmol) and stirred overnight at room temperature. The precipitate was filtered off and washed with THF (2 mL) and Et<sub>2</sub>O (2 mL). The desired complex was obtained as a yellow powder (232.4 mg, 0.267 mmol, 40%) upon drying under vacuum. NMR measurements were hampered by the paramagnetic tetrabromoferrate(II), though the tetracarbeno complex itself is diamagnetic.<sup>5</sup> HRMS (ESI<sup>+</sup>, MeCN): [M - FeBr<sub>3</sub> - 2MeCN]<sup>+</sup> 487.0656, [L<sub>2</sub>Fe]<sup>2+</sup> 204.0736. Anal. Calcd for **Cat.1** (C<sub>22</sub>H<sub>30</sub>Br<sub>4</sub>Fe<sub>2</sub>N<sub>10</sub>): C, 30.52; H, 3.49; N, 16.18, Calcd for 1 **Cat.1** + 1.329 CH<sub>3</sub>CN: C, 32.18; H, 3.72; N, 17.24, Calcd for 1 **Cat.1** + 0.818 CH<sub>3</sub>CN + 0.187 HN(SiMe<sub>3</sub>)<sub>2</sub>: C, 31.99; H, 3.90; N, 16.58. Found: C, 32.14; H, 3.90; N, 16.53.



## 4. Optimization of Reaction Conditions.

Table S1. Optimization of Reaction Conditions for Amination of Benzyl Alcohol (2a) with Aniline (1a)<sup>a</sup>

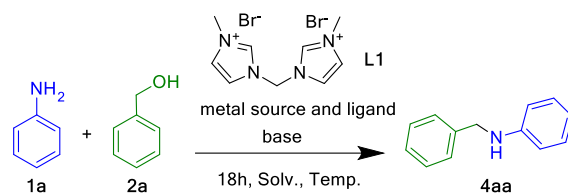

| Entry | T/°C (time) | Ligand      | metal source                                               | solvent | base                         | yeild <sup>b</sup> /% |
|-------|-------------|-------------|------------------------------------------------------------|---------|------------------------------|-----------------------|
| 1     | 80          | L1 7.2 mol% | Cr(CO) <sub>6</sub> 3.0 mol%                               | toluene | <sup>t</sup> BuOK 1.2 equiv  | <5                    |
| 2     | 110         | L1 7.2 mol% | MnCl <sub>2</sub> 1.5 mol% + Mn 1.5 mol%                   | toluene | <sup>t</sup> BuOK 1.2 equiv  | 42                    |
| 3     | 80          | L1 7.2 mol% | FeCl <sub>2</sub> 3.0 mol%                                 | toluene | <sup>t</sup> BuOK 1.2 equiv  | 65                    |
| 4     | 80          | L1 7.2 mol% | Co(NH <sub>3</sub> ) <sub>6</sub> Cl <sub>3</sub> 3.0 mol% | toluene | <sup>t</sup> BuOK 1.2 equiv  | 9                     |
| 5     | 80          | none        | none                                                       | toluene | <sup>t</sup> BuOK 1.2 equiv  | <5                    |
| 6     | 110         | L1 7.2 mol% | FeCl <sub>2</sub> 3.0 mol%                                 | toluene | <sup>t</sup> BuOK 1.2 equiv  | 84                    |
| 7     | 110         | L1 7.2 mol% | FeCl <sub>3</sub> 3.0 mol%                                 | toluene | <sup>t</sup> BuOK 1.2 equiv  | 92                    |
| 8     | 110         | L1 3.6 mol% | Fe(Cp) <sub>2</sub> 3.0 mol%                               | toluene | <sup>t</sup> BuOK 1.2 equiv  | 20                    |
| 9     | 110         | L1 3.6 mol% | FeCl <sub>3</sub> 3.0 mol%                                 | toluene | <sup>t</sup> BuOK 1.2 equiv  | 65                    |
| 10    | 110         | L1 3.6 mol% | FeCl <sub>3</sub> 3.0 mol%                                 | toluene | <sup>t</sup> BuONa 1.2 equiv | 13                    |
| 11    | 110         | L1 3.6 mol% | FeCl <sub>3</sub> 3.0 mol%                                 | toluene | CsCO <sub>3</sub> 1.2 equiv  | <5                    |
| 12    | 110         | L1 3.6 mol% | FeCl <sub>3</sub> 3.0 mol%                                 | toluene | KOH 1.2 equiv                | 23                    |
| 13    | 110         | L1 3.6 mol% | FeCl <sub>3</sub> 3.0 mol%                                 | toluene | NaOH 1.2 equiv               | 6                     |
| 14    | 110         | L1 3.6 mol% | FeCl <sub>3</sub> 3.0 mol%                                 | toluene | none                         | trace                 |
| 15    | 110         | L1 1.5 mol% | FeCl <sub>3</sub> 3.0 mol%                                 | toluene | <sup>t</sup> BuOK 1.2 equiv  | 41                    |
| 16    | 110         | L1 3.0 mol% | FeCl <sub>3</sub> 3.0 mol%                                 | toluene | <sup>t</sup> BuOK 1.2 equiv  | 64                    |
| 17    | 110         | L1 4.5 mol% | FeCl <sub>3</sub> 3.0 mol%                                 | toluene | <sup>t</sup> BuOK 1.2 equiv  | 68                    |

|    |            |                    |                                          |                  |                             |       |
|----|------------|--------------------|------------------------------------------|------------------|-----------------------------|-------|
| 18 | 110        | <b>L1</b> 6.0 mol% | FeCl <sub>3</sub> 3.0 mol%               | toluene          | <sup>t</sup> BuOK 1.2 equiv | 75    |
| 19 | 110        | <b>L1</b> 7.5 mol% | FeCl <sub>3</sub> 3.0 mol%               | toluene          | <sup>t</sup> BuOK 1.2 equiv | 91    |
| 20 | 110        | <b>L1</b> 9.0 mol% | FeCl <sub>3</sub> 3.0 mol%               | toluene          | <sup>t</sup> BuOK 1.2 equiv | 88    |
| 21 | RT (7 day) | <b>L1</b> 7.2 mol% | FeCl <sub>3</sub> 3.0 mol%               | toluene          | <sup>t</sup> BuOK 1.2 equiv | 41    |
| 22 | 110        | <b>L1</b> 7.2 mol% | FeCl <sub>3</sub> 3.0 mol%               | H <sub>2</sub> O | <sup>t</sup> BuOK 1.2 equiv | trace |
| 23 | 110        | <b>L1</b> 7.2 mol% | FeCl <sub>3</sub> 3.0 mol%               | MeCN             | <sup>t</sup> BuOK 1.2 equiv | <5    |
| 24 | 110        | <b>L1</b> 7.2 mol% | FeCl <sub>3</sub> 3.0 mol%               | DMSO             | <sup>t</sup> BuOK 1.2 equiv | trace |
| 25 | 110        | <b>L1</b> 7.2 mol% | FeCl <sub>3</sub> 3.0 mol%               | THF              | <sup>t</sup> BuOK 1.2 equiv | >99   |
| 26 | 80         | <b>L1</b> 7.2 mol% | FeCl <sub>3</sub> 3.0 mol%               | THF              | <sup>t</sup> BuOK 1.2 equiv | >99   |
| 27 | 60         | <b>L1</b> 7.2 mol% | FeCl <sub>3</sub> 3.0 mol%               | THF              | <sup>t</sup> BuOK 1.2 equiv | 74    |
| 28 | 40         | <b>L1</b> 7.2 mol% | FeCl <sub>3</sub> 3.0 mol%               | THF              | <sup>t</sup> BuOK 1.2 equiv | 17    |
| 29 | 80         | <b>L1</b> 4.8 mol% | FeCl <sub>3</sub> 2.0 mol%               | THF              | <sup>t</sup> BuOK 1.2 equiv | 98    |
| 30 | 80         | <b>L1</b> 4.8 mol% | FeCl <sub>2</sub> 2.0 mol%               | THF              | <sup>t</sup> BuOK 1.2 equiv | 99    |
| 31 | 80         | <b>L1</b> 2.4 mol% | FeCl <sub>3</sub> 1.0 mol%               | THF              | <sup>t</sup> BuOK 1.2 equiv | 65    |
| 32 | 80         | <b>L1</b> 2.4 mol% | FeCl <sub>2</sub> 1.0 mol%               | THF              | <sup>t</sup> BuOK 1.2 equiv | 84    |
| 33 | 80         | <b>L1</b> 1.2 mol% | FeCl <sub>3</sub> 0.5 mol%               | THF              | <sup>t</sup> BuOK 1.2 equiv | 15    |
| 34 | 80         | <b>L1</b> 1.2 mol% | FeCl <sub>2</sub> 0.5 mol%               | THF              | <sup>t</sup> BuOK 1.2 equiv | 63    |
| 35 | 80         | <b>L1</b> 1.2 mol% | Fe 3.0 mol%                              | THF              | <sup>t</sup> BuOK 1.2 equiv | <5    |
| 36 | 80         | <b>L1</b> 1.2 mol% | FeCl <sub>3</sub> 1.0 mol% + Fe 1.0 mol% | THF              | <sup>t</sup> BuOK 1.2 equiv | 90    |
| 37 | 80         | <b>L1</b> 7.2 mol% | FeCl <sub>3</sub> 3.0 mol%               | THF              | <sup>t</sup> BuOK 1.0 equiv | 70    |
| 38 | 80         | <b>L1</b> 7.2 mol% | FeCl <sub>3</sub> 3.0 mol%               | THF              | <sup>t</sup> BuOK 1.6 equiv | 97    |
| 39 | 80         | <b>L1</b> 7.2 mol% | FeCl <sub>3</sub> 3.0 mol%               | THF              | <sup>t</sup> BuOK 2.0 equiv | 93    |

|    |           |                    |                            |     |                             |     |
|----|-----------|--------------------|----------------------------|-----|-----------------------------|-----|
| 40 | 80        | <b>L1</b> 7.2 mol% | FeCl <sub>3</sub> 3.0 mol% | THF | <sup>t</sup> BuOK 2.4 equiv | 75  |
| 41 | 80 (6 h)  | <b>L1</b> 7.2 mol% | FeCl <sub>3</sub> 3.0 mol% | THF | <sup>t</sup> BuOK 1.2 equiv | 69  |
| 42 | 80 (12 h) | <b>L1</b> 7.2 mol% | FeCl <sub>3</sub> 3.0 mol% | THF | <sup>t</sup> BuOK 1.2 equiv | 92  |
| 43 | 80 (24 h) | <b>L1</b> 7.2 mol% | FeCl <sub>3</sub> 3.0 mol% | THF | <sup>t</sup> BuOK 1.2 equiv | >99 |

<sup>a</sup>General reaction conditions: 1a (0.5 mmol, 1 equiv), 2a (0.6 mmol), 1mL of solvent, dry nitrogen atmosphere.

<sup>b</sup>Yield was determined by GC analysis with FID.

## 5. General Procedure for the *in-situ* Catalytic *N*-alkylation of Amines with Alcohols.

In a glovebox, FeCl<sub>3</sub> (3.0 mol%), 1,1'-dimethyl-3,3'-methylenediimidazolium dibromide (**L1**, 7.2 mol%) <sup>t</sup>BuOK (0.6 mmol), amine (0.5 mmol) and alcohol (0.6 mmol) were mixed with THF (1.0 mL) in a 15 mL flame-dried Schlenk tube equipped with a magnetic stirring bar and a Teflon cap. After, the sealed reaction tube was brought outside the glovebox. The mixture was then stirred at 80 °C for 18 h. After completion of the reaction, the reaction mixture was cooled to ambient temperature and 5 mL of water was added and the aqueous solution was extracted with CH<sub>2</sub>Cl<sub>2</sub> (3 × 5 mL). The combined extracts were dried over anhydrous Na<sub>2</sub>SO<sub>4</sub>, the solvent removed and the crude product purified on a flash chromatography column.

## 6. Analytical Data of *N*-alkylated Anilines.

*N*-benzylaniline (**4aa**).<sup>2</sup>

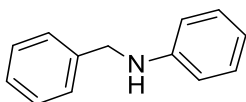

The compound was prepared as described in the general method (colorless oil, 98% isolated yield, 90.2 mg). <sup>1</sup>H NMR (400 MHz, CDCl<sub>3</sub>) δ 7.47 – 7.41 (m, 4H), 7.39 – 7.33 (m, 1H), 7.29 – 7.23 (m, 2H), 6.81 (t, *J* = 6.5 Hz, 1H), 6.71 (d, *J* = 7.8 Hz, 2H), 4.39 (s, 2H), 4.08 (s, 1H); MS (ESI<sup>+</sup>, MeOH) [M + H]<sup>+</sup> 183.65.

*N*-benzyl-4-fluoroaniline (**4ba**).<sup>2</sup>

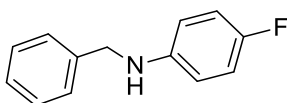

The compound was prepared as described in the general method (colorless oil, 89% isolated yield, 89.4 mg). <sup>1</sup>H NMR (400 MHz, CDCl<sub>3</sub>) δ 7.43 – 7.36 (m, 4H), 7.36 – 7.30 (m, 1H), 6.93 (t, *J* = 8.7 Hz, 2H), 6.65 – 6.54 (m, 2H), 4.32 (s, 2H), 3.94 (s, 1H); MS (ESI<sup>+</sup>, MeOH) [M + H]<sup>+</sup> 201.60.

*N*-benzyl-4-chloroaniline (**4ca**).<sup>2</sup>

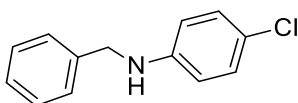

The compound was prepared as described in the general method (colorless oil, 91% isolated yield, 99.5 mg). <sup>1</sup>H NMR (400 MHz, CDCl<sub>3</sub>) δ 7.36 (d, *J* = 4.3 Hz, 4H), 7.33 – 7.27 (m, 1H), 7.12 (d, *J* = 8.6 Hz, 2H), 6.56 (d, *J* = 8.6 Hz, 2H), 4.31 (s, 2H), 4.08 (s, 1H); MS (ESI<sup>+</sup>, MeOH) [M + H]<sup>+</sup> 217.60.



*N*-benzyl-4-bromoaniline (**4da**).<sup>2</sup>

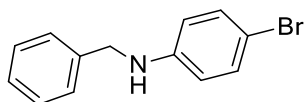

The compound was prepared as described in the general method (colorless oil, 94% isolated yield, 123.8 mg). <sup>1</sup>H NMR (400 MHz, CDCl<sub>3</sub>) δ 7.36 – 7.32 (m, 4H), 7.32 – 7.27 (m, 1H), 7.24 (d, *J* = 8.7 Hz, 2H), 6.49 (d, *J* = 8.8 Hz, 2H), 4.28 (s, 2H), 4.05 (s, 1H); MS (ESI<sup>+</sup>, MeOH) [M + H]<sup>+</sup> 263.40.

*N*-benzyl-4-methylaniline (**4ea**).<sup>2</sup>

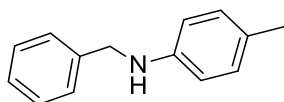

The compound was prepared as described in the general method (colorless oil, 81% isolated yield, 80.1 mg). <sup>1</sup>H NMR (400 MHz, CDCl<sub>3</sub>) δ 7.43 – 7.37 (m, 4H), 7.34 – 7.28 (m, 1H), 7.03 (d, *J* = 8.3 Hz, 2H), 6.61 (d, *J* = 8.4 Hz, 2H), 4.35 (s, 2H), 3.94 (s, 1H), 2.29 (s, 3H); MS (ESI<sup>+</sup>, MeOH) [M + H]<sup>+</sup> 198.65.

*N*-benzyl-4-methoxyaniline (**4fa**).<sup>2</sup>

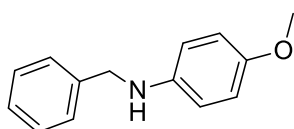

The compound was prepared as described in the general method (colorless oil, 63% isolated yield, 67.0 mg). <sup>1</sup>H NMR (400 MHz, CDCl<sub>3</sub>) δ 7.40 – 7.36 (m, 4H), 7.30 – 7.27 (m, 1H), 6.80 (d, *J* = 8.0 Hz, 2H), 6.63 (d, *J* = 8.0 Hz, 2H), 4.31 (s, 2H), 3.86 (s, 1H), 3.77 (s, 3H); MS (ESI<sup>+</sup>, MeOH) [M + H]<sup>+</sup> 213.60.

*N*-benzyl-3-bromoaniline (**4ga**).<sup>2</sup>

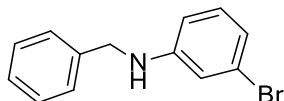

The compound was prepared as described in the general method (colorless oil, 84% isolated yield, 110.3 mg). <sup>1</sup>H NMR (400 MHz, CDCl<sub>3</sub>) δ 7.37 – 7.34 (m, 4H), 7.32 – 7.29 (m, 1H), 7.01 (t, *J* = 8.0 Hz, 1H), 6.83 (d, *J* = 7.8 Hz, 1H), 6.79 (s, 1H), 6.54 (d, *J* = 7.9 Hz, 1H), 4.31 (d, *J* = 5.1 Hz, 2H), 4.11 (s, 1H); MS (ESI<sup>+</sup>, MeOH) [M + H]<sup>+</sup> 263.40.

*N*-benzyl-3-methylaniline (**4ha**).<sup>2</sup>

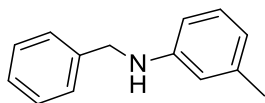

The compound was prepared as described in the general method (colorless oil, 82% isolated yield, 81.3 mg). <sup>1</sup>H NMR (400 MHz, CDCl<sub>3</sub>) δ 7.38 (d, *J* = 7.6 Hz, 4H), 7.33 – 7.26 (m, 1H), 7.09 (t, *J* = 7.6 Hz, 1H), 6.57 (d, *J* = 7.1 Hz, 1H), 6.48 (d, *J* = 13.5 Hz, 2H), 4.34 (s, 2H), 3.98 (s, 1H), 2.30 (s, 3H); MS (ESI<sup>+</sup>, MeOH) [M + H]<sup>+</sup> 198.65.

*N*-benzyl-2-bromoaniline (**4ia**).<sup>2</sup>

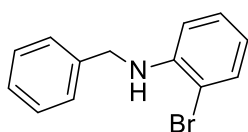

The compound was prepared as described in the general method (colorless oil, 87% isolated yield, 114.5 mg). <sup>1</sup>H NMR (400 MHz, CDCl<sub>3</sub>) δ 7.51 (d, *J* = 7.8 Hz, 1H), 7.44 – 7.40 (m, 4H), 7.37 – 7.32 (m, 1H), 7.19 (t, *J* = 7.7 Hz, 1H), 6.69 – 6.60 (m, 2H), 4.83 (s, 1H), 4.45 (d, *J* = 4.9 Hz, 2H); MS (ESI<sup>+</sup>, MeOH) [M + H]<sup>+</sup> 263.40.

*N*-benzyl-2-methylaniline (**4ja**).<sup>2</sup>

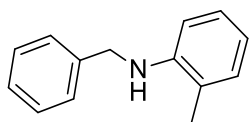

The compound was prepared as described in the general method (colorless oil, 64% isolated yield, 62.9 mg). <sup>1</sup>H NMR (400 MHz, CDCl<sub>3</sub>) δ 7.47 – 7.36 (m, 4H), 7.33 (t, *J* = 6.5 Hz, 1H), 7.19 – 7.07 (m, 2H), 6.72 (t, *J* = 7.4 Hz, 1H), 6.66 (d, *J* = 8.0 Hz, 1H), 4.41 (s, 2H), 3.90 (s, 1H), 2.21 (s, 3H); MS (ESI<sup>+</sup>, MeOH) [M + H]<sup>+</sup> 198.56.

*N*-benzyl-[1,1'-biphenyl]-2-amine (**4ka**).<sup>2</sup>

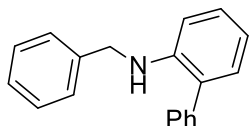

The compound was prepared as described in the general method (colorless oil, 77% isolated yield, 99.5 mg). <sup>1</sup>H NMR (400 MHz, CDCl<sub>3</sub>) δ 7.56 – 7.45 (m, 4H), 7.40 – 7.34 (m, 5H), 7.32 – 7.28 (m, 1H), 7.26 – 7.21 (m, 1H), 7.17 (d, *J* = 7.2 Hz, 1H), 6.83 (t, *J* = 7.4 Hz, 1H), 6.71 (d, *J* = 8.2 Hz, 1H), 4.42 (s, 1H), 4.37 (s, 2H); MS (ESI<sup>+</sup>, MeOH) [M + H]<sup>+</sup> 259.95.

*N*-Benzyl-3-(trifluoromethyl)aniline (**4ma**).<sup>1</sup>

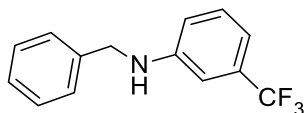

The compound was prepared as described in the general method (colorless oil, 74% isolated yield, 93.1 mg). <sup>1</sup>H NMR (400 MHz, CDCl<sub>3</sub>) δ 7.41 – 7.39 (m, 4H), 7.36 – 7.31 (m, 1H), 7.27 (t, *J* = 7.9 Hz, 1H), 6.99 – 6.96 (m, 1H), 6.87 (s, 1H), 6.78 (d, *J* = 8.4 Hz, 1H), 4.38 (s, 2H), 4.24 (s, 1H); MS (ESI<sup>+</sup>, MeOH) [M + H]<sup>+</sup> 252.57.

*N*-benzyl-2,3-dihydrobenzo[*b*][1,4]dioxin-6-amine (**4na**).<sup>2</sup>

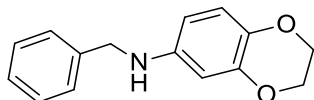

The compound was prepared as described in the general method (yellow oil, 81% isolated yield, 98.1 mg). <sup>1</sup>H NMR (400 MHz, CDCl<sub>3</sub>) δ 7.41 – 7.32 (m, 4H), 7.31 – 7.26 (m, 1H), 6.72 (d, *J* = 8.4 Hz, 1H), 6.24 – 6.17 (m, 2H), 4.26 (s, 2H), 4.24 – 4.21 (m, 2H), 4.20 – 4.16 (m, 2H), 3.42 (s, 1H); MS (ESI<sup>+</sup>, MeOH) [M + H]<sup>+</sup> 241.87.

*N*-benzylpyridin-3-amine (**4oa**).<sup>2</sup>

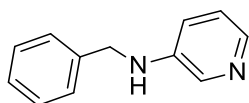

The compound was prepared as described in the general method (yellow oil, 91% isolated yield, 84.1 mg). <sup>1</sup>H NMR (400 MHz, CDCl<sub>3</sub>) δ 8.06 (s, 1H), 8.01 – 7.91 (m, 1H), 7.40 – 7.31 (m, 4H), 7.31 – 7.25 (m, 1H), 7.08 – 7.02 (m, 1H), 6.86 (d, *J* = 7.9 Hz, 1H), 4.33 (s, 2H), 4.25 (s, 1H); MS (ESI<sup>+</sup>, MeOH) [M + H]<sup>+</sup> 184.88.

(*E*)-*N*-benzyl-4-styrylaniline (**4ra**).<sup>2</sup>

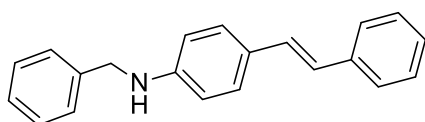

The compound was prepared as described in the general method (white solid, 99% isolated yield, 142.0 mg). <sup>1</sup>H NMR (400 MHz, CDCl<sub>3</sub>) δ 7.53 – 7.48 (m, 2H), 7.42 – 7.32 (m, 9H), 7.24 (t, *J* = 6.4 Hz, 1H), 7.11 – 6.91 (m, 2H), 6.70 – 6.61 (m, 2H), 4.38 (s, 2H), 4.17 (q, *J* = 7.1 Hz,

1H); MS (ESI<sup>+</sup>, MeOH) [M + H]<sup>+</sup> 285.90.

*N*-benzyl-2-methoxyaniline (**4ta**).<sup>6</sup>

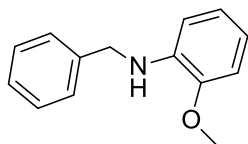

The compound was prepared as described in the general method (colorless oil, 76% isolated yield, 80.6 mg). <sup>1</sup>H NMR (400 MHz, CDCl<sub>3</sub>) δ 7.40 – 7.39 (m, 3H), 7.37 – 7.35 (m, 2H), 7.35 – 7.33 (m, 1H), 6.85 (td, *J* = 7.6, 1.3 Hz, 1H), 6.81 (dd, *J* = 7.9, 1.2 Hz, 1H), 6.70 (td, *J* = 7.7, 1.5 Hz, 1H), 6.62 (dd, *J* = 7.8, 1.4 Hz, 1H), 4.65 (s, 1H), 4.37 (s, 2H), 3.86 (s, 3H); MS (ESI<sup>+</sup>, MeOH) [M + H]<sup>+</sup> 214.40.

4-(Benzylamino)benzonitrile (**4ua**).<sup>7</sup>

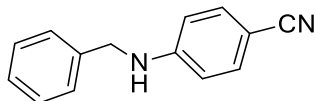

The compound was prepared as described in the general method (yellow oil, 88% isolated yield, 83.7 mg). <sup>1</sup>H NMR (400 MHz, CDCl<sub>3</sub>) δ 7.45 – 7.27 (m, 7H), 6.59 (d, *J* = 8.8 Hz, 2H), 4.74 (s, 1H), 4.38 (d, *J* = 5.6 Hz, 2H); MS (ESI<sup>+</sup>, MeOH) [M + H]<sup>+</sup> 209.48.

*N*-(4-chlorobenzyl)aniline (**4ab**).<sup>2</sup>

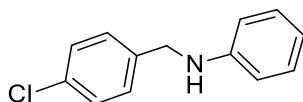

The compound was prepared as described in the general method (yellow oil, 82% isolated yield, 89.4 mg). <sup>1</sup>H NMR (400 MHz, CDCl<sub>3</sub>) δ 7.36 – 7.30 (m, 4H), 7.25 – 7.18 (m, 2H), 6.77 (t, *J* = 7.3 Hz, 1H), 6.67 – 6.60 (m, 2H), 4.33 (s, 2H), 4.07 (s, 1H); MS (ESI<sup>+</sup>, MeOH) [M + H]<sup>+</sup> 218.50.

*N*-(3-chlorobenzyl)aniline (**4ac**).<sup>2</sup>

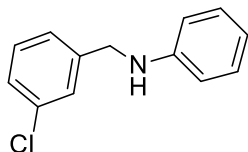

The compound was prepared as described in the general method (yellow oil, 85% isolated yield, 92.4 mg). <sup>1</sup>H NMR (400 MHz, CDCl<sub>3</sub>) δ 7.42 (s, 1H), 7.34 – 7.28 (m, 3H), 7.28 – 7.20 (m, 2H), 6.80 (t, *J* = 6.8 Hz, 1H), 6.66 (d, *J* = 7.8 Hz, 2H), 4.34 (s, 2H), 4.10 (s, 1H); MS (ESI<sup>+</sup>, MeOH) [M + H]<sup>+</sup> 218.56.

*N*-(2-chlorobenzyl)aniline (**4ad**).<sup>8</sup>

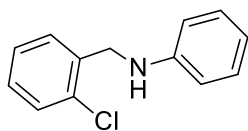

The compound was prepared as described in the general method (orange oil, 50% isolated yield, 54.8 mg). <sup>1</sup>H NMR (400 MHz, CDCl<sub>3</sub>) δ 7.28 – 7.26 (m, 2H), 7.26 – 7.13 (m, 4H), 6.72 (t, *J* = 7.3 Hz, 1H), 6.63 (t, *J* = 8.7 Hz, 2H), 4.38 (d, *J* = 42.8 Hz, 2H), 4.12 (s, 1H); MS (ESI<sup>+</sup>, MeOH) [M + H]<sup>+</sup> 218.65.

*N*-(4-methylbenzyl)aniline (**4ae**).<sup>2</sup>

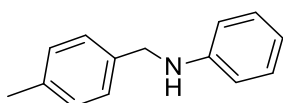

The compound was prepared as described in the general method (yellow oil, 99% isolated yield, 97.3 mg). <sup>1</sup>H NMR (400 MHz, CDCl<sub>3</sub>) δ 7.31 (d, *J* = 8.0 Hz, 2H), 7.25 – 7.18 (m, 4H), 6.76 (tt, *J* = 7.3, 1.1 Hz, 1H), 6.72 – 6.65 (m, 2H), 4.32 (s, 2H), 4.01 (s, 1H), 2.40 (s, 3H); MS (ESI<sup>+</sup>,

MeOH)  $[M + H]^+$  198.65.

*N*-(4-methoxybenzyl)aniline (**4af**).<sup>2</sup>

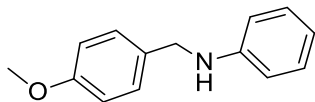

The compound was prepared as described in the general method (yellow oil, 98% isolated yield, 104.6 mg). <sup>1</sup>H NMR (400 MHz, CDCl<sub>3</sub>)  $\delta$  7.34 (d,  $J$  = 8.6 Hz, 2H), 7.23 (ddd,  $J$  = 8.4, 5.7, 1.9 Hz, 2H), 6.93 (d,  $J$  = 8.6 Hz, 2H), 6.77 (t,  $J$  = 7.3 Hz, 1H), 6.68 (d,  $J$  = 7.7 Hz, 2H), 4.29 (s, 2H), 3.99 (s, 1H), 3.84 (s, 3H); MS (ESI<sup>+</sup>, MeOH)  $[M + H]^+$  214.60.

*N*-(4-(methylthio)benzyl)aniline (**4ag**).<sup>2</sup>

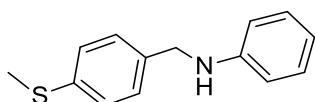

The compound was prepared as described in the general method (yellow oil, 90% isolated yield, 102.3 mg). <sup>1</sup>H NMR (400 MHz, CDCl<sub>3</sub>)  $\delta$  7.36 – 7.24 (m, 4H), 7.24 – 7.16 (m, 2H), 6.79 – 6.71 (m, 1H), 6.66 (d,  $J$  = 7.8 Hz, 2H), 4.31 (s, 2H), 4.04 (s, 1H), 2.51 (s, 3H); MS (ESI<sup>+</sup>, MeOH)  $[M + H]^+$  230.90.

*N*-(3-methylbenzyl)aniline (**4ah**).<sup>2</sup>

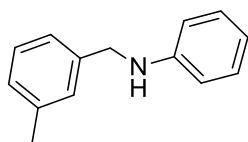

The compound was prepared as described in the general method (yellow oil, 86% isolated yield, 85.0 mg). <sup>1</sup>H NMR (400 MHz, CDCl<sub>3</sub>)  $\delta$  7.39 – 7.26 (m, 5H), 7.22 (d,  $J$  = 7.3 Hz, 1H), 6.85 (t,  $J$  = 7.3 Hz, 1H), 6.76 (d,  $J$  = 8.1 Hz, 2H), 4.39 (s, 2H), 4.08 (s, 1H), 2.48 (s, 3H); MS (ESI<sup>+</sup>, MeOH)  $[M + H]^+$  198.68.

*N*-(2-methylbenzyl)aniline (**4ai**).<sup>2</sup>

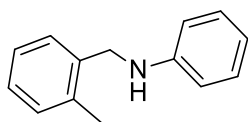

The compound was prepared as described in the general method (yellow oil, 86% isolated yield, 84.8 mg). <sup>1</sup>H NMR (400 MHz, CDCl<sub>3</sub>)  $\delta$  7.37 (d,  $J$  = 7.3 Hz, 1H), 7.25 – 7.21 (m, 5H), 6.76 (t,  $J$  = 7.3 Hz, 1H), 6.67 (d,  $J$  = 7.9 Hz, 2H), 4.30 (s, 2H), 3.86 (s, 1H), 2.41 (s, 3H); MS (ESI<sup>+</sup>, MeOH)  $[M + H]^+$  198.62.

*N*-(4-(trifluoromethyl)benzyl)aniline (**4aj**).<sup>9</sup>

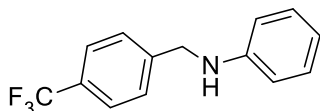

The compound was prepared as described in the general method (yellow oil, 46% isolated yield, 57.9 mg). <sup>1</sup>H NMR (400 MHz, CDCl<sub>3</sub>)  $\delta$  7.65 – 7.59 (m, 2H), 7.49 (d,  $J$  = 7.9 Hz, 2H), 7.18 (t,  $J$  = 7.8 Hz, 2H), 6.74 (t,  $J$  = 7.3 Hz, 1H), 6.61 (d,  $J$  = 8.0 Hz, 2H), 4.42 (s, 2H), 4.15 (s, 1H); MS (ESI<sup>+</sup>, MeOH)  $[M + H]^+$  252.65.

*N*-(3-(trifluoromethyl)benzyl)aniline (**4ak**).<sup>2</sup>

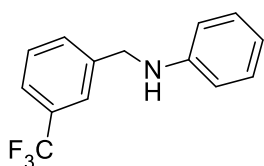

The compound was prepared as described in the general method (yellow oil, 75% isolated yield, 94.0 mg).  $^1\text{H}$  NMR (400 MHz,  $\text{CDCl}_3$ )  $\delta$  7.71 (s, 1H), 7.62 (t,  $J = 8.1$  Hz, 2H), 7.51 (t,  $J = 7.7$  Hz, 1H), 7.30 – 7.21 (m, 2H), 6.82 (t,  $J = 7.3$  Hz, 1H), 6.69 (d,  $J = 7.8$  Hz, 2H), 4.45 (s, 2H), 4.15 (s, 1H); MS (ESI $^+$ , MeOH)  $[\text{M} + \text{Na}]^+$  274.03.

*N*-(thiophen-3-ylmethyl)aniline (**4al**).<sup>2</sup>

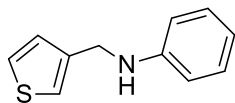

The compound was prepared as described in the general method (yellow oil, 82% isolated yield, 77.8 mg).  $^1\text{H}$  NMR (400 MHz,  $\text{CDCl}_3$ )  $\delta$  7.36 – 7.31 (m, 1H), 7.26 – 7.17 (m, 3H), 7.15 – 7.08 (m, 1H), 6.77 (t,  $J = 7.3$  Hz, 1H), 6.68 (d,  $J = 7.7$  Hz, 2H), 4.36 (s, 2H), 3.99 (s, 1H); MS (ESI $^+$ , MeOH)  $[\text{M} + \text{H}]^+$  189.75.

*N*-(pyridin-3-ylmethyl)aniline (**4am**).<sup>2</sup>

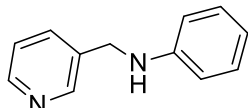

The compound was prepared as described in the general method (yellow oil, 90% isolated yield, 82.4 mg).  $^1\text{H}$  NMR (400 MHz,  $\text{CDCl}_3$ )  $\delta$  8.62 (s, 1H), 8.51 (d,  $J = 3.8$  Hz, 1H), 7.69 (d,  $J = 7.8$  Hz, 1H), 7.30 – 7.22 (m, 1H), 7.22 – 7.12 (m, 2H), 6.74 (t,  $J = 7.3$  Hz, 1H), 6.66 – 6.57 (m, 2H), 4.35 (s, 2H), 4.25 – 3.83 (m, 1H); MS (ESI $^+$ , MeOH)  $[\text{M} + \text{H}]^+$  184.81.

*N*-Benzhydrylaniline (**4an**).<sup>10</sup>

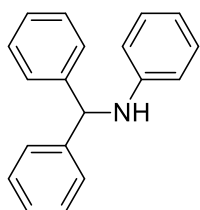

The compound was prepared as described in the general method at 90 °C (yellow liquid, 51% isolated yield, 66.4 mg).  $^1\text{H}$  NMR (400 MHz,  $\text{CDCl}_3$ )  $\delta$  7.37 – 7.16 (m, 12H), 6.79 – 6.77 (m, 1H), 6.77 – 6.65 (m, 2H), 5.78 (s, 1H), 3.11 (s, 1H); MS (ESI $^+$ , MeOH)  $[\text{M} + \text{H}]^+$  258.64.

*N*-(3-phenylpropyl)aniline (**4ao**).<sup>2</sup>

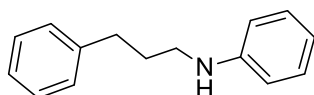

The compound was prepared as described in the general method (yellow oil, 69% isolated yield, 73.0 mg).  $^1\text{H}$  NMR (400 MHz,  $\text{CDCl}_3$ )  $\delta$  7.42 (d,  $J = 6.8$  Hz, 1H), 7.36 – 7.21 (m, 6H), 6.81 (t,  $J = 6.8$  Hz, 1H), 6.72 (d,  $J = 8.2$  Hz, 2H), 4.34 (s, 2H), 3.91 (s, 1H), 2.50 – 2.37 (m, 4H); MS (ESI $^+$ , MeOH)  $[\text{M} + \text{H}]^+$  211.60.

*N*-methylaniline (**4ap**).<sup>8</sup>

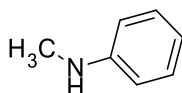

The compound was prepared as described in the general method (yellow liquid, 60% isolated yield, 32.1 mg).  $^1\text{H}$  NMR (400 MHz,  $\text{CDCl}_3$ )  $\delta$  7.21 (t,  $J = 7.9$  Hz, 2H), 6.73 (t,  $J = 7.3$  Hz, 1H), 6.64 (d,  $J = 7.9$  Hz, 2H), 3.70 (s, 1H), 2.85 (s, 3H); MS (ESI $^+$ , MeOH)  $[\text{M} + \text{H}]^+$  108.65.

*N*-(4-Chlorobenzyl)pyridin-2-amine (**4sb**).<sup>1</sup>

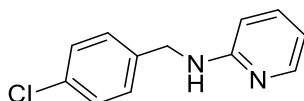

The compound was prepared as described in the general method (white solid, 99% isolated yield, 108.0 mg).  $^1\text{H}$  NMR (400 MHz,  $\text{CDCl}_3$ )  $\delta$

8.09 (d,  $J = 4.2$  Hz, 1H), 7.39 (t,  $J = 8.6$  Hz, 1H), 7.29 (s, 4H), 6.63 – 6.57 (m, 1H), 6.34 (d,  $J = 8.4$  Hz, 1H), 5.02 (s, 1H), 4.48 (d,  $J = 6.0$  Hz, 2H); MS (ESI<sup>+</sup>, MeOH) [M + H]<sup>+</sup> 219.1.

*N*-(4-Methoxybenzyl)pyridin-2-amine (**4sf**).<sup>1</sup>

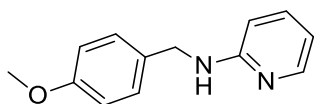

The compound was prepared as described in the general method (white solid, 99% isolated yield, 106.8 mg). <sup>1</sup>H NMR (400 MHz, CDCl<sub>3</sub>)  $\delta$  8.09 (d,  $J = 4.8$  Hz, 1H), 7.39 (t,  $J = 6.9$  Hz, 1H), 7.28 (d,  $J = 8.6$  Hz, 2H), 6.87 (d,  $J = 8.6$  Hz, 2H), 6.62 – 6.54 (m, 1H), 6.36 (d,  $J = 8.4$  Hz, 1H), 4.90 (s, 1H), 4.42 (d,  $J = 5.6$  Hz, 2H), 3.79 (s, 3H); MS (ESI<sup>+</sup>, MeOH) [M + H]<sup>+</sup> 215.1.

*N*-(4-Methoxybenzyl)pyridin-2-amine (**4aq**).

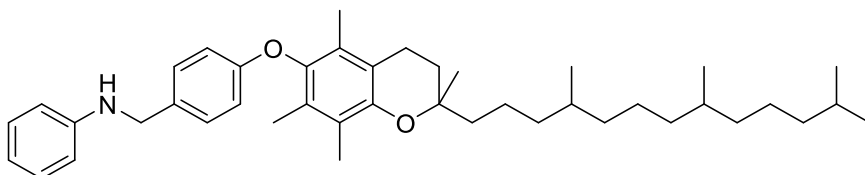

The compound was prepared as described in the general method (white solid, 66% isolated yield, 201.9 mg). <sup>1</sup>H NMR (400 MHz, CDCl<sub>3</sub>)  $\delta$  7.23 (d,  $J = 8.4$  Hz, 2H), 6.75 (d,  $J = 8.4$  Hz, 2H), 4.58 (s, 2H), 2.65 (d,  $J = 6.5$  Hz, 2H), 2.16 (s, 3H), 2.04 (s, 3H), 2.00 (s, 3H), 1.86 (ddq,  $J = 19.8, 13.2, 6.7$  Hz, 2H), 1.31 (s, 24H), 0.91 (t,  $J = 6.5$  Hz, 12H); <sup>13</sup>C NMR (101 MHz, CDCl<sub>3</sub>)  $\delta$  158.29, 148.85, 148.36, 143.54, 132.24, 131.65, 129.33, 129.06, 128.28, 126.34, 123.38, 117.95, 117.57, 114.92, 112.90, 75.11, 47.98, 40.14, 39.52, 37.61, 37.55, 37.44, 37.43, 32.83, 31.45, 28.11, 24.95, 24.59, 23.98, 22.87, 22.78, 21.16, 20.76, 19.91, 19.84, 19.83, 13.04, 12.16, 11.96; HRMS (ESI<sup>+</sup>, MeOH) [M + H]<sup>+</sup> 612.47050.

## 7. *N*-methylation of Aniline with Methanol.

Table S2. *N*-methylation for Amination of Methanol (2p) with Aniline (1a)<sup>a</sup>

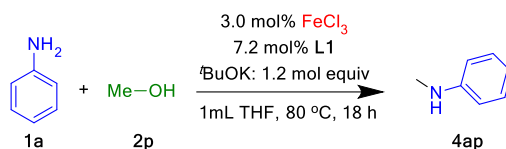

| Entry | T/°C (time) | solvent | base                        | yield <sup>b</sup> /% |
|-------|-------------|---------|-----------------------------|-----------------------|
| 1     | 80          | THF     | <sup>t</sup> BuOK 1.2 equiv | 21                    |
| 2     | 80          | MeOH    | <sup>t</sup> BuOK 1.2 equiv | trace                 |
| 3     | 60          | THF     | <sup>t</sup> BuOK 1.2 equiv | 26                    |
| 4     | 40          | THF     | <sup>t</sup> BuOK 1.2 equiv | 7                     |
| 5     | 80          | THF     | <sup>t</sup> BuOK 1.2 equiv | <5                    |

<sup>a</sup>General reaction conditions: 1a (0.5 mmol, 1 equiv), 2a (0.6 mmol), 1mL of solvent, dry nitrogen atmosphere.

<sup>b</sup>Yield was determined by GC analysis with FID and 1,3,5-trimethoxybenzene as standard.

## 8. *N*-alkylation of Amines with Different amount of Alcohols and Base

Table S3. Amination of Different Amount of Benzyl Alcohol (2a) and <sup>t</sup>BuOK with Aniline (1a)<sup>a</sup>

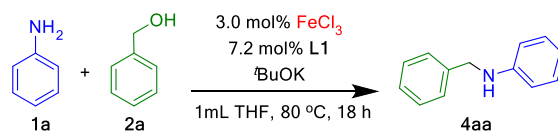

| Entry          | T/°C (time) | solvent | Benzyl Alcohol    | base                        | yeild <sup>b</sup> /% |
|----------------|-------------|---------|-------------------|-----------------------------|-----------------------|
| 1              | 80          | THF     | 1.2 equiv         | <sup>t</sup> BuOK 1.2 equiv | >99                   |
| 2              | 80          | THF     | 4.0 equiv         | <sup>t</sup> BuOK 1.2 equiv | 33                    |
| 3              | 80          | THF     | 4.0 equiv         | <sup>t</sup> BuOK 4.0 equiv | 97                    |
| 4 <sup>c</sup> | 80          | THF     | 4.0 equiv         | <sup>t</sup> BuOK 1.2 equiv | 49                    |
| 5              | 80          | THF     | 1 mL <sup>d</sup> | <sup>t</sup> BuOK 1.2 equiv | trace                 |

<sup>a</sup>General reaction conditions: 1a (0.5 mmol, 1 equiv), 1mL of solvent, dry nitrogen atmosphere.

<sup>b</sup>Yield was determined by GC analysis with FID.

<sup>c</sup>A3 molecular sieve was added.

<sup>d</sup>Use benzyl alcohol as solvent instead of THF.

## 9. Detection of the Reduction of Iron(III).

Table S4. Hydrogen produce by Amination of Benzyl Alcohol (1a) with Aniline (2a)<sup>a</sup>

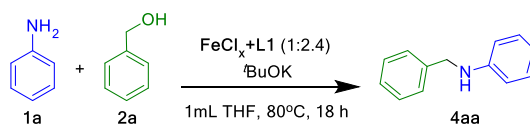

| entry | FeCl <sub>x</sub>        | <sup>t</sup> BuOK (mmol) | V (mL) <sup>b</sup> | Yield (%) <sup>c</sup> | 2a (mol%) | H <sub>2</sub> (ppm) <sup>d</sup> | H <sub>2</sub> (mol%) <sup>e</sup> |
|-------|--------------------------|--------------------------|---------------------|------------------------|-----------|-----------------------------------|------------------------------------|
| 0     | none                     | 0.75                     | 15.5                | <5 (2.3)               | -         | 968                               | 0.1                                |
| 1     | 6 mol% FeCl <sub>2</sub> | 0.75                     | 15.4                | > 99 (99.6)            | trace     | 16.0×10 <sup>4</sup>              | 20.1                               |

|   |                           |      |      |             |       |                      |      |
|---|---------------------------|------|------|-------------|-------|----------------------|------|
| 2 | 6 mol% FeCl <sub>3</sub>  | 0.75 | 15.2 | > 99 (99.6) | trace | 14.6×10 <sup>4</sup> | 18.1 |
| 3 | 18 mol% FeCl <sub>2</sub> | 1.05 | 15.2 | 96.4        | trace | 19.0×10 <sup>4</sup> | 23.6 |
| 4 | 18 mol% FeCl <sub>3</sub> | 1.05 | 13.7 | 92.7        | trace | 18.8×10 <sup>4</sup> | 21.0 |
| 5 | 30 mol% FeCl <sub>2</sub> | 1.35 | 14.6 | 84.3        | 8.4   | 22.4×10 <sup>4</sup> | 26.7 |
| 6 | 30 mol% FeCl <sub>3</sub> | 1.35 | 14.4 | 68.1        | 23.7  | 16.1×10 <sup>4</sup> | 18.9 |

<sup>a</sup>General reaction conditions: **1a** (0.5 mmol, 1 equiv), **2a** (0.6 mmol), <sup>t</sup>BuOK (0.75 mmol), 1 mL of THF, dry nitrogen atmosphere, metal: ligand = 1: 2.4.

<sup>b</sup>Gas volume in Schlenk tube (Volume of added liquid to full fill the Schlenk tube).

<sup>c</sup>Yield was determined by GC analysis with FID and 1,3,5-trimethoxybenzene as standard.

<sup>d</sup>Hydrogen was determined by GC analysis with TCD.

<sup>e</sup>H<sub>2</sub> (mol%) = H<sub>2</sub> (ppm) × V (mL) / (24.5 (mL / mmol) × 0.5 mmol).



Table S5. UV-Vis Spectrophotometers for Reaction Solutions<sup>a</sup>

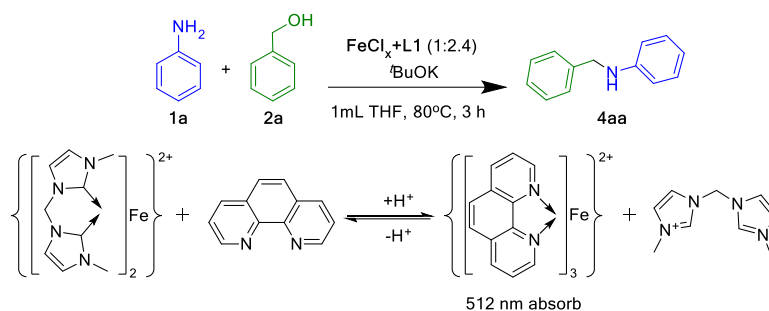

| entry | Aniline  | Benzyl alcohol | <i>t</i> BuOK | L1        | FeCl <sub>x</sub>           | Abs (512nm) | Figure S1 |
|-------|----------|----------------|---------------|-----------|-----------------------------|-------------|-----------|
| 1     | 0        | 0              | 0             | 0         | 18.0 mol% FeCl <sub>3</sub> | 0.192       | (a)       |
| 2     | 0        | 0              | 0             | 0         | 18.0 mol% FeCl <sub>2</sub> | 1.929       | (b)       |
| 3     | 0.5 mmol | 0.6 mmol       | 1.05 mmol     | 43.2 mol% | 18.0 mol% FeCl <sub>3</sub> | 0.444       | (c)       |
| 4     | 0        | 0.6 mmol       | 1.05 mmol     | 43.2 mol% | 18.0 mol% FeCl <sub>3</sub> | 0.682       | (d)       |
| 5     | 0.5 mmol | 0              | 1.05 mmol     | 43.2 mol% | 18.0 mol% FeCl <sub>3</sub> | 0.257       | (e)       |
| 6     | 0.5 mmol | 0.6 mmol       | 0             | 43.2 mol% | 18.0 mol% FeCl <sub>3</sub> | 0.169       | (f)       |
| 7     | 0.5 mmol | 0.6 mmol       | 1.05 mmol     | 0         | 18.0 mol% FeCl <sub>3</sub> | 0.197       | (g)       |
| 8     | 0.5 mmol | 0.6 mmol       | 1.05 mmol     | 43.2 mol% | 0                           | 0.034       | (h)       |
| 9     | 0.5 mmol | 0.6 mmol       | 1.35 mmol     | 72.0 mol% | 30.0 mol% FeCl <sub>3</sub> | 0.725       | (i)       |
| 10    | 0        | 0              | 1.05 mmol     | 43.2 mol% | 18.0 mol% FeCl <sub>3</sub> | 0.250       | (j)       |
| 11    | 0        | 0              | 1.05 mmol     | 43.2 mol% | 18.0 mol% FeCl <sub>2</sub> | 0.586       | (k)       |

<sup>a</sup> General reaction conditions: **1a** (0.5 mmol, 1 equiv), **2a** (0.6 mmol), *t*BuOK (1.05 mmol - 1.35 mmol), 1 mL of THF, dry nitrogen atmosphere, metal: ligand = 1: 2.4, react for 3 hours. After the reaction mixture was cooled to room temperature, 100 μL reaction solution was taken in a 25 mL volumetric flask, 5 mL water was added to dilute it. Then, 2 mL of 0.1 mol/L HCl, 10 mL of 0.008 mol/L 1,10-Phenanthroline, 2 mL of 1 mol/L sodium acetate were added in order. Finally, water was added to dilute to scale. 2 mL of liquid in the volumetric flask was added to a 10 mm pathlength quartz cell and spectral absorbance was measured with a laboratory benchtop spectrophotometer between 200 and 800 nm.

Figure S1. UV-Vis Spectrophotometers for Reaction Solutions between 200 and 800 nm.

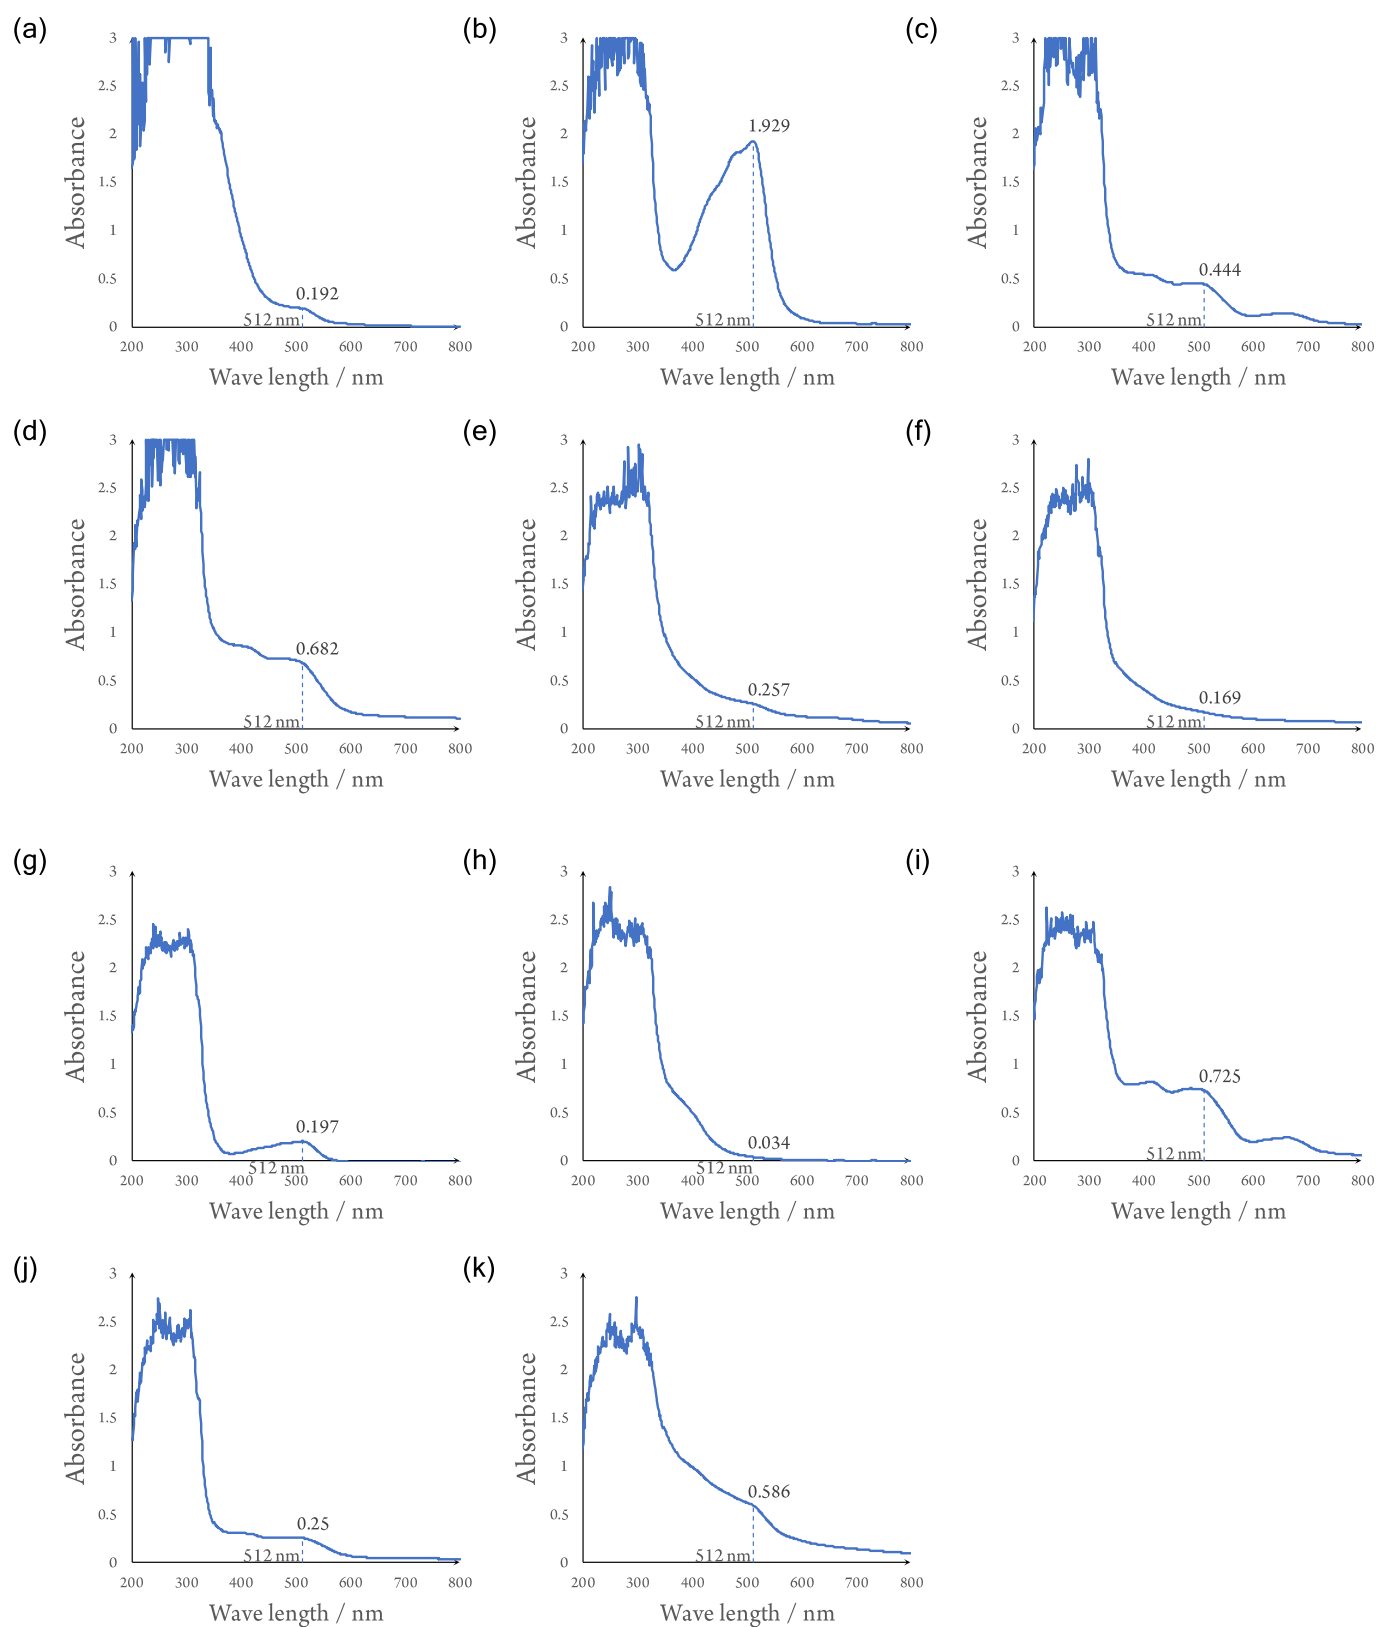

## 10. X-ray Photoelectron Spectrum

Table S6. Fitting parameters for high resolution XPS Fe 2p spectra of the dried reaction solution.

| Band                                | Position (eV) | Separation (eV) | FWHM (eV) | % Gaussian |
|-------------------------------------|---------------|-----------------|-----------|------------|
| Fe <sup>II</sup> 2p <sub>3/2</sub>  | 708.0         | 0               | 1.43      | 80         |
| Satellite                           | 711.4         | 3.4             | 2.95      | 80         |
| Fe <sup>II</sup> 2p <sub>1/2</sub>  | 721.6         | 13.6            | 2.96      | 80         |
| Satellite                           | 726.3         | 18.3            | 3.54      | 80         |
| Fe <sup>III</sup> 2p <sub>3/2</sub> | 709.9         | 0               | 1.92      | 80         |
| Satellite                           | 714.0         | 4.1             | 3.2       | 80         |
| Fe <sup>III</sup> 2p <sub>1/2</sub> | 723.5         | 13.6            | 4.85      | 80         |
| Satellite                           | 730.4         | 20.5            | 4.73      | 80         |

## 11. Characterization for Metal Hydride.

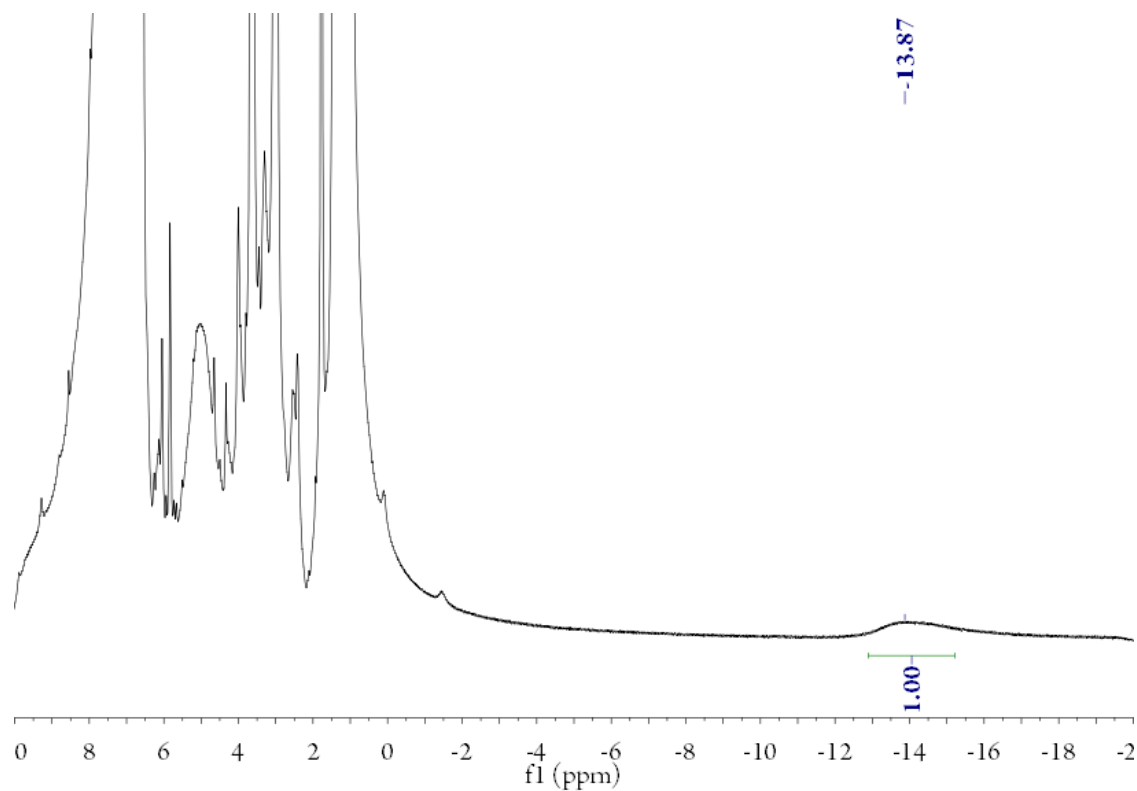

Figure S2. <sup>1</sup>H NMR(C<sub>6</sub>D<sub>6</sub>) characterization of *in-situ* generated [Fe-H] species.

## 12. Deuterium Labeling Experiments.

Scheme S4. Synthesis of **1a-d**<sup>1</sup>

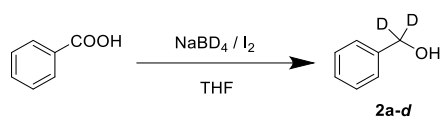

A 1000 mL round-bottom flask was fitted with a magnetic stir bar, a reflux condenser, and an additional funnel. The flask was charged with NaBD<sub>4</sub> (2.00 g, 48.0 mmol) and THF (80 mL, predried over sodium). Benzoic acid (3.90 g, 32 mmol) was added in one portion. The flask was cooled to 0 °C in an ice bath. A solution of I<sub>2</sub> (8.12 g, 32.0 mmol) in 100 mL of THF was added dropwise over 60 min. After gas evolution had ceased, the flask was heated to reflux for 18 h and then cooled to room temperature, and methanol was added cautiously until the mixture turned clear. After stirring 30 min, the solvent was removed by rotary evaporation leaving a white paste which was dissolved by addition of 20% aqueous KOH (70 mL). The solution was stirred for 4 h and extracted with CH<sub>2</sub>Cl<sub>2</sub> (60 mL × 2). The combined organic layers were washed with brine, dried over anhydrous Na<sub>2</sub>SO<sub>4</sub>, and concentrated under vacuum. The residue **2a-d** (2.52 g) was obtained in 71%.

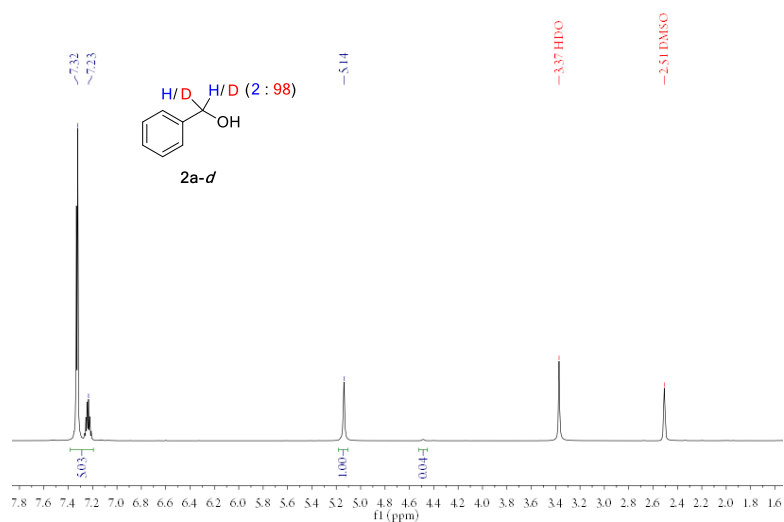

Figure S3. <sup>1</sup>H NMR (DMSO-*d*<sub>6</sub>) spectra of the synthetic **2a-d**.

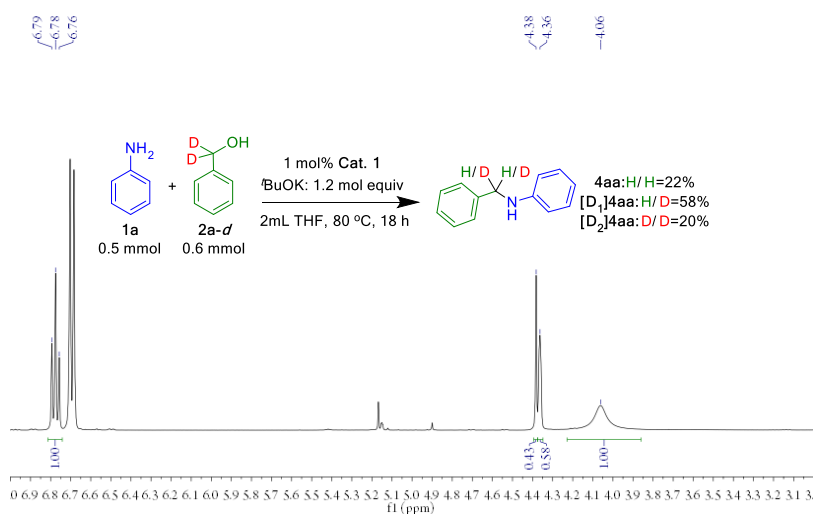

Figure S4.  $^1\text{H}$  NMR ( $\text{CDCl}_3$ ) spectra of the products of the reaction of **2a-d** with **1a** in the range of 3-7 ppm.

### 13. Monitoring the Kinetics of the Reaction.

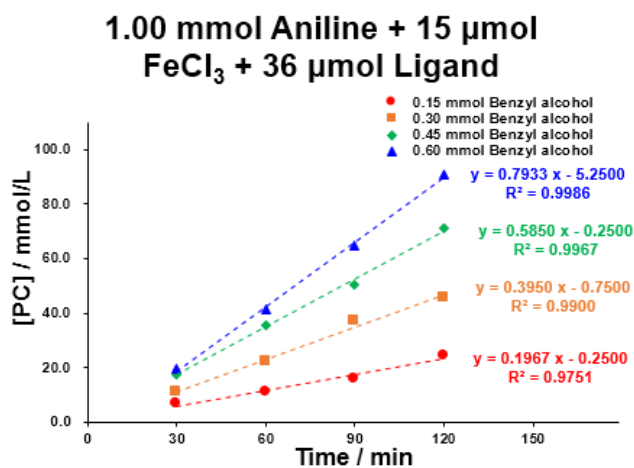

Figure S5. Control experiments for change the amount of benzyl alcohol.

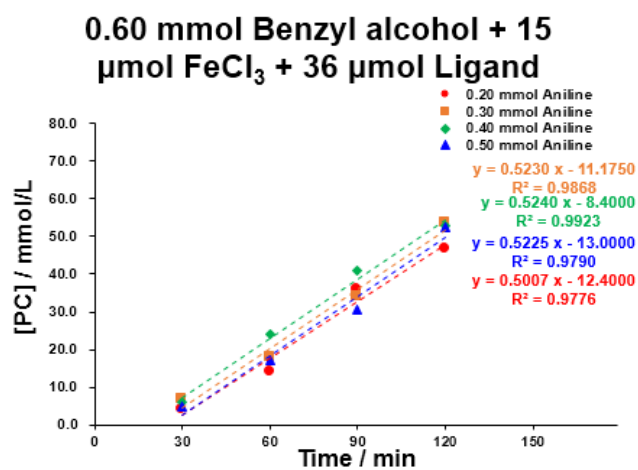

Figure S6. Control Experiments for Change the Amount of aniline.

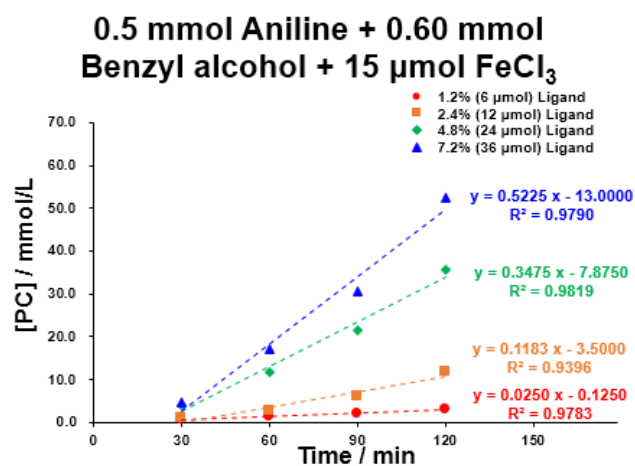

Figure S7. Control experiments for change the amount of  $\text{FeCl}_3$ .

0.5 mmol Aniline + 0.60 mmol  
Benzyl alcohol + 36  $\mu\text{mol}$  Ligand

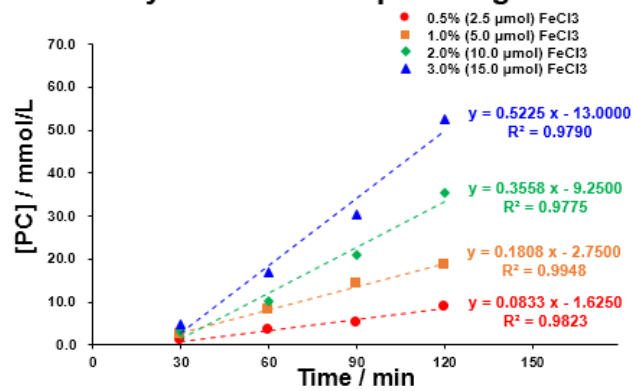

Figure S8. Control experiments for change the amount of L1.

## 14. DFT Calculations.

Scheme S5. Comparison of Different Metals for the Metal Hydride and Transition States.

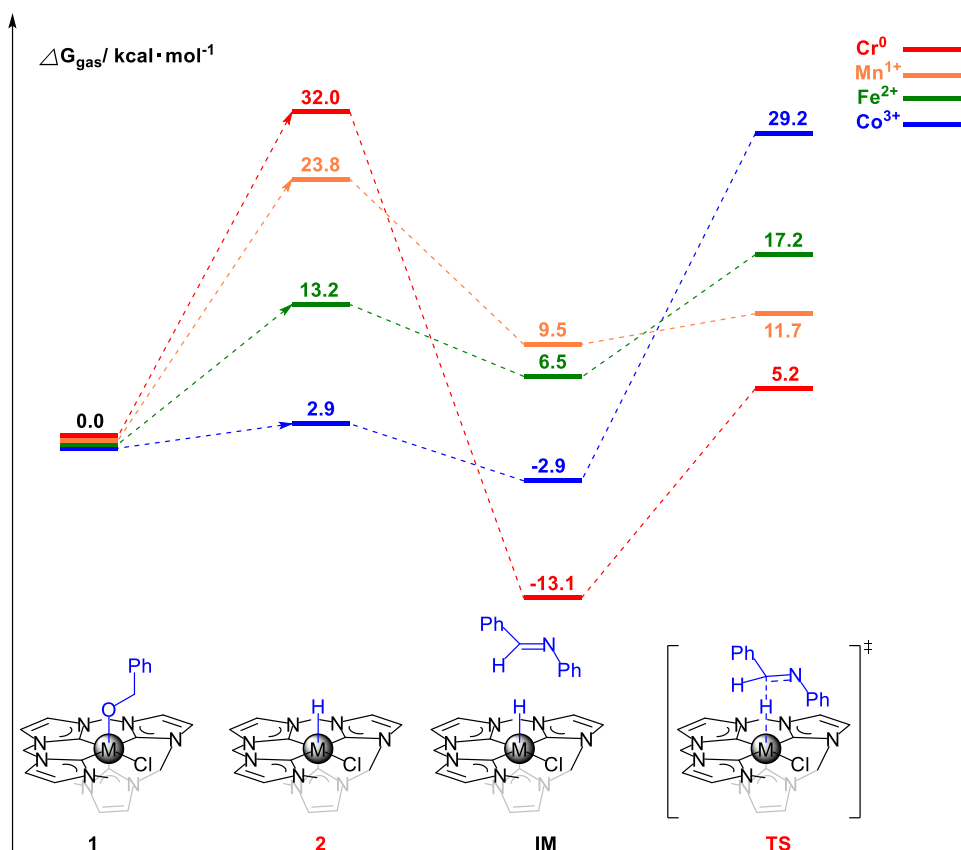

Scheme S6. Proposed Mechanism of Tetracarbone Iron(III) Complex for Catalytic Cycle

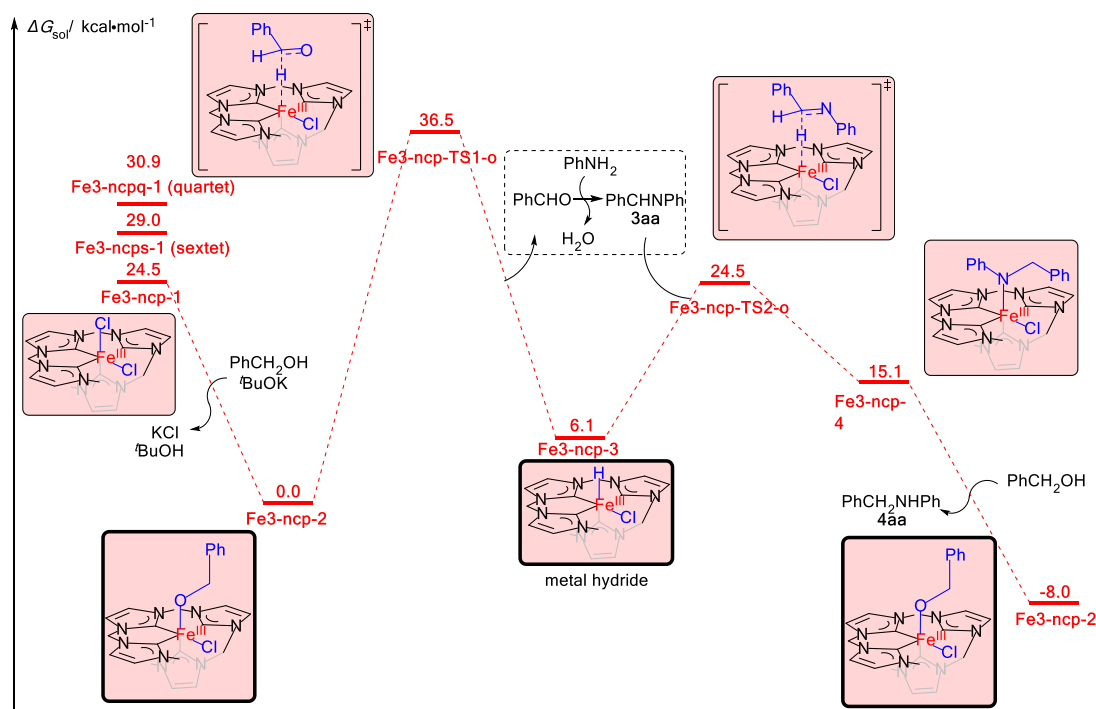

Scheme S7. Proposed Mechanism of Non-coplanar and Coplanar Tetracarbene Iron(II) Complex for Catalytic Cycle

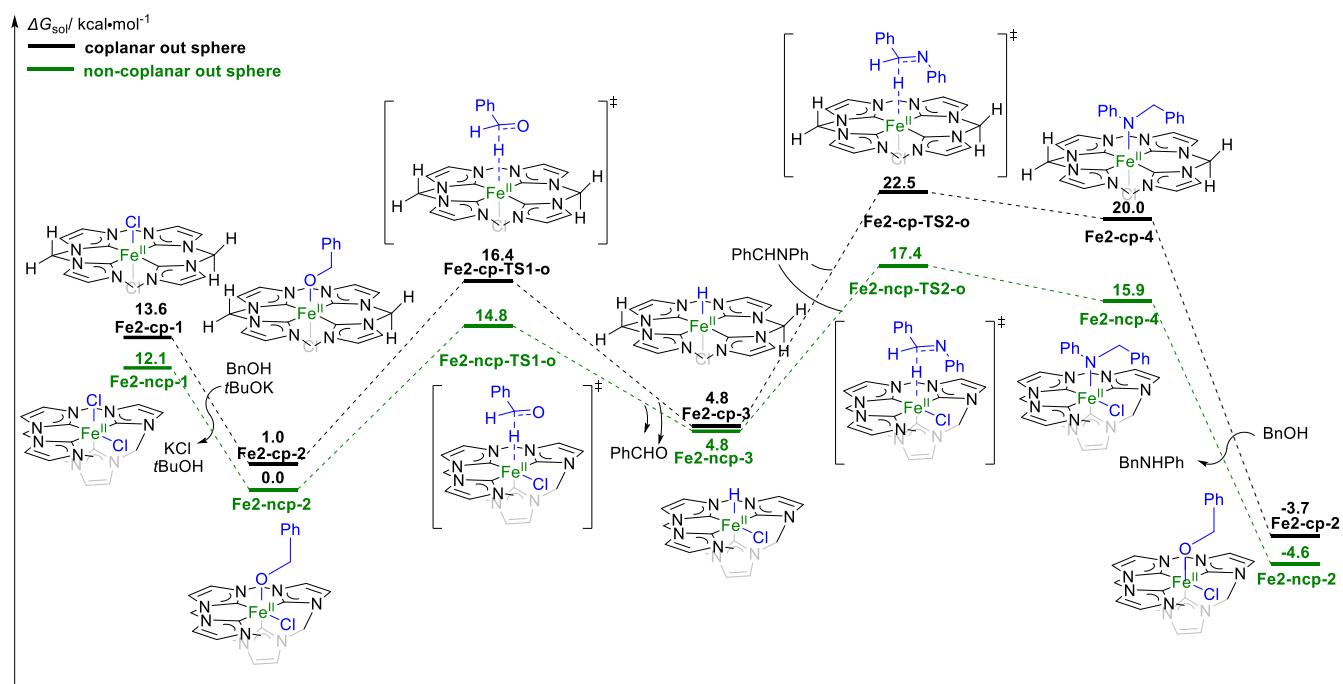



# 15. NMR spectra of products 4.

Scheme S8. <sup>1</sup>H-NMR spectrum of 4aa in CDCl<sub>3</sub>

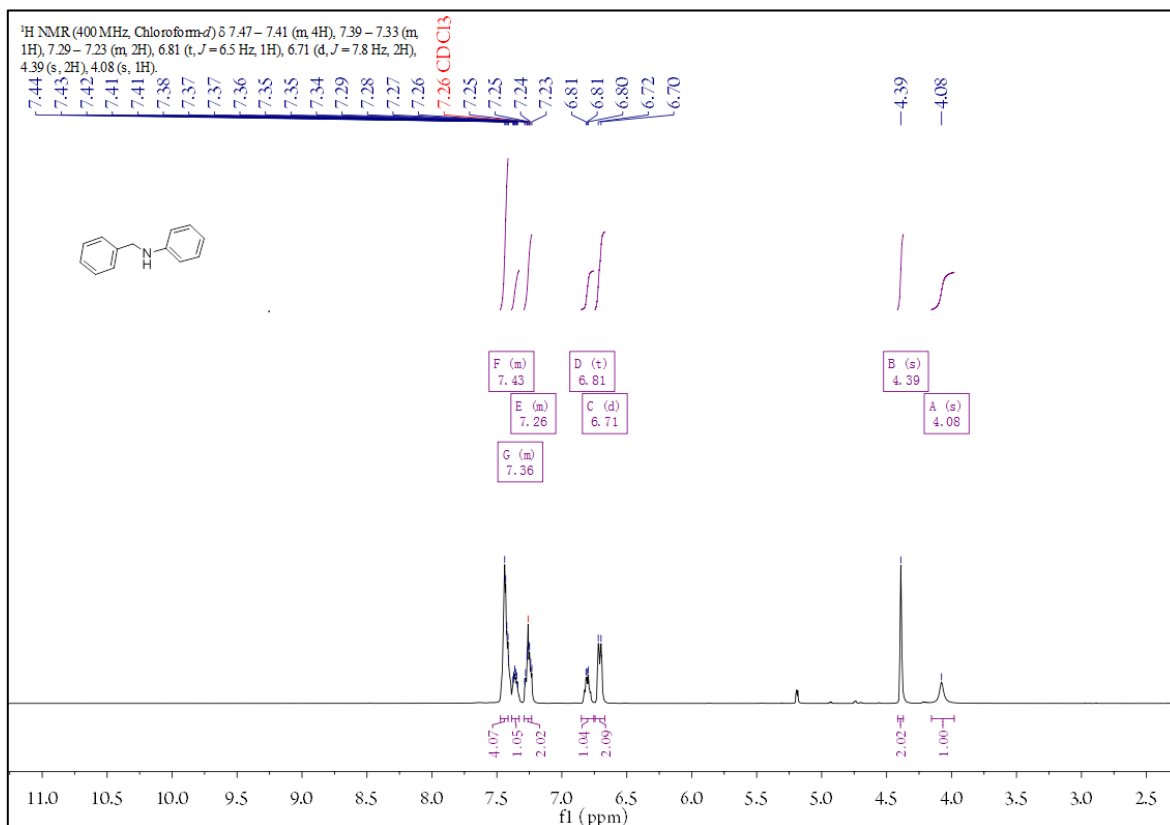

Scheme S9. <sup>1</sup>H-NMR spectrum of 4ba in CDCl<sub>3</sub>

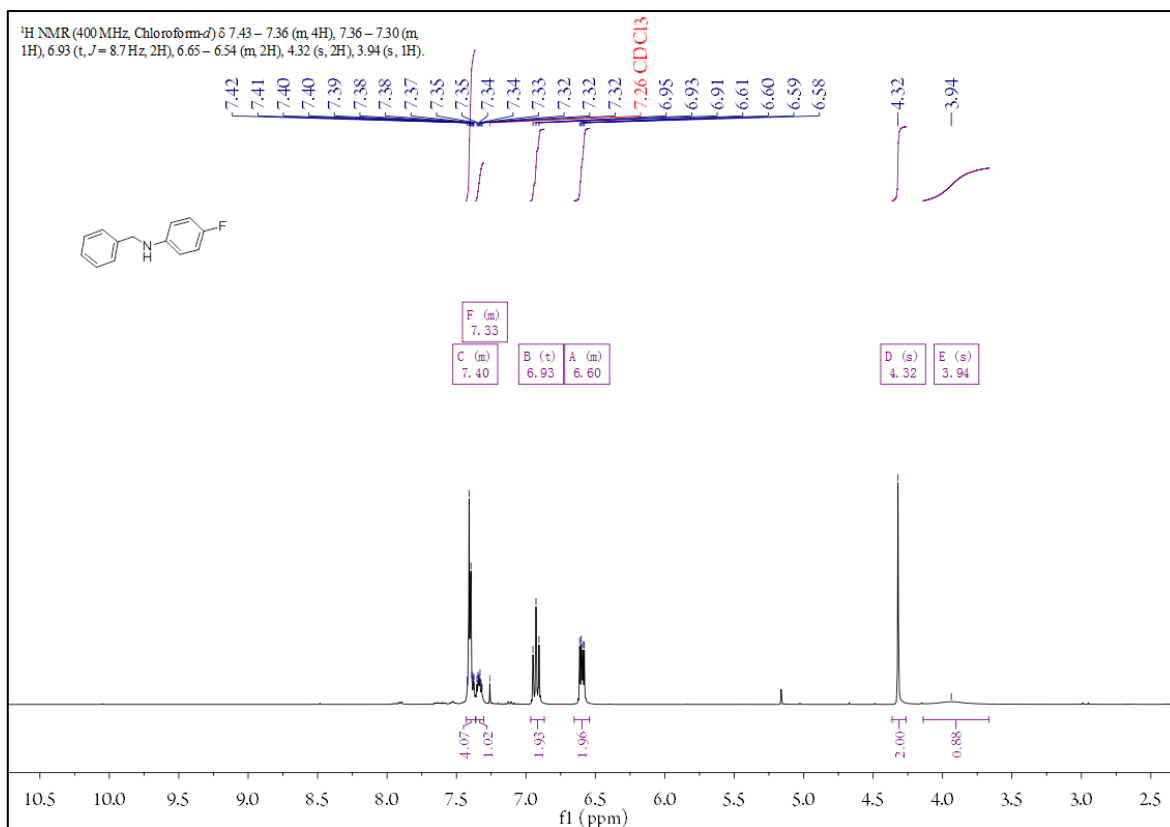

Scheme S10.  $^1\text{H-NMR}$  spectrum of 4ca in  $\text{CDCl}_3$

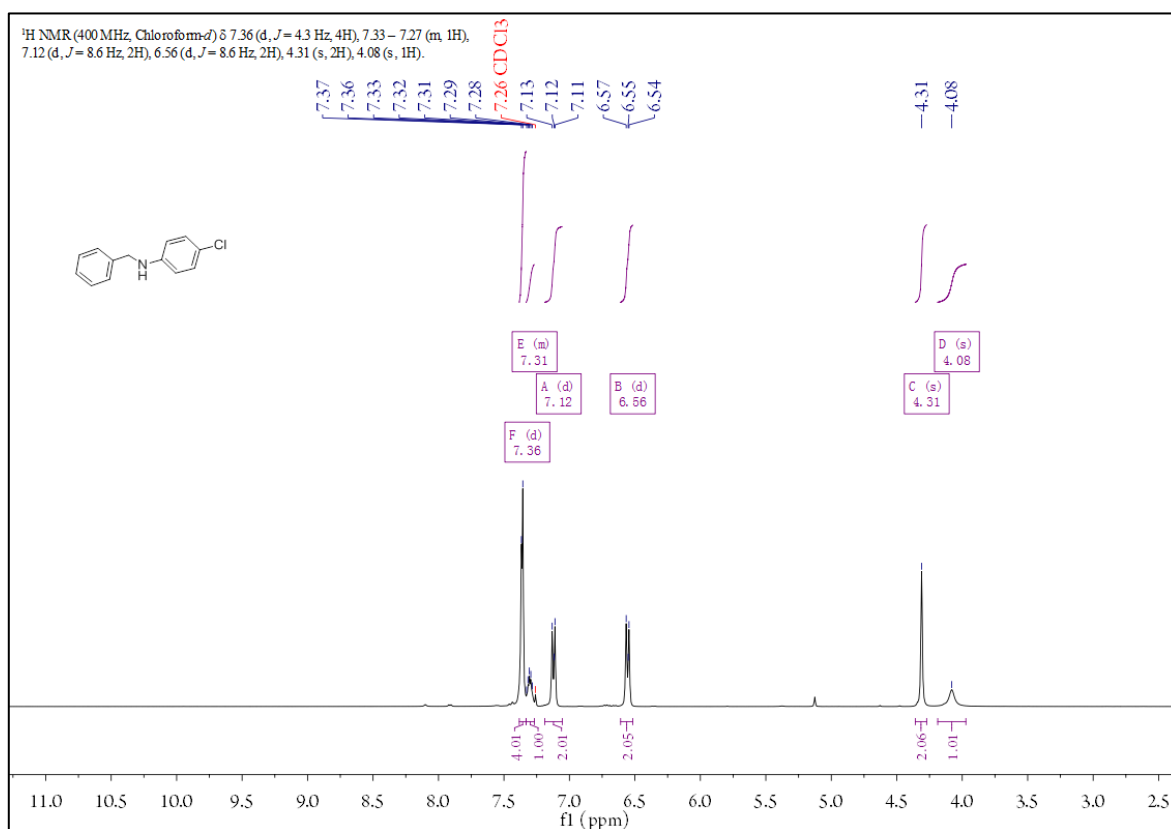

Scheme S11.  $^1\text{H-NMR}$  spectrum of 4da in  $\text{CDCl}_3$

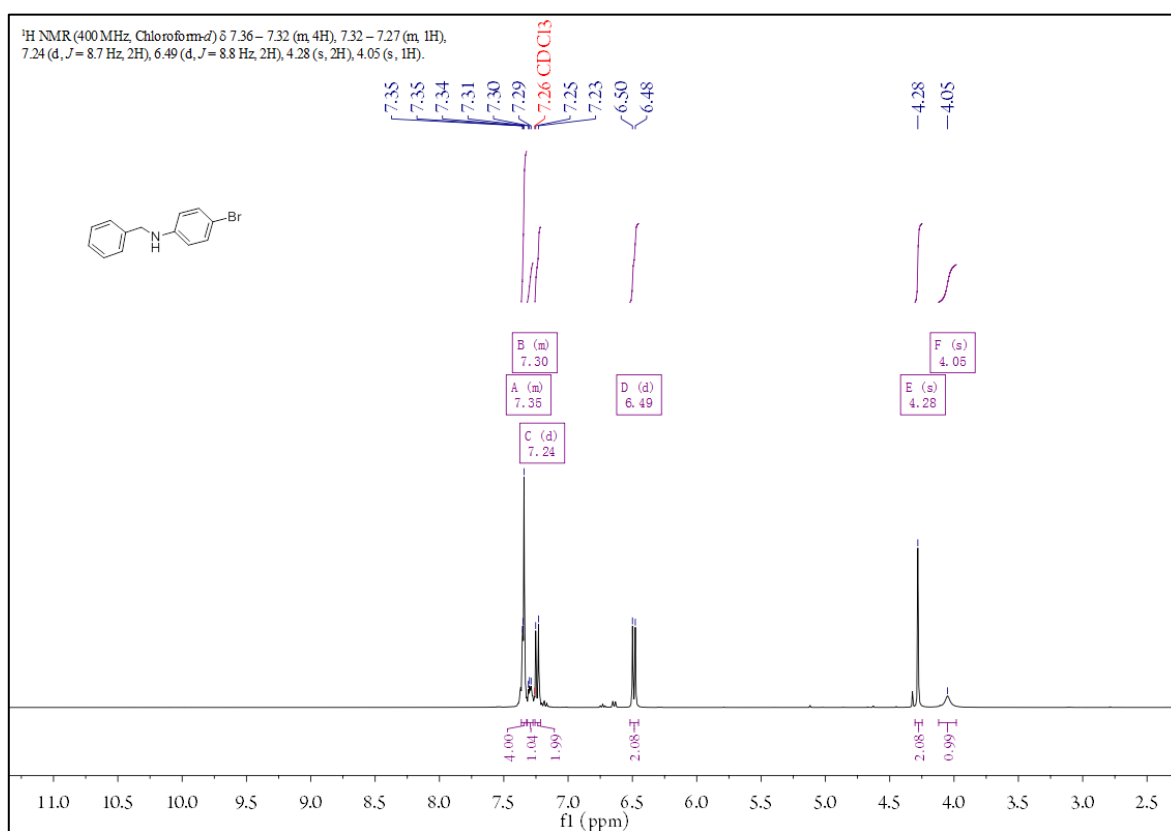

Scheme S12. <sup>1</sup>H-NMR spectrum of 4ea in CDCl<sub>3</sub>

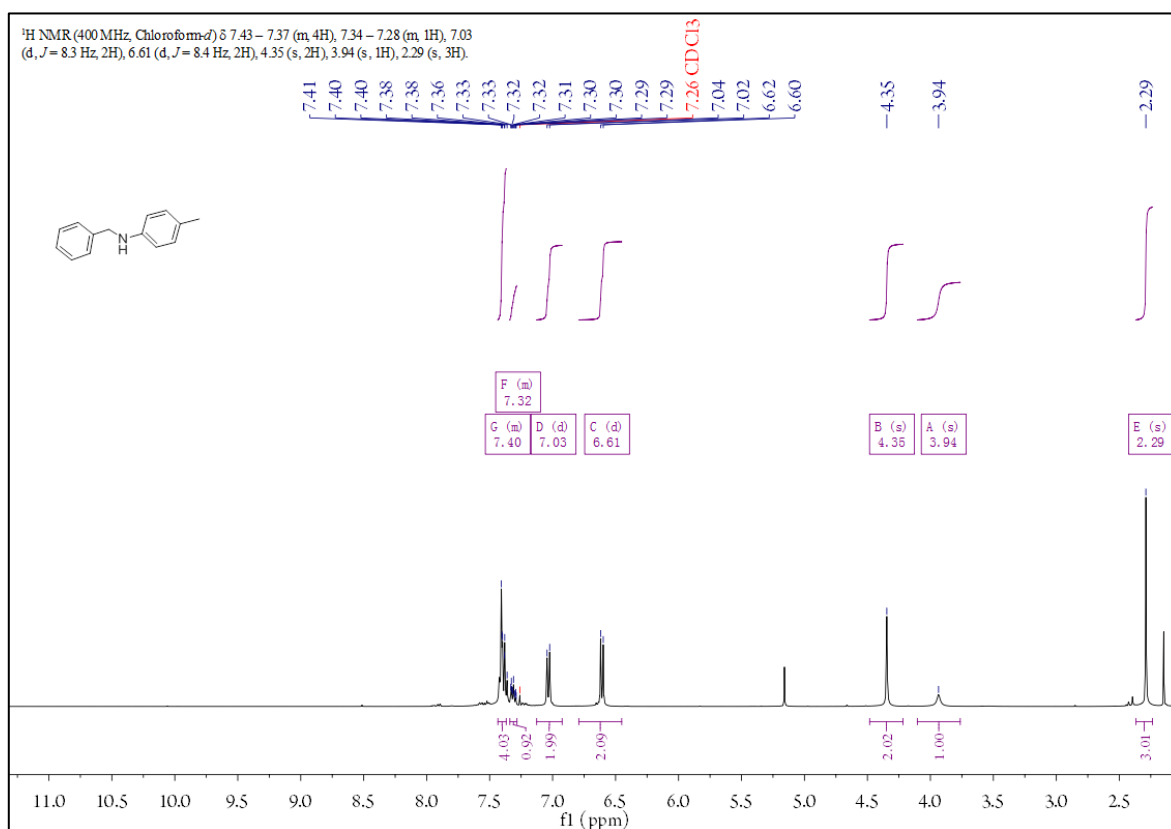

Scheme S13. <sup>1</sup>H-NMR spectrum of 4fa in CDCl<sub>3</sub>

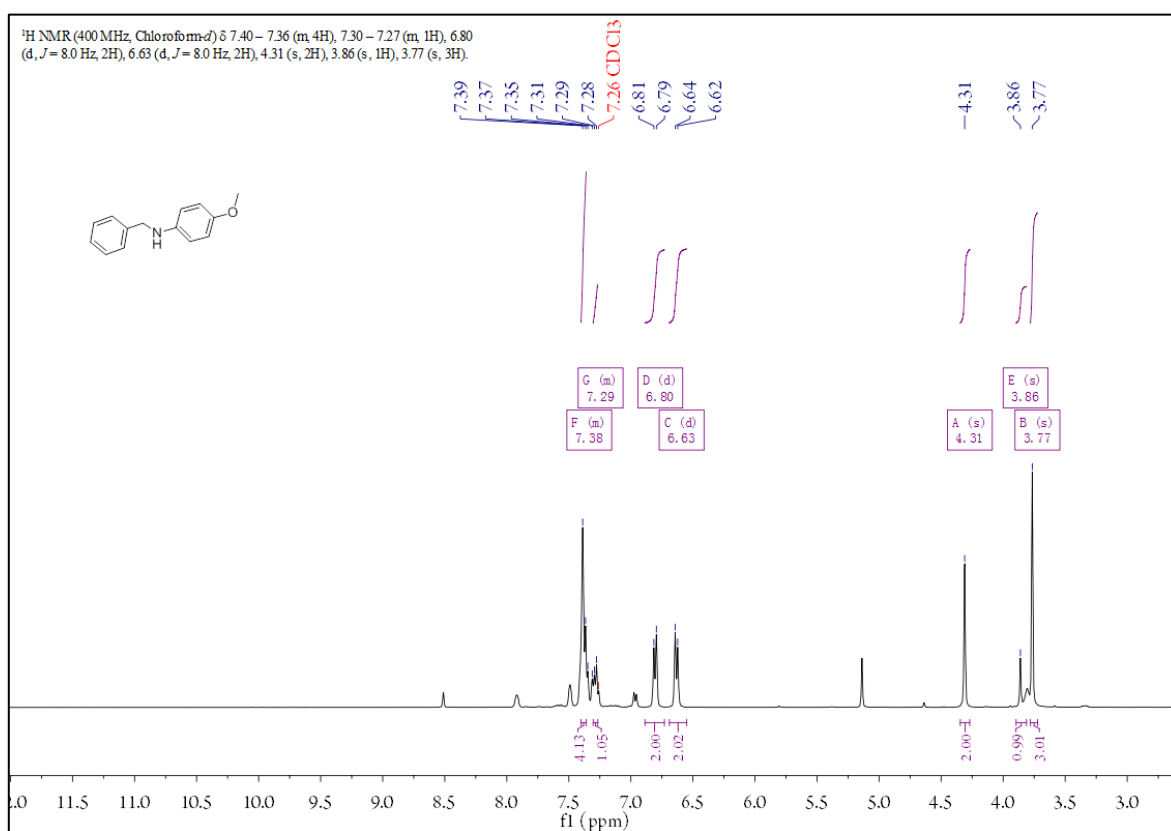

Scheme S14.  $^1\text{H-NMR}$  spectrum of 4ga in  $\text{CDCl}_3$

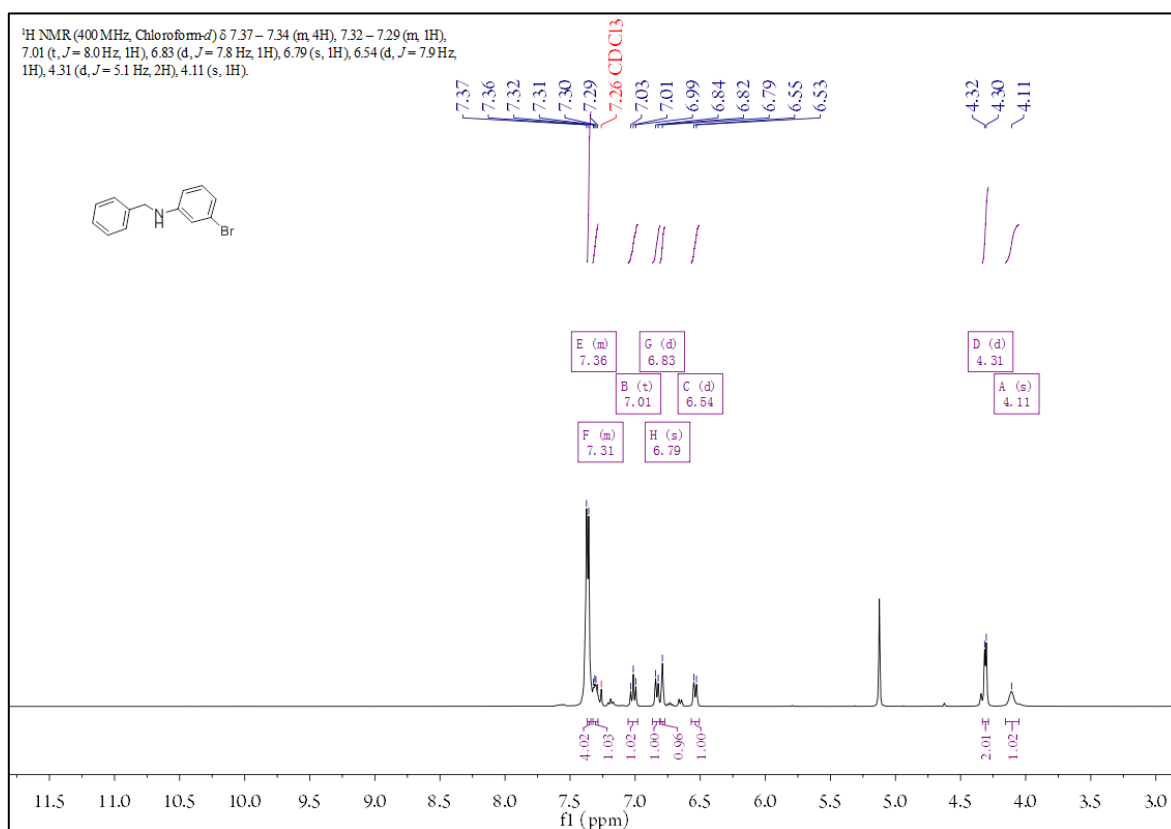

Scheme S15.  $^1\text{H-NMR}$  spectrum of 4ha in  $\text{CDCl}_3$

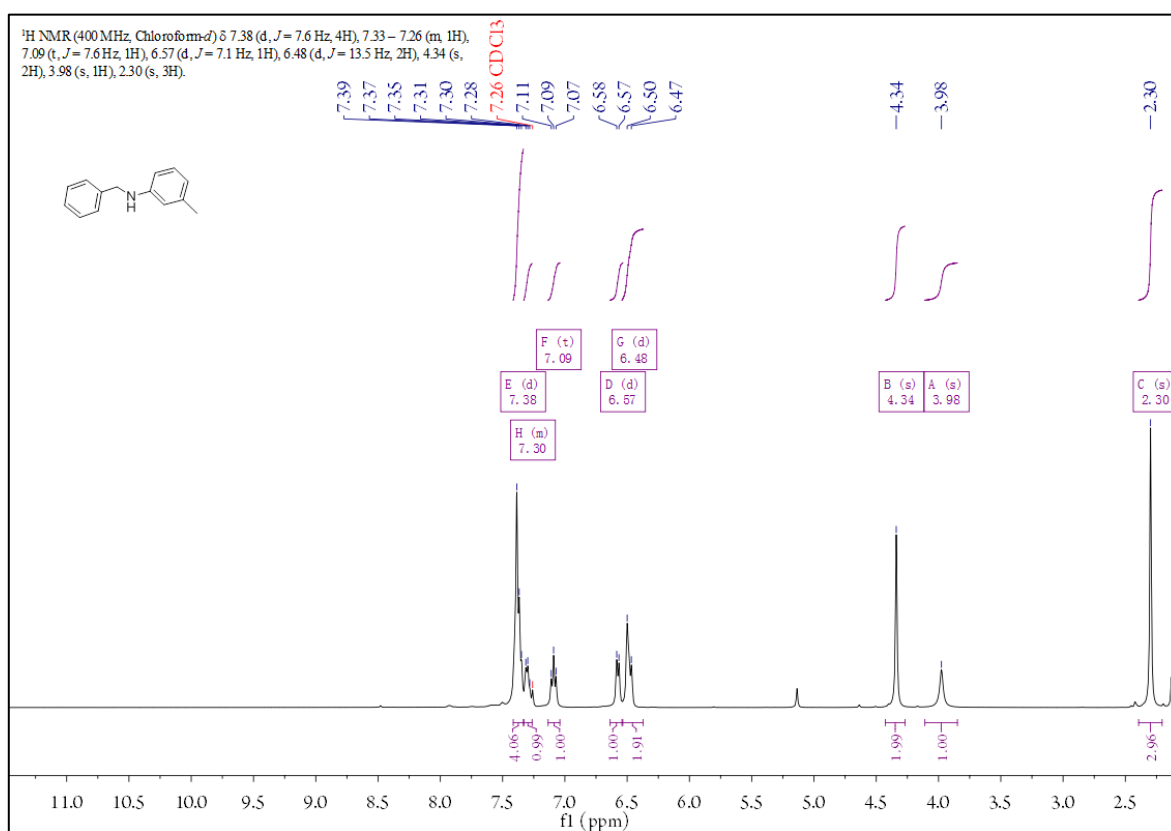

Scheme S16.  $^1\text{H-NMR}$  spectrum of 4ia in  $\text{CDCl}_3$

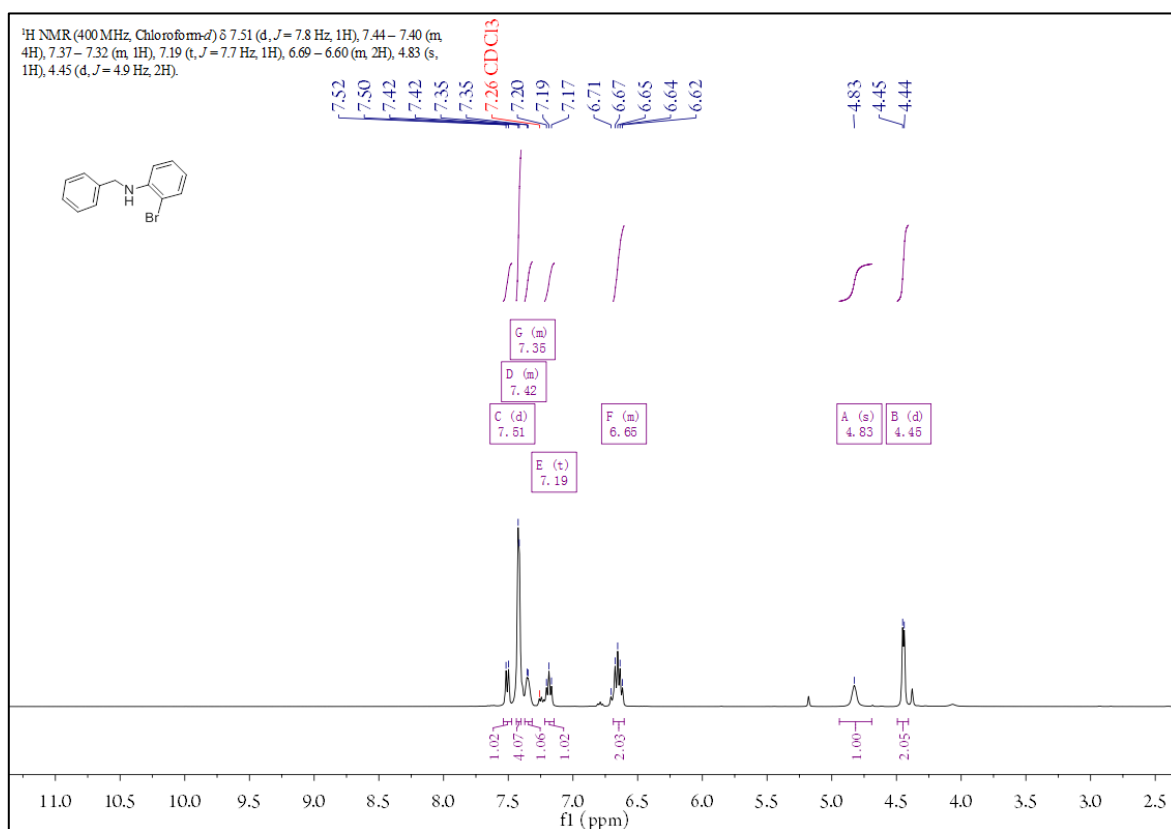

Scheme S17.  $^1\text{H-NMR}$  spectrum of 4ja in  $\text{CDCl}_3$

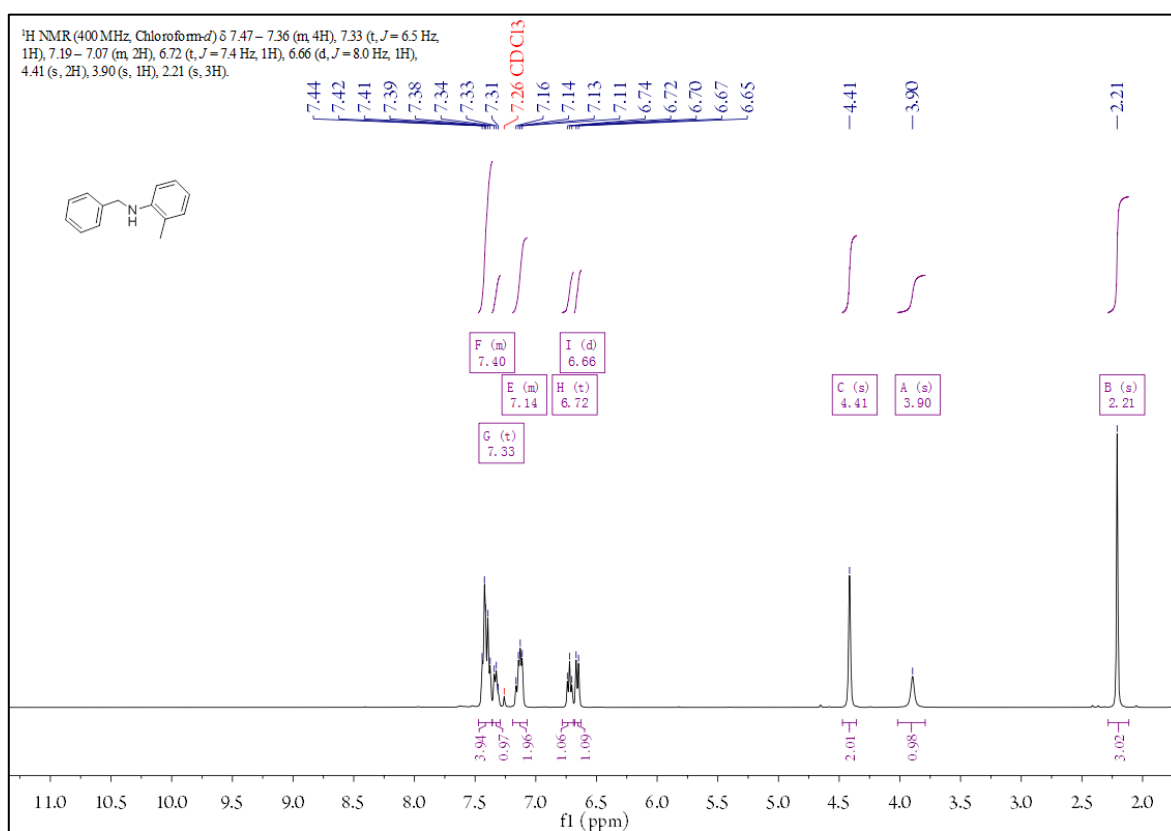

Scheme S18. <sup>1</sup>H-NMR spectrum of 4ka in CDCl<sub>3</sub>

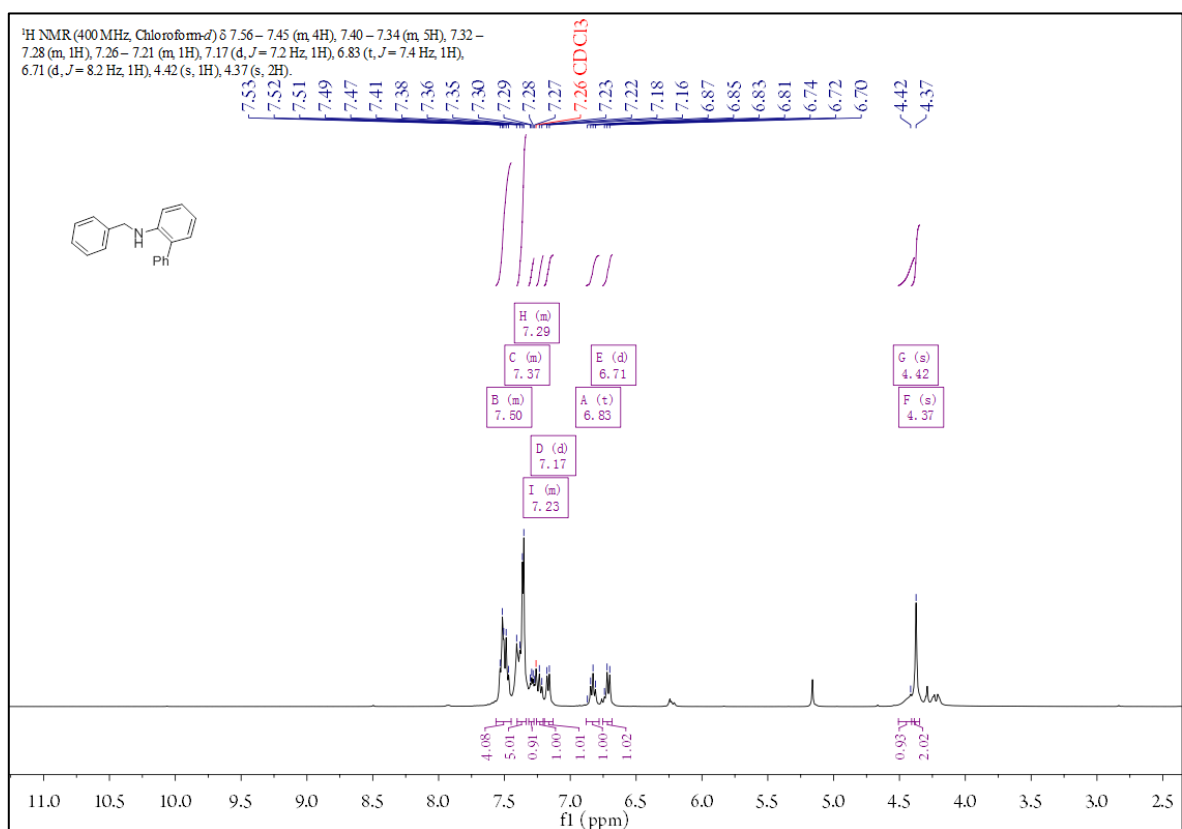

Scheme S19. <sup>1</sup>H-NMR spectrum of 4na in CDCl<sub>3</sub>

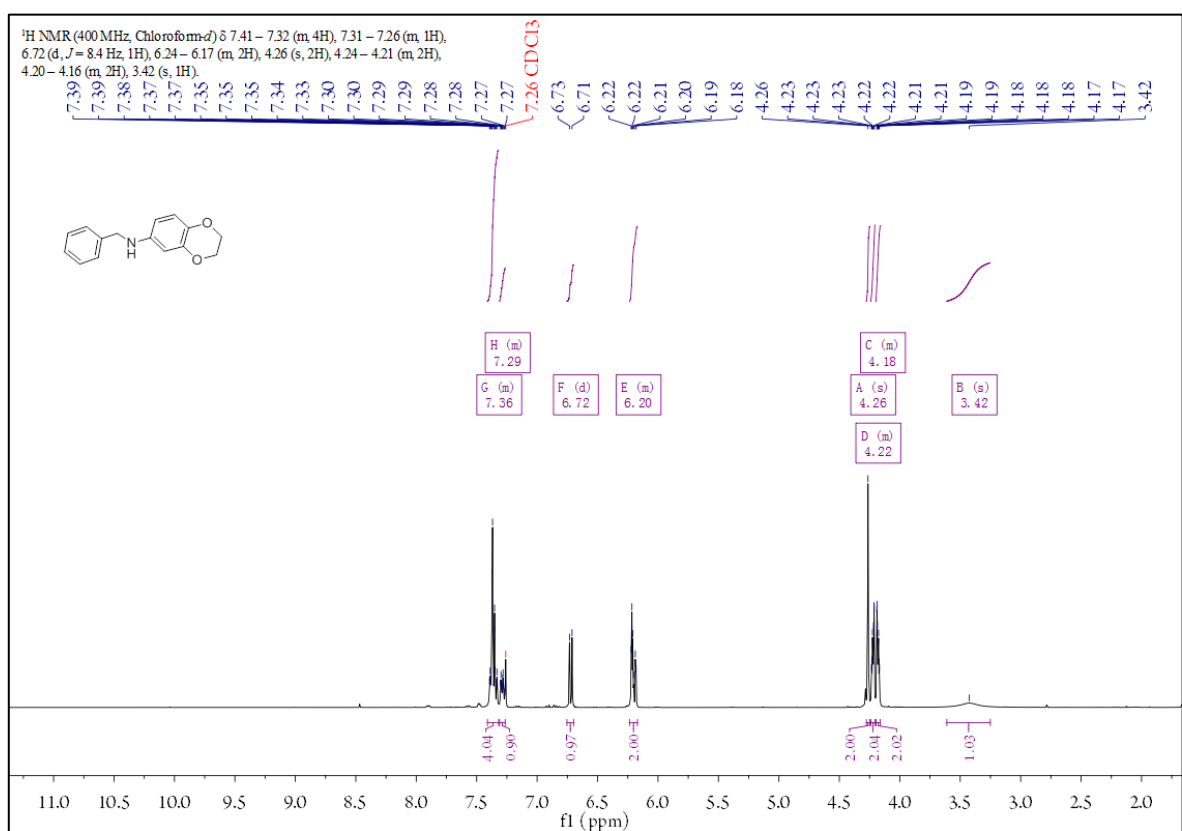

Scheme S20. <sup>1</sup>H-NMR spectrum of 4oa in CDCl<sub>3</sub>

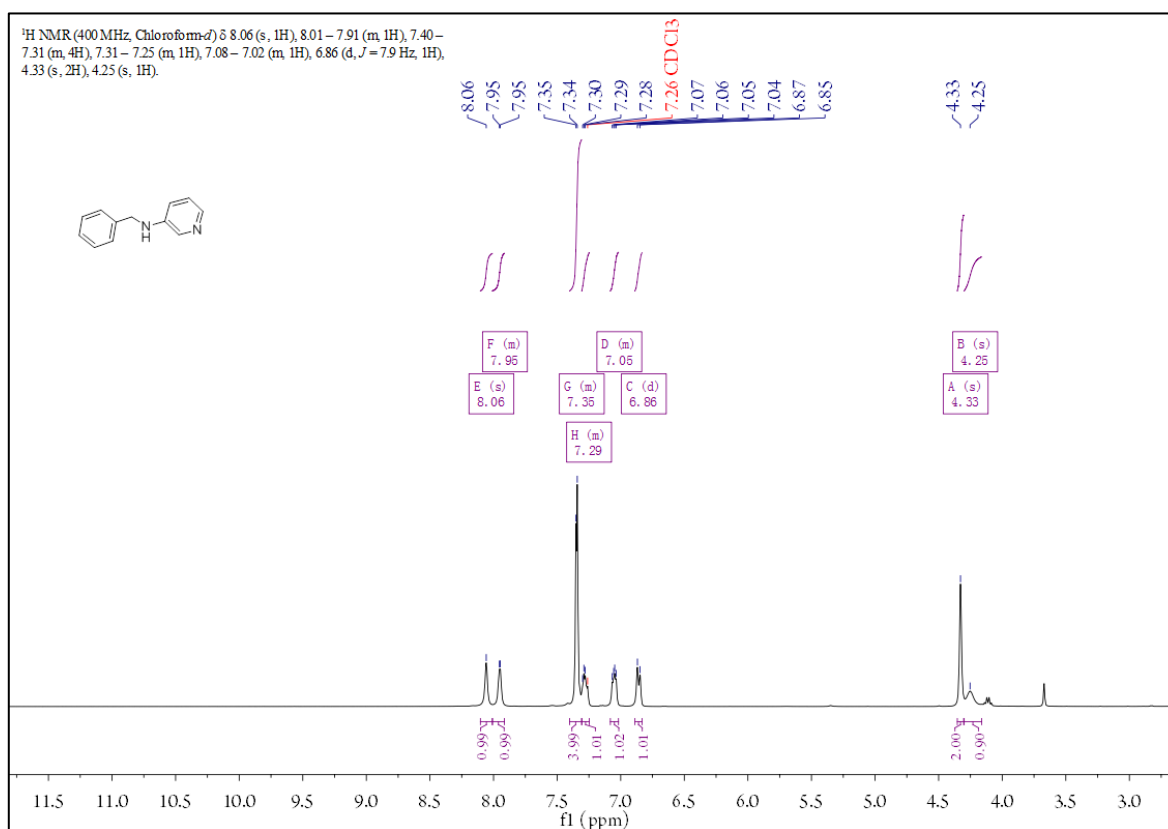

Scheme S21. <sup>1</sup>H-NMR spectrum of 4ra in CDCl<sub>3</sub>

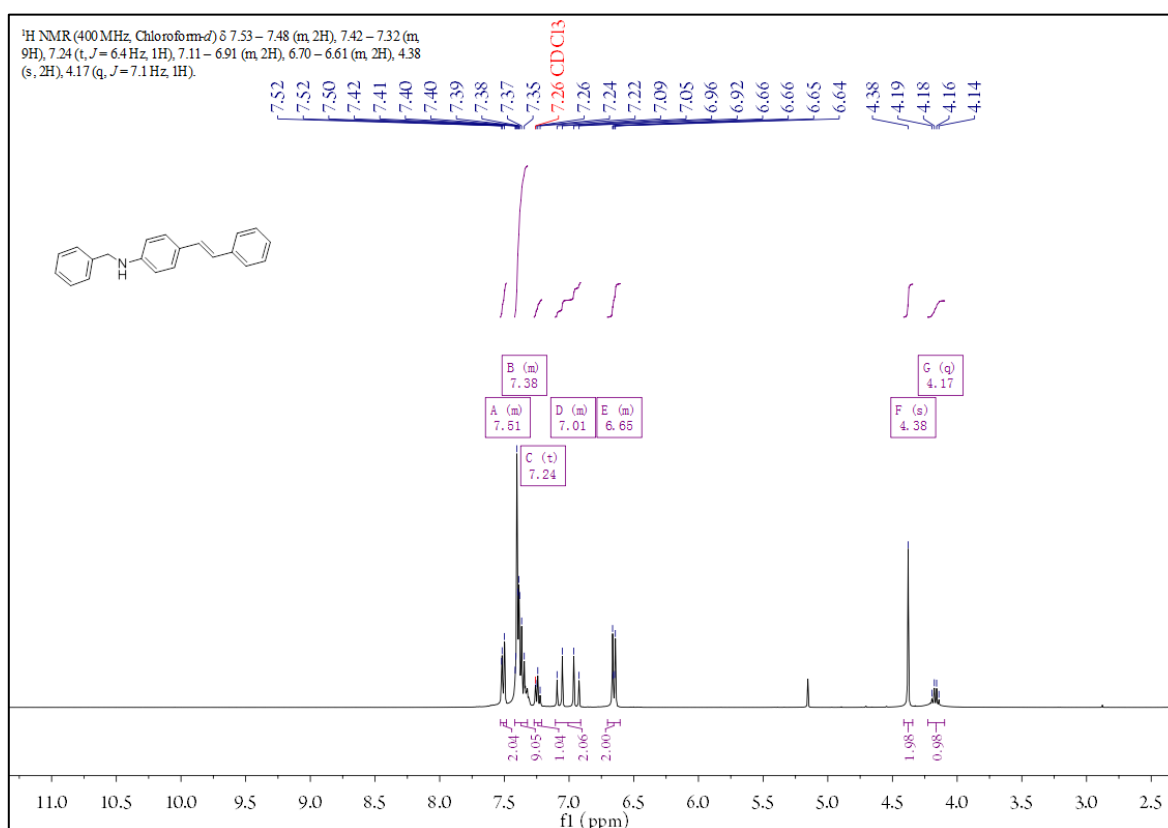

Scheme S22. <sup>1</sup>H-NMR spectrum of 4ta in CDCl<sub>3</sub>

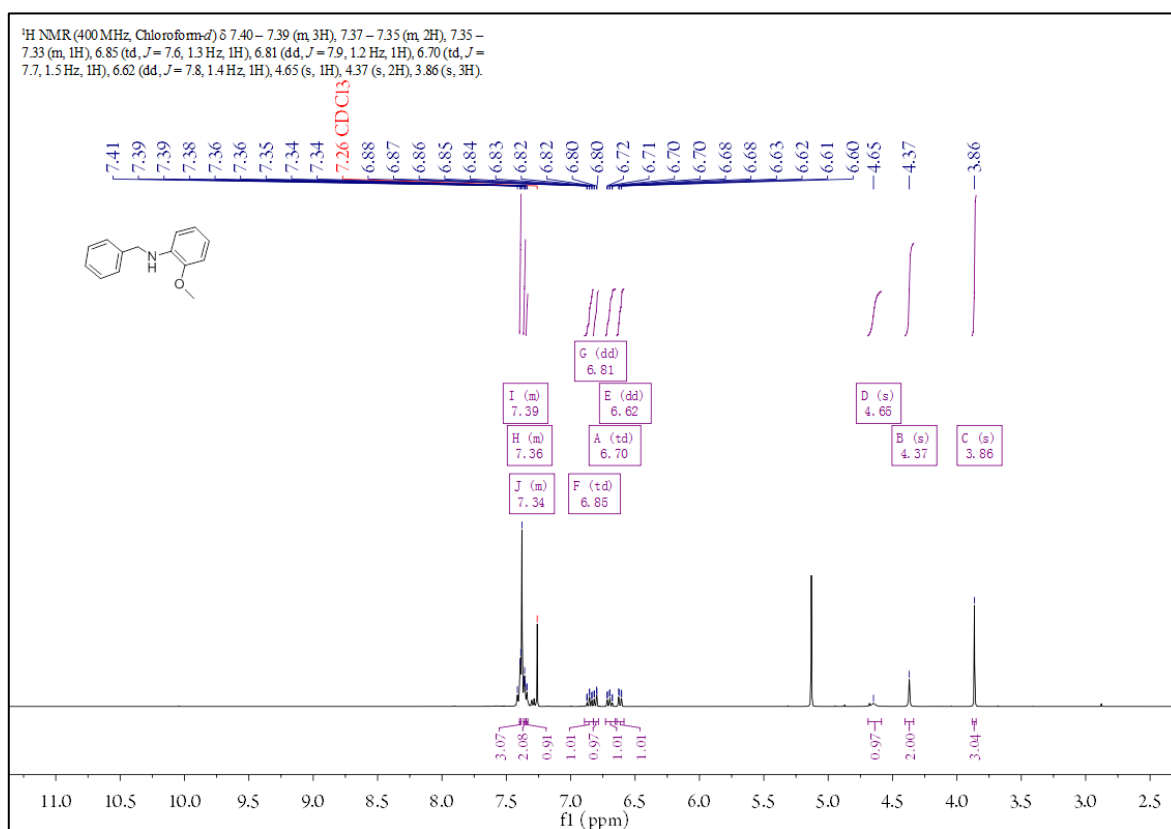

Scheme S23. <sup>1</sup>H-NMR spectrum of 4ua in CDCl<sub>3</sub>

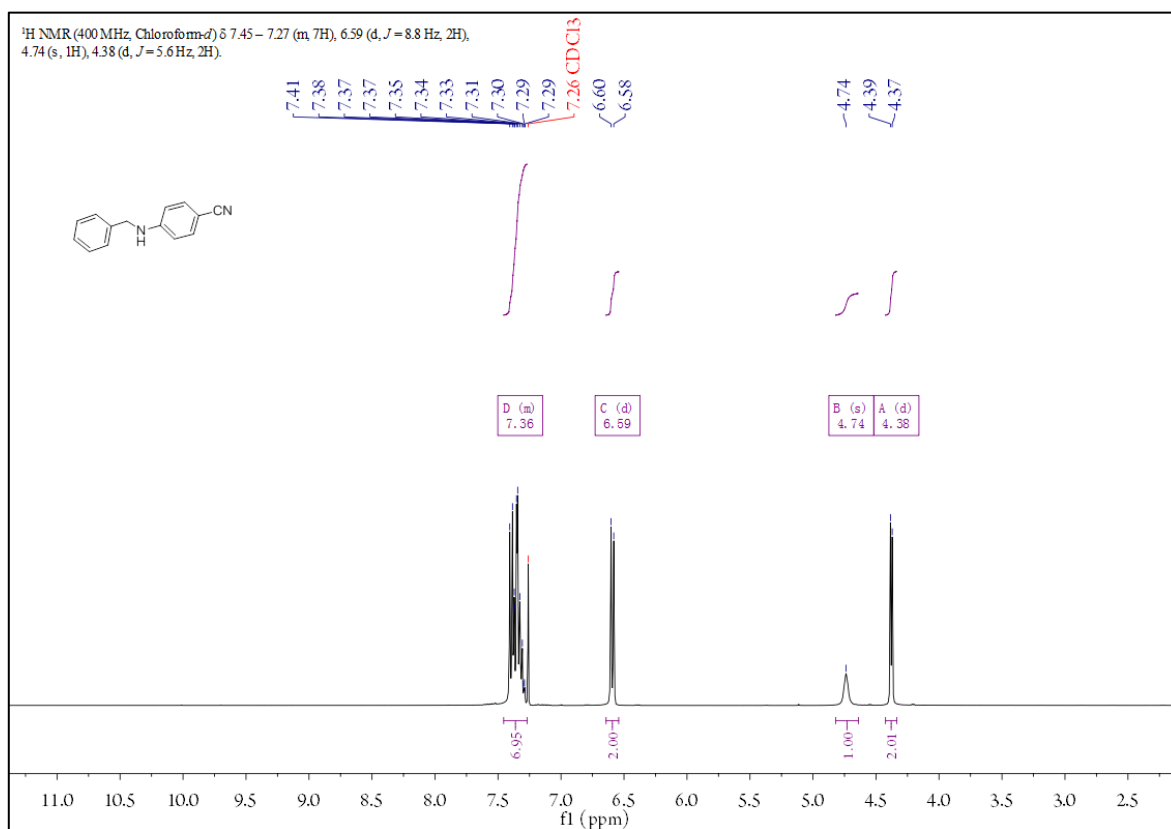



Scheme S24.  $^1\text{H-NMR}$  spectrum of 4ab in  $\text{CDCl}_3$

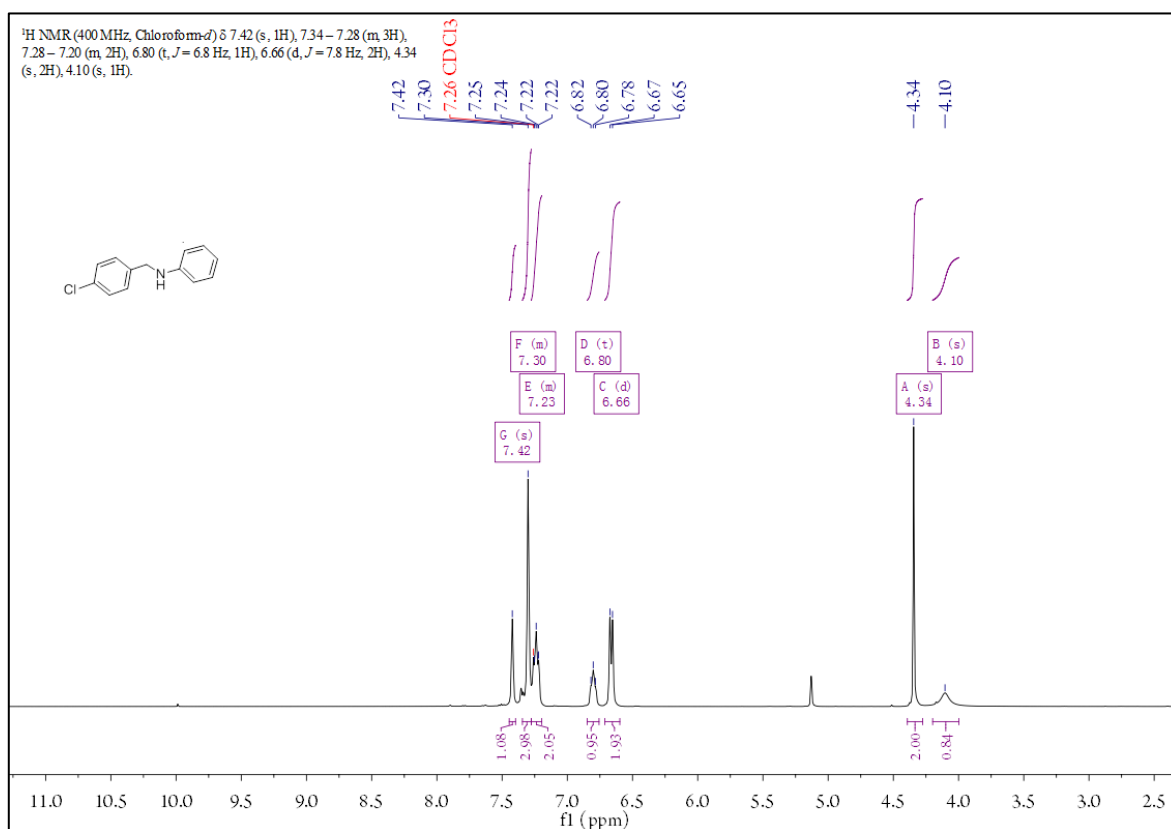

Scheme S25.  $^1\text{H-NMR}$  spectrum of 4ac in  $\text{CDCl}_3$

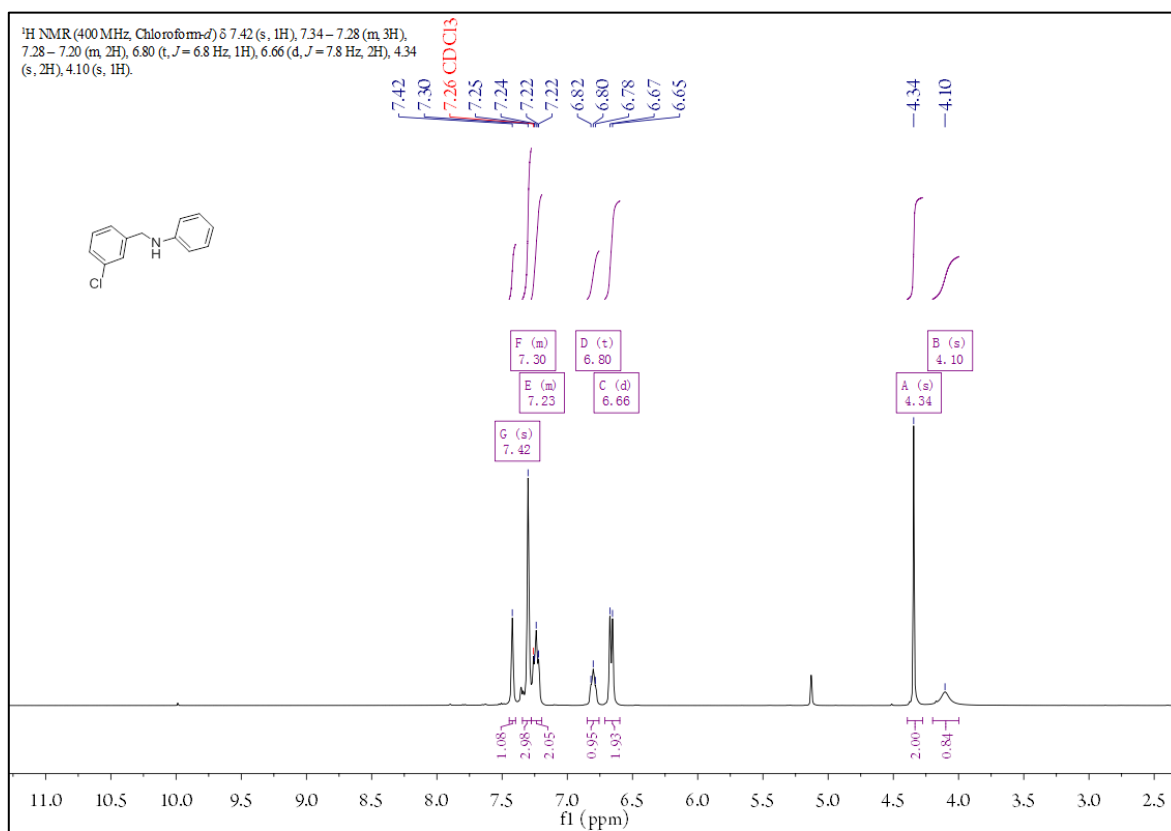

Scheme S26.  $^1\text{H-NMR}$  spectrum of 4ad in  $\text{CDCl}_3$

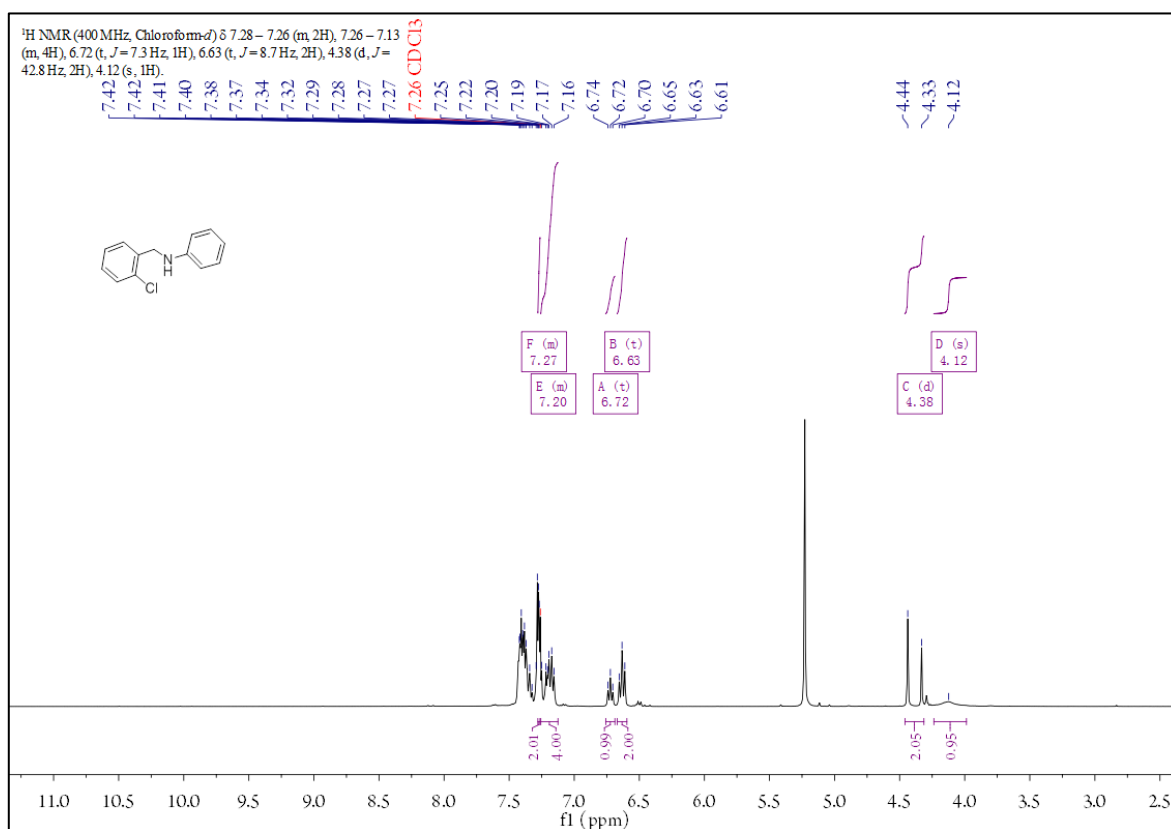

Scheme S27.  $^1\text{H-NMR}$  spectrum of 4ae in  $\text{CDCl}_3$

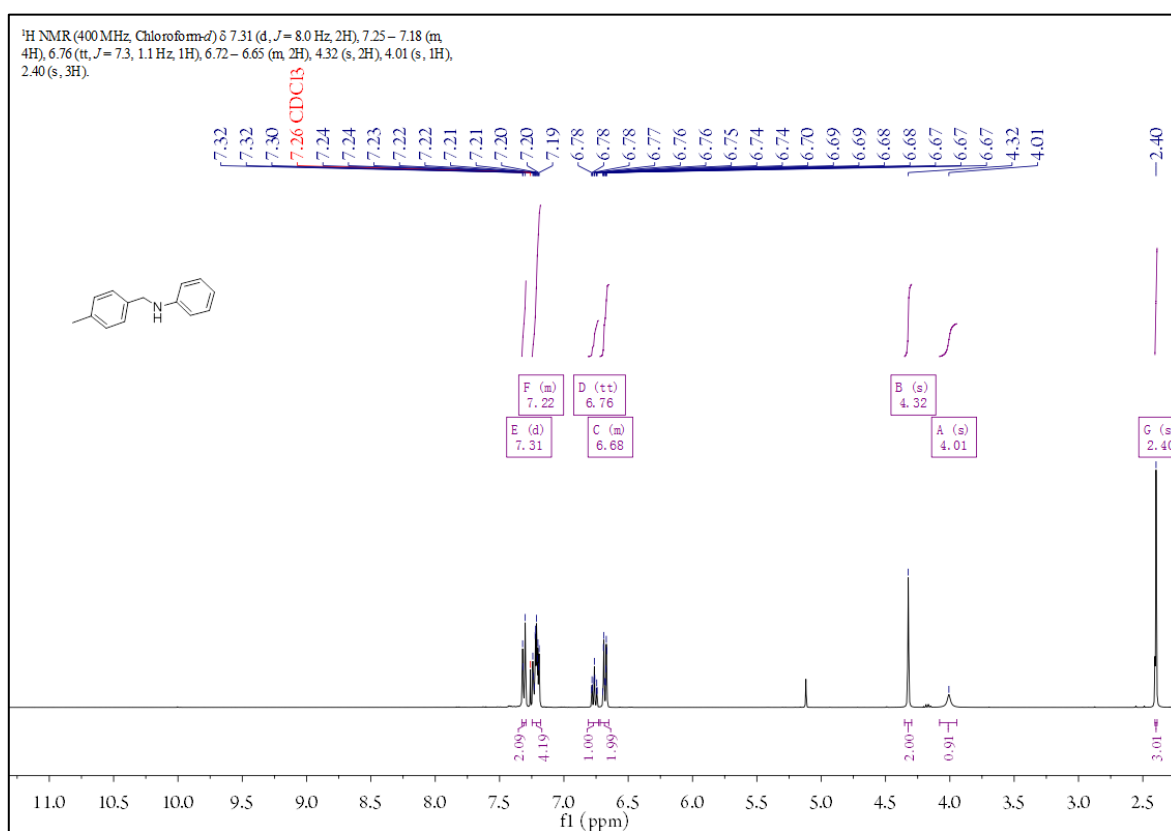

Scheme S28. <sup>1</sup>H-NMR spectrum of 4af in CDCl<sub>3</sub>

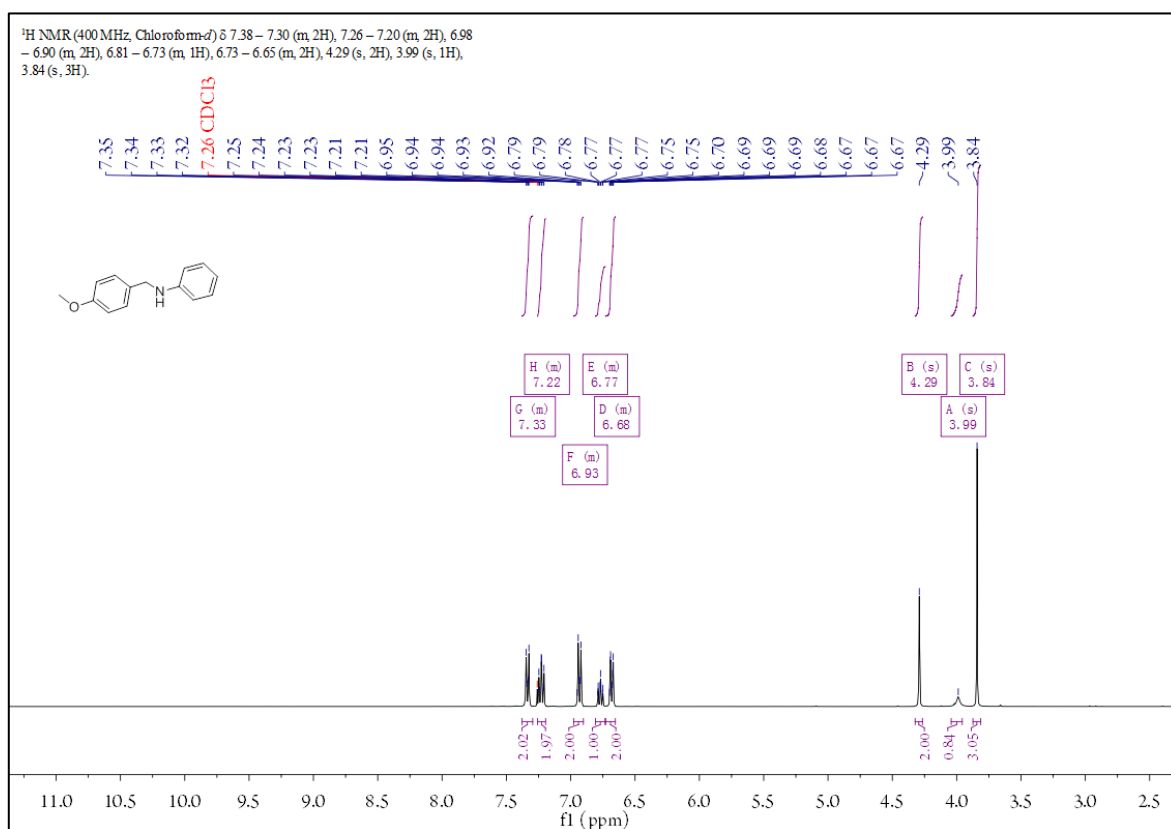

Scheme S29. <sup>1</sup>H-NMR spectrum of 4ag in CDCl<sub>3</sub>

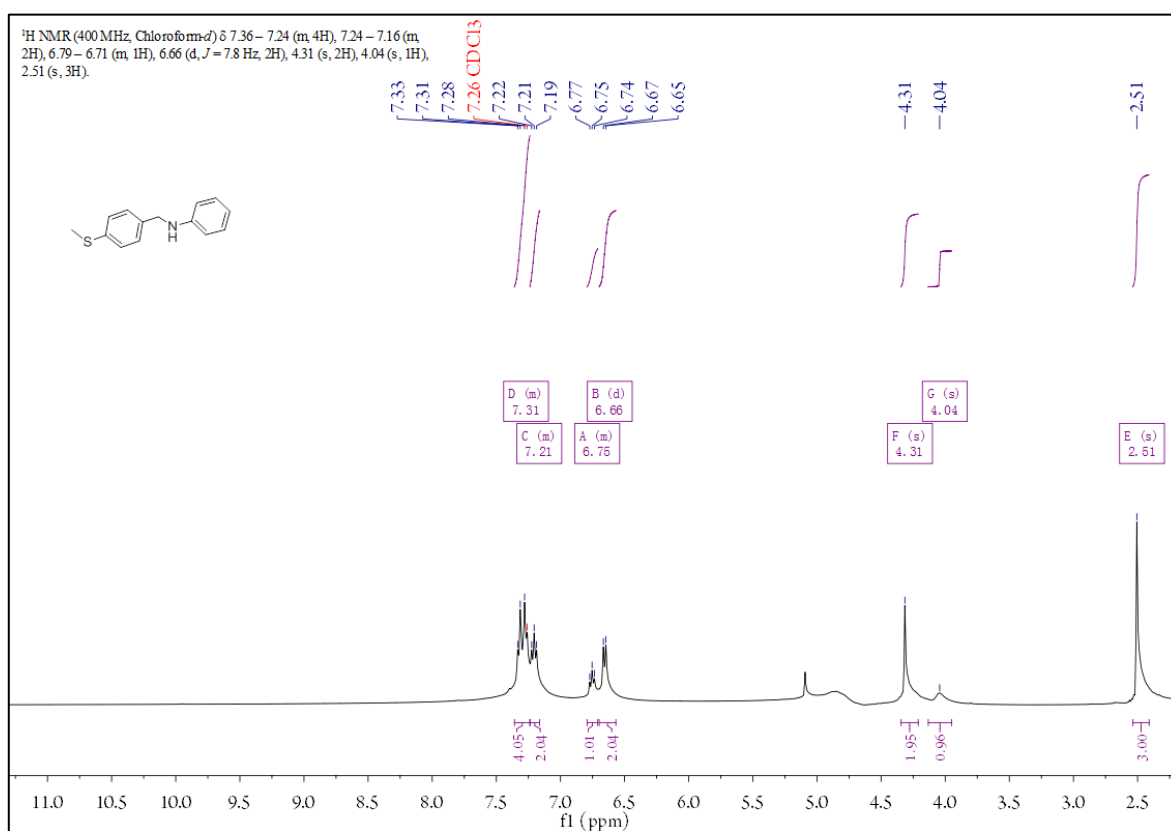

Scheme S30. <sup>1</sup>H-NMR spectrum of 4ah in CDCl<sub>3</sub>

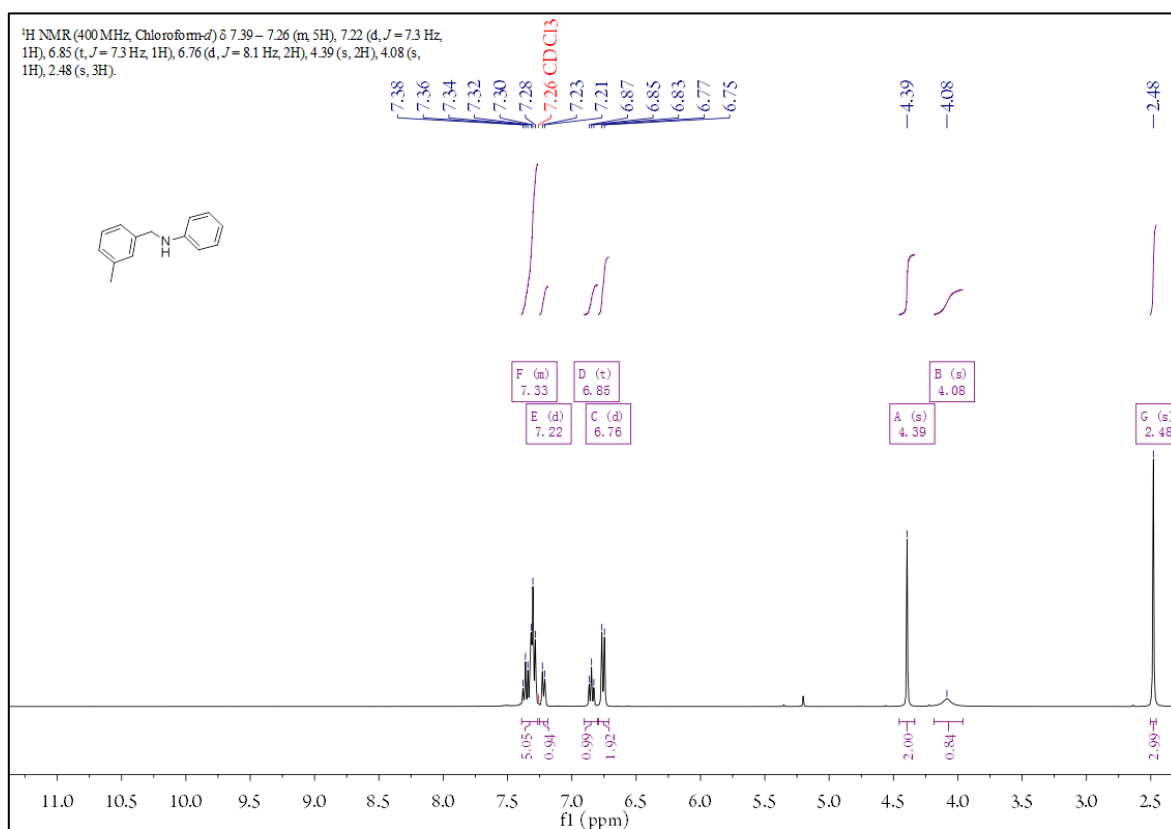

Scheme S31. <sup>1</sup>H-NMR spectrum of 4ai in CDCl<sub>3</sub>

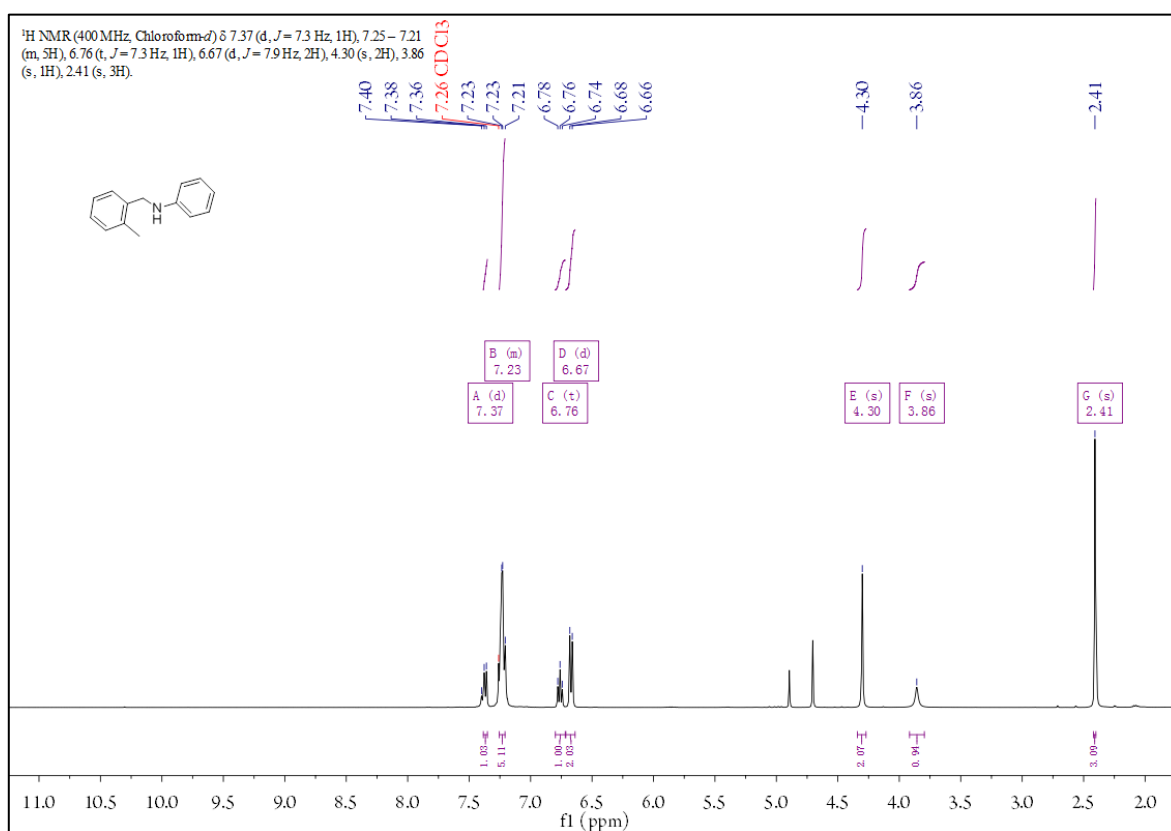

Scheme S32. <sup>1</sup>H-NMR spectrum of 4aj in CDCl<sub>3</sub>

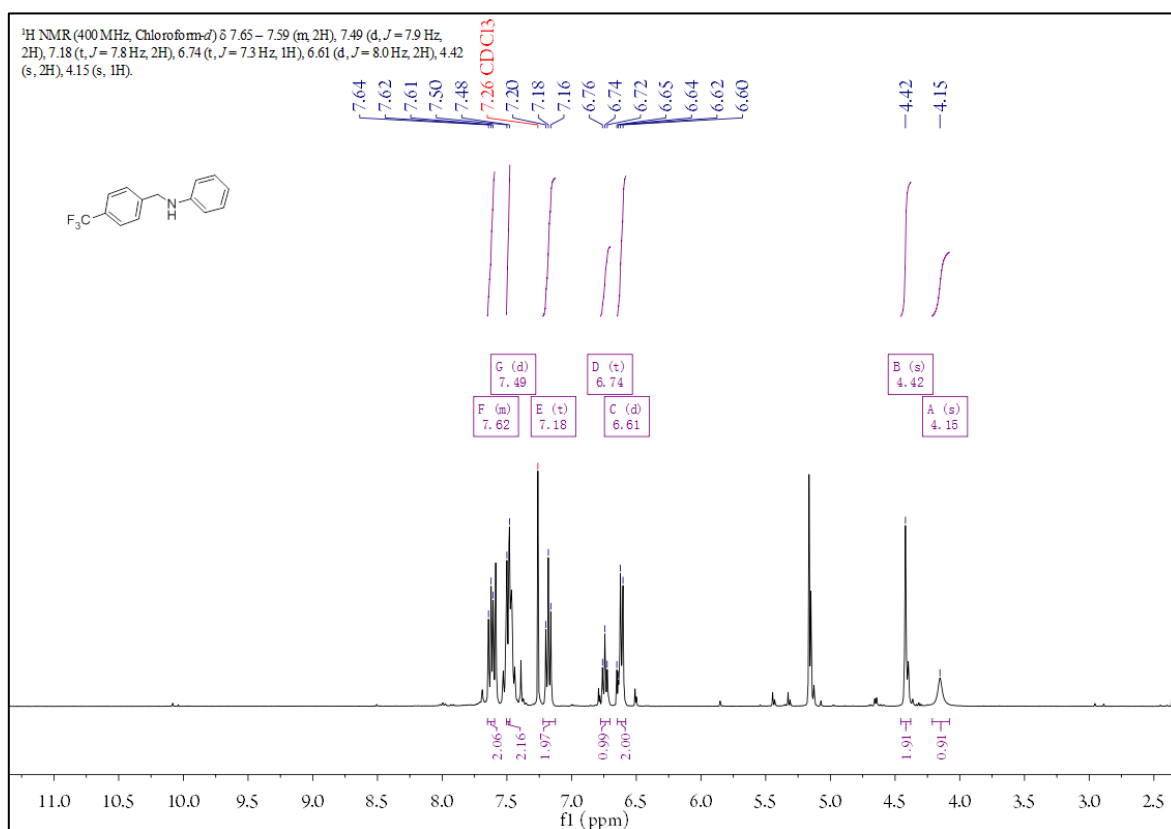

Scheme S33. <sup>1</sup>H-NMR spectrum of 4ak in CDCl<sub>3</sub>

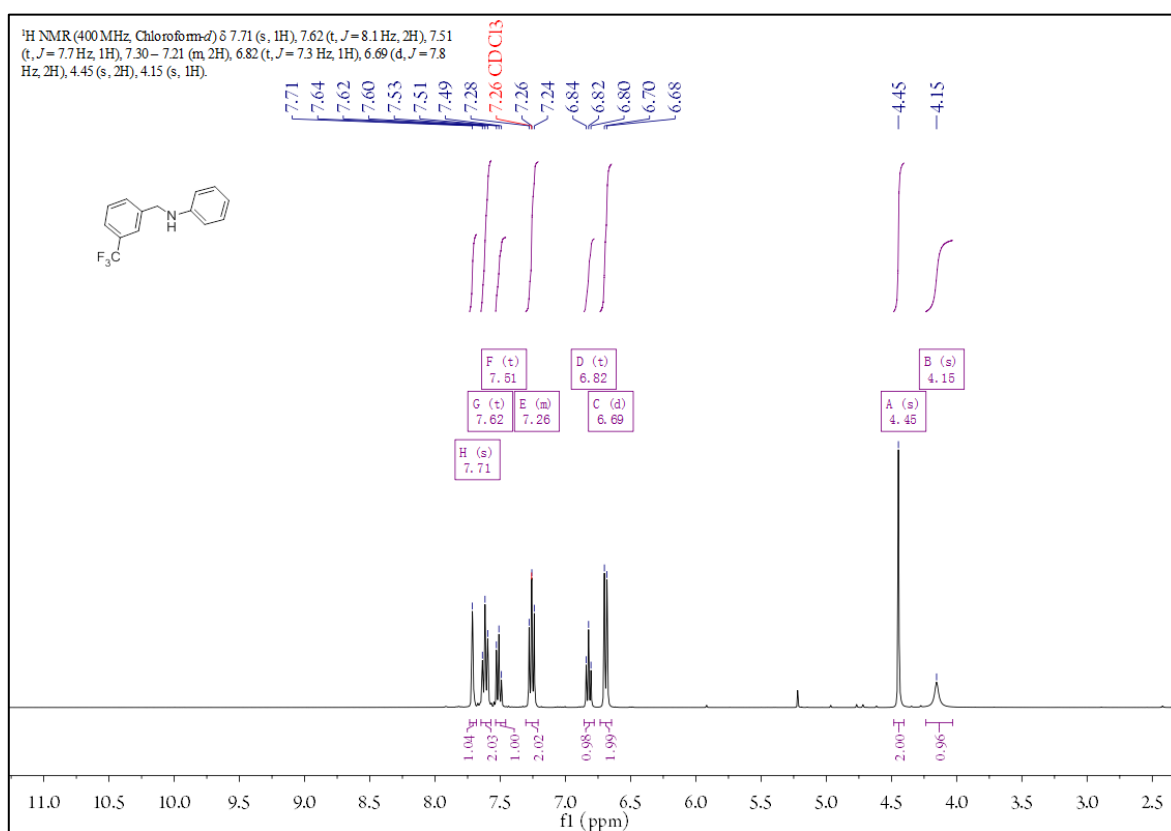

Scheme S34.  $^1\text{H-NMR}$  spectrum of 4al in  $\text{CDCl}_3$

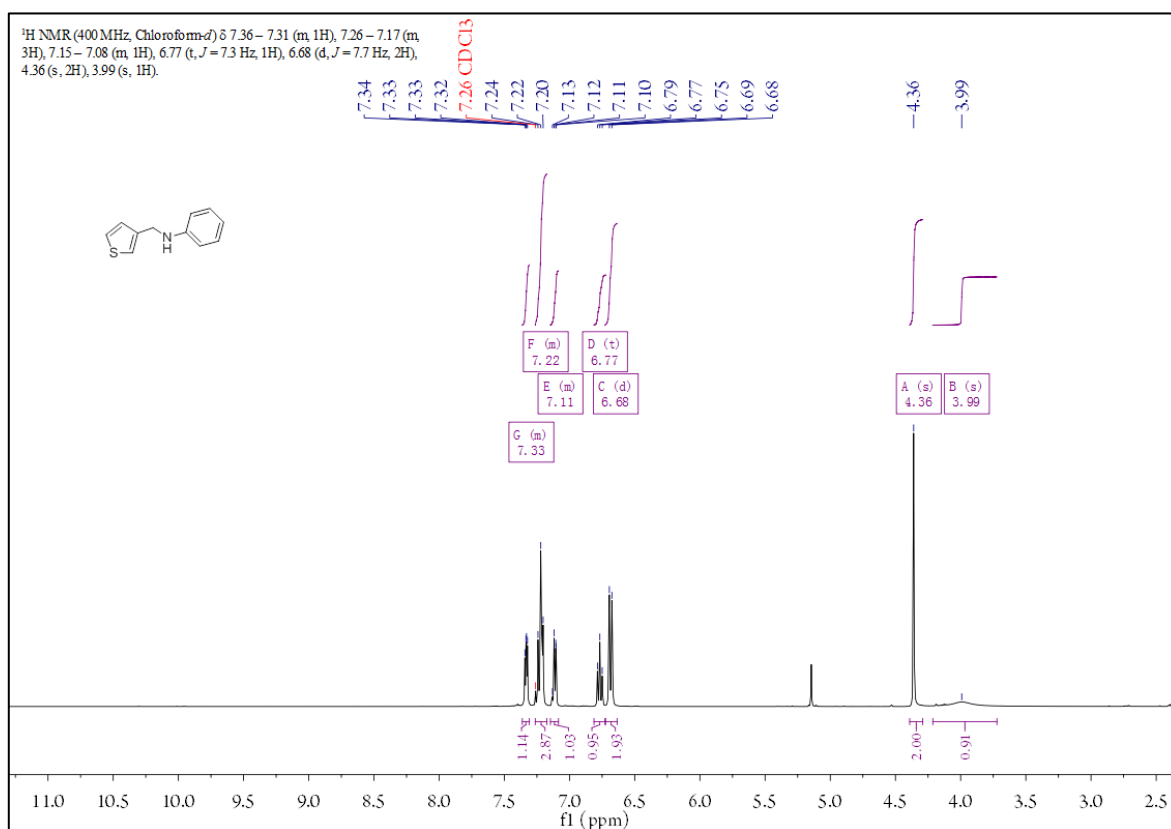

Scheme S35.  $^1\text{H-NMR}$  spectrum of 4am in  $\text{CDCl}_3$

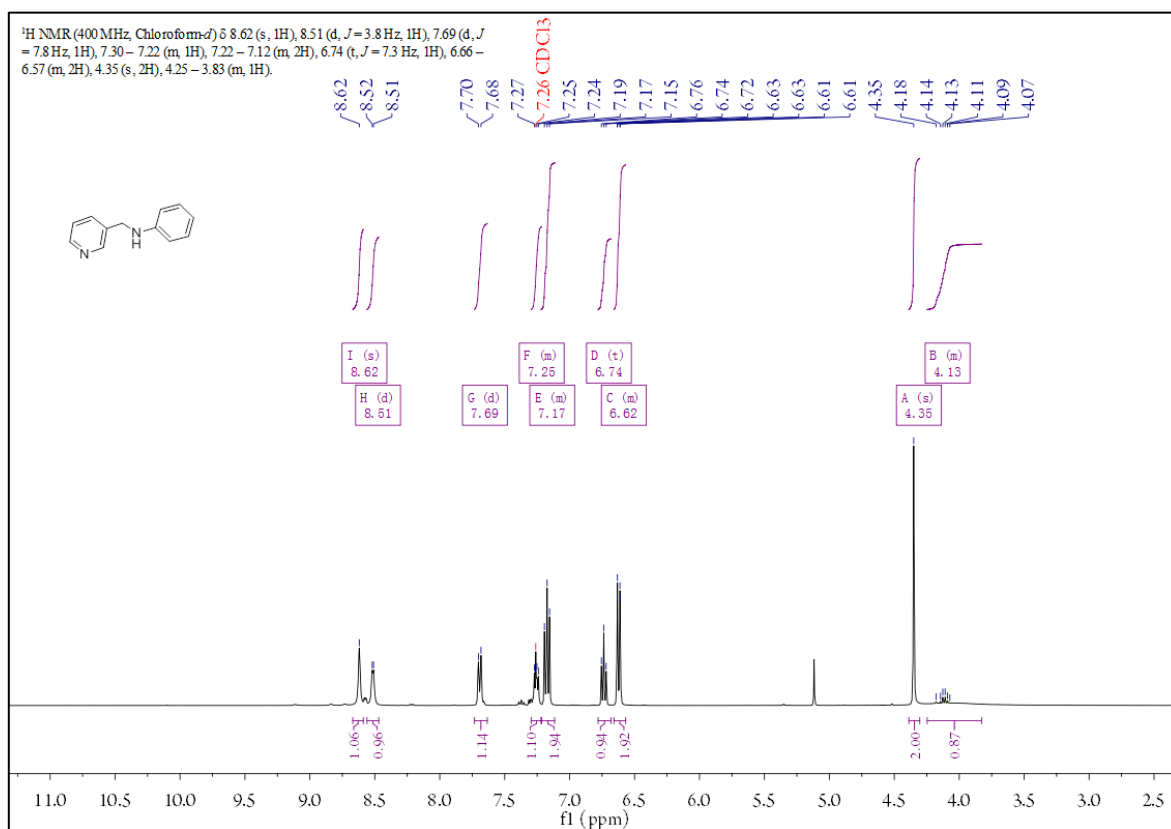

Scheme S36.  $^1\text{H-NMR}$  spectrum of 4ao in  $\text{CDCl}_3$

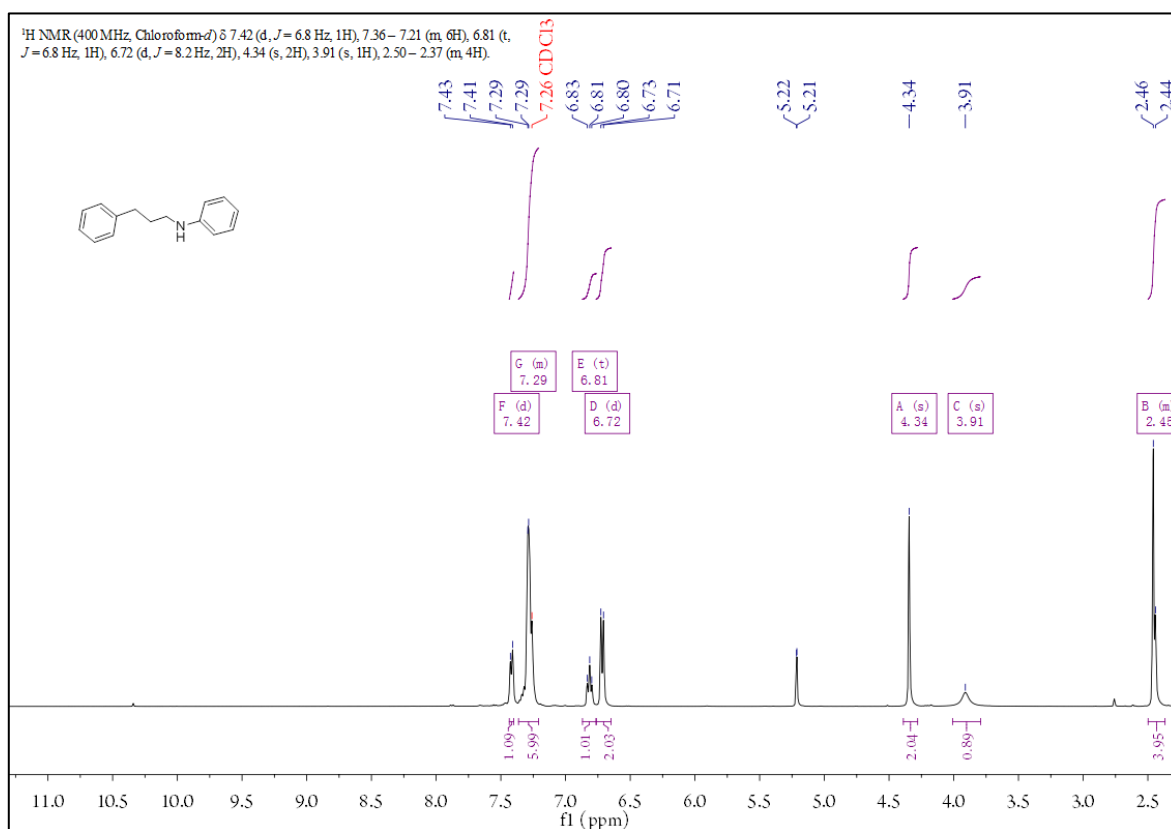

Scheme S37.  $^1\text{H-NMR}$  spectrum of 4ap in  $\text{CDCl}_3$

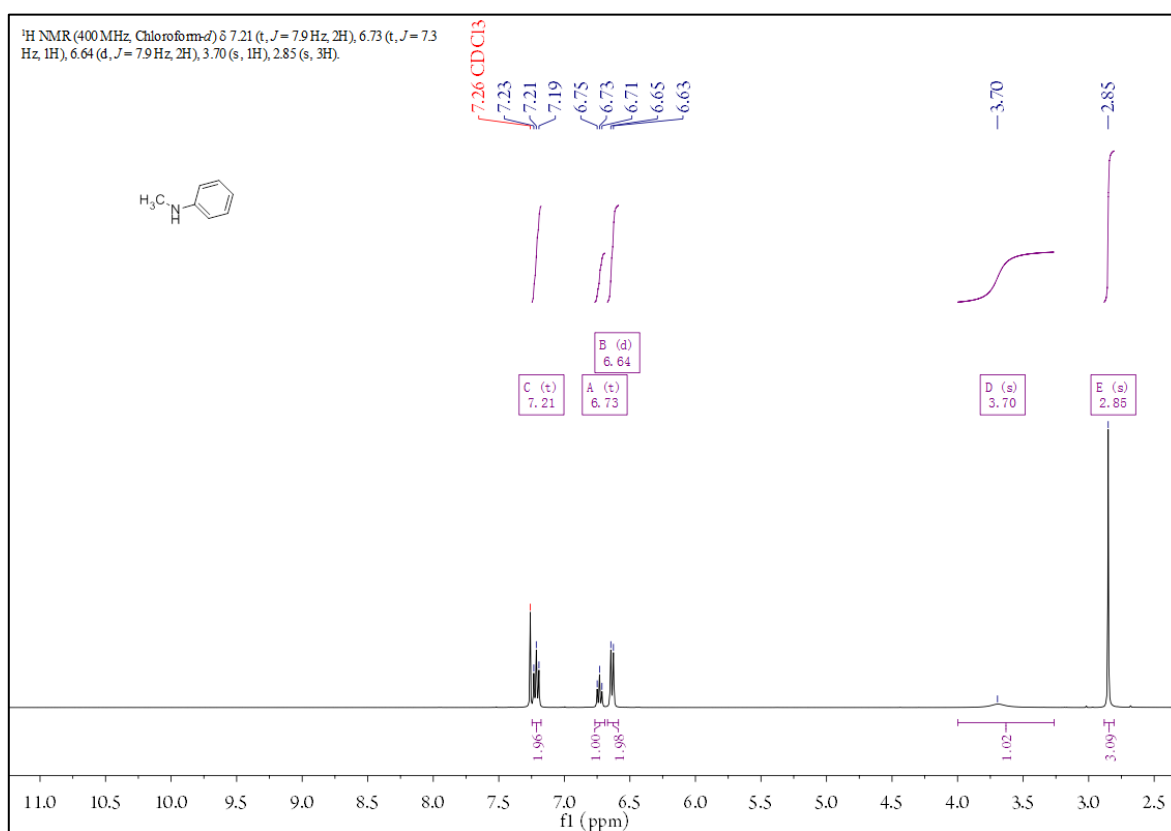

Scheme S38. <sup>1</sup>H-NMR spectrum of 4sb in CDCl<sub>3</sub>

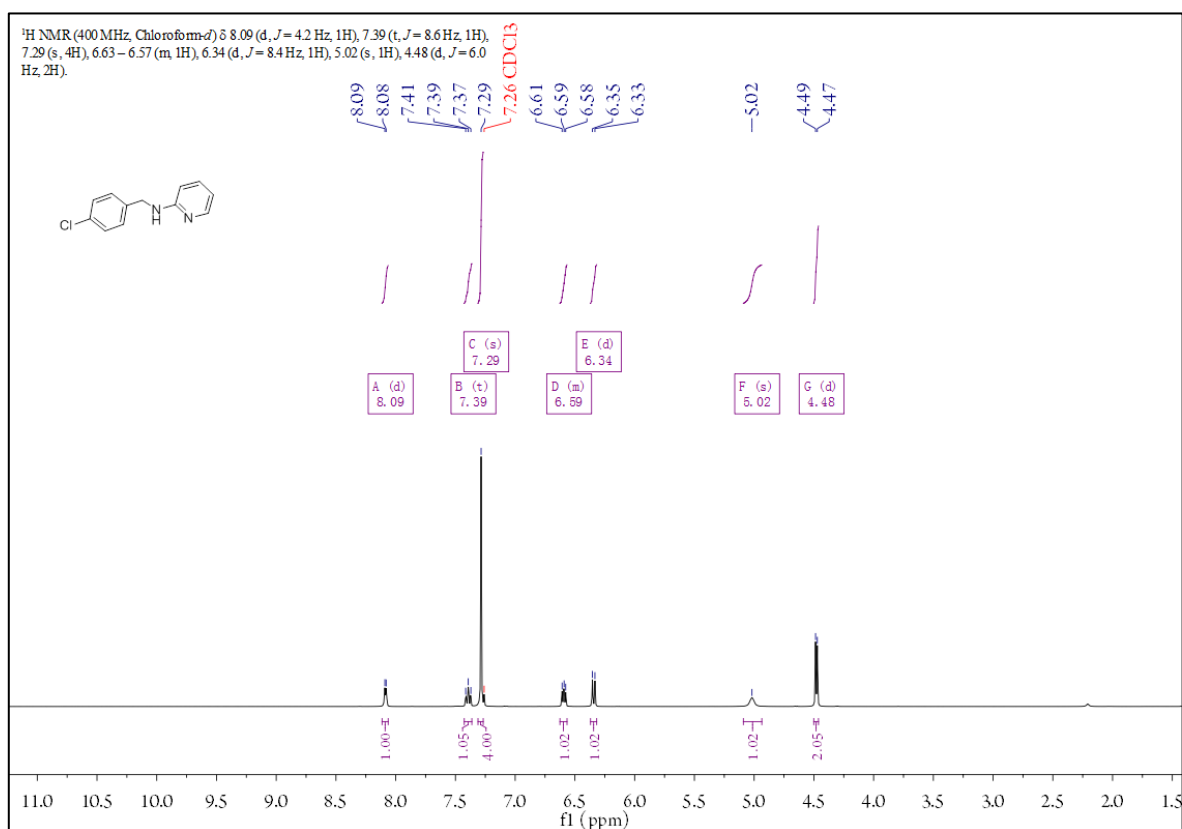

Scheme S39. <sup>1</sup>H-NMR spectrum of 4sf in CDCl<sub>3</sub>

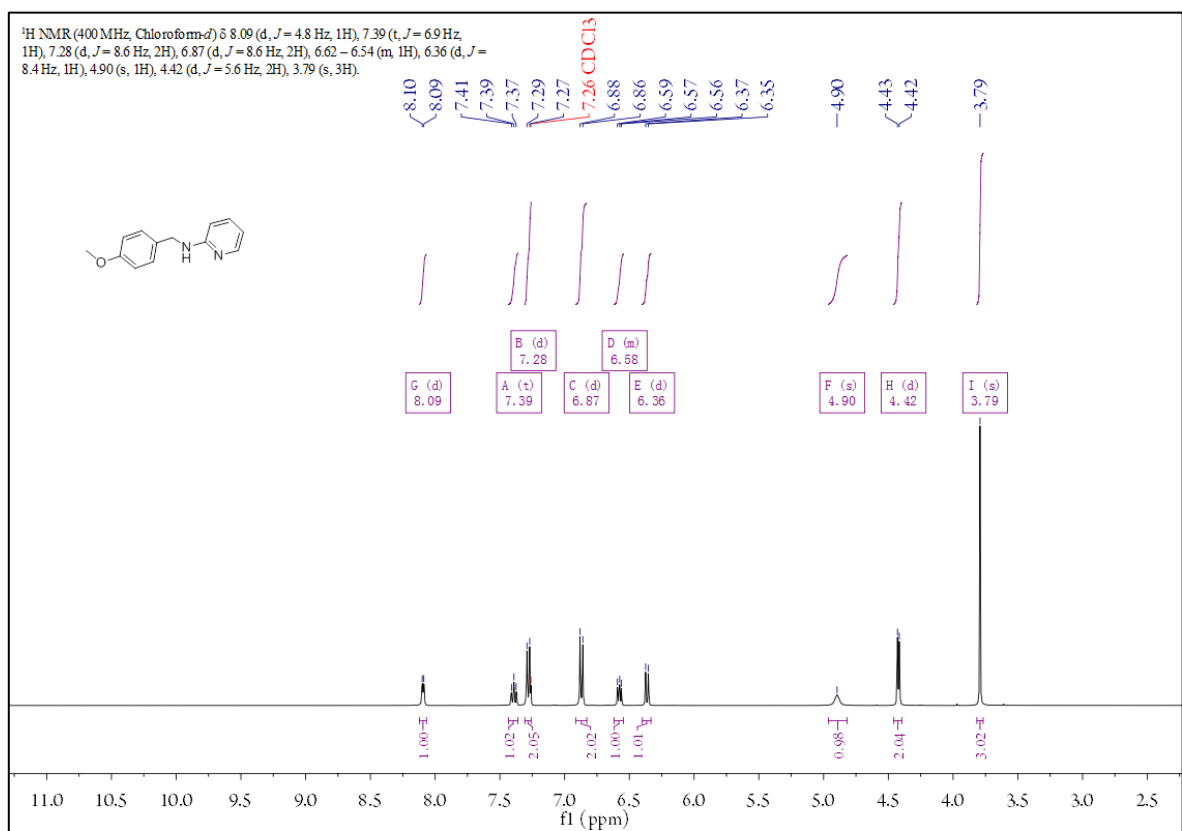



Scheme S40.  $^1\text{H-NMR}$  spectrum of 4aq in  $\text{CDCl}_3$

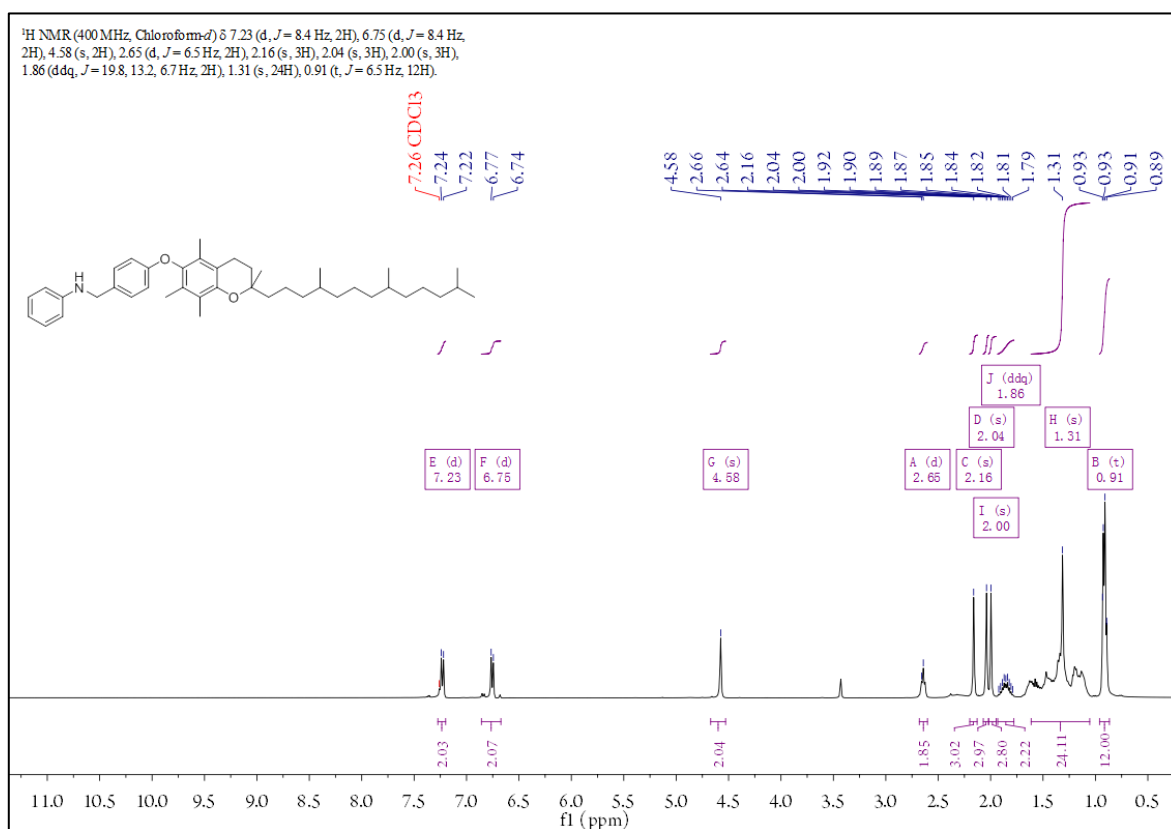

Scheme S41.  $^{13}\text{C-NMR}$  spectrum of 4aq in  $\text{CDCl}_3$

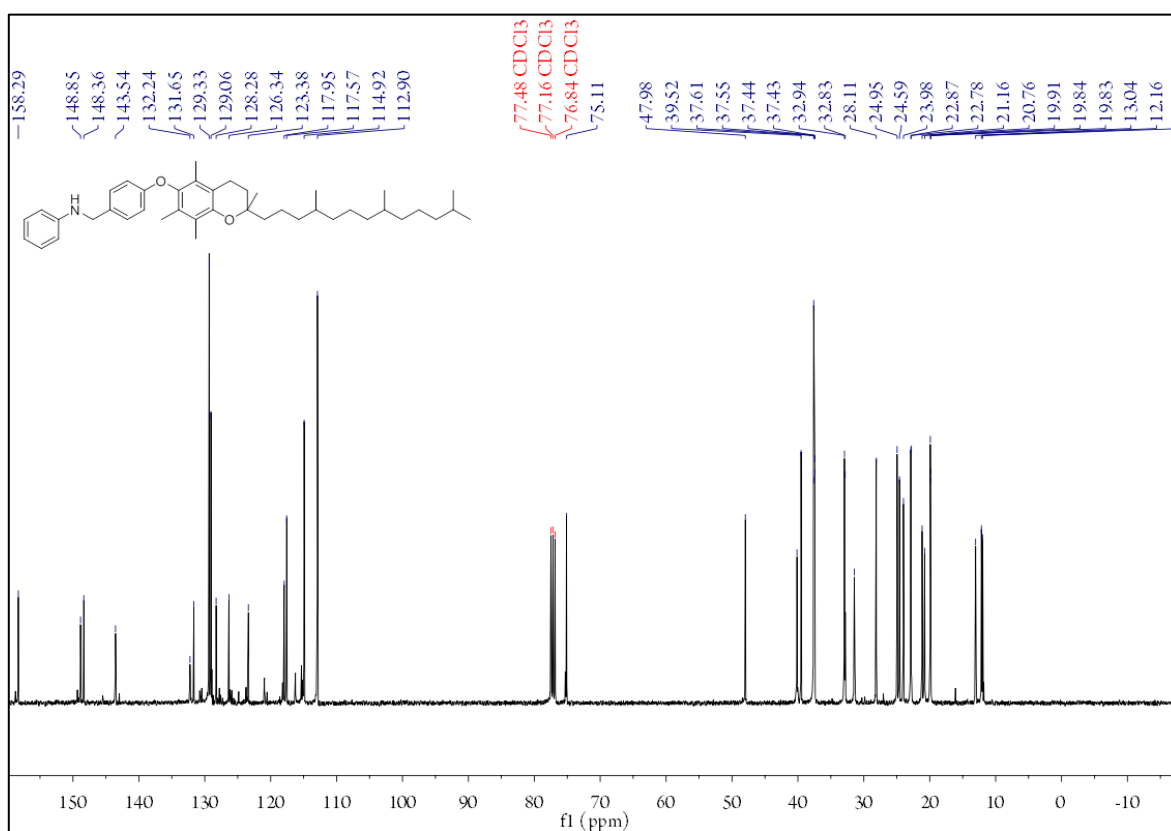

## 16. The Cartesian Coordinates (xyz) for all Optimized Structures in Gas are Presented.

### H<sub>2</sub>O

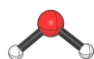

0 1

```
O 0.000000 0.000000 0.118453
H 0.000000 0.754537 -0.473811
H 0.000000 -0.754537 -0.473811
```

### THF

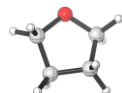

0 1

```
C -1.155432 -0.423226 -0.134866
O -0.000130 -1.245988 -0.000258
C 1.155242 -0.423506 0.135194
C 0.724845 0.986615 -0.235219
C -0.724512 0.986889 0.235067
H -1.518853 -0.463375 -1.175020
H -1.948936 -0.821307 0.508259
H 1.517915 -0.463518 1.175631
H 1.949088 -0.821919 -0.507286
H 1.341364 1.759740 0.230085
H 0.770330 1.128459 -1.321152
H -0.769912 1.129140 1.320950
H -1.340818 1.760050 -0.230459
```

### KCl

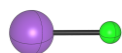

0 1

```
K 0.000000 0.000000 1.289060
Cl 0.000000 0.000000 -1.440715
```

### <sup>t</sup>BuOH

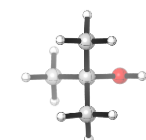

0 1

```
C 0.688636 1.255468 -0.501923
C -0.005438 -0.000005 0.016254
H 0.207909 2.151240 -0.099277
H 1.742860 1.272046 -0.201210
```

```
H 0.659894 1.309907 -1.595226
C 0.691491 -1.253703 -0.502353
C -1.474849 -0.001600 -0.368200
H 0.212943 -2.150709 -0.099855
H 0.662689 -1.307941 -1.595663
H 1.745821 -1.267871 -0.201863
H -1.594899 -0.001159 -1.455328
H -1.972965 -0.886989 0.035758
H -1.975042 0.882183 0.036698
O -0.001040 -0.000219 1.448218
H 0.920072 0.000076 1.727554
```

### <sup>t</sup>BuOK

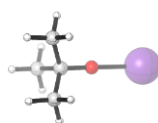

0 1

```
C -1.609565 1.190663 0.813980
C -1.063257 0.000013 -0.000053
H -1.242153 1.131410 1.845536
H -1.242698 2.130533 0.384237
H -2.707187 1.235994 0.845391
C -1.611725 0.109208 -1.437375
C -1.609590 -1.299942 0.624790
H -1.245569 -0.732967 -2.036780
H -2.709436 0.113443 -1.490632
H -1.245333 1.032159 -1.902721
H -2.707202 -1.349615 0.648955
H -1.242611 -2.163990 0.057906
H -1.242169 -1.397309 1.653457
O 0.297403 0.000036 -0.001376
K 2.556313 0.000021 -0.000126
```

### 1a

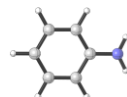

0 1

```
N -2.327692 -0.000110 -0.078997
C -0.937884 0.000018 -0.008177
C -0.221064 1.205447 -0.003925
C -0.221121 -1.205416 -0.004069
C 1.167925 1.199324 0.003009
H -0.764696 2.148144 -0.010950
```

|   |           |           |           |
|---|-----------|-----------|-----------|
| C | 1.167889  | -1.199340 | 0.003050  |
| H | -0.764751 | -2.148109 | -0.011377 |
| C | 1.876395  | -0.000029 | 0.007159  |
| H | 1.701748  | 2.146399  | 0.008206  |
| H | 1.701602  | -2.146475 | 0.008198  |
| H | 2.961888  | -0.000001 | 0.014647  |
| H | -2.767398 | -0.832480 | 0.282163  |
| H | -2.767389 | 0.833262  | 0.279813  |

**2a**

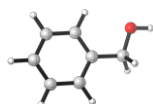

0 1

|   |           |           |           |
|---|-----------|-----------|-----------|
| C | -1.897533 | -0.627309 | 0.000040  |
| C | -0.437222 | -0.274998 | 0.000015  |
| C | 0.516528  | -1.296762 | -0.000007 |
| C | -0.009093 | 1.051968  | 0.000024  |
| C | 1.874125  | -0.998896 | -0.000017 |
| H | 0.189742  | -2.335779 | -0.000017 |
| C | 1.352163  | 1.350222  | 0.000010  |
| H | -0.751183 | 1.842866  | 0.000039  |
| C | 2.297195  | 0.329245  | -0.000010 |
| H | 2.603809  | -1.804207 | -0.000035 |
| H | 1.674435  | 2.388238  | 0.000015  |
| H | 3.358012  | 0.563938  | -0.000021 |
| H | -2.115618 | -1.256588 | -0.881544 |
| O | -2.677515 | 0.546718  | -0.000063 |
| H | -2.115626 | -1.256433 | 0.881733  |
| H | -3.600428 | 0.283396  | 0.000007  |

**2a'**

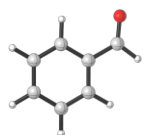

0 1

|   |           |           |           |
|---|-----------|-----------|-----------|
| C | 1.981938  | -0.467203 | 0.000166  |
| C | 0.533057  | -0.212813 | 0.000194  |
| C | -0.358972 | -1.288635 | 0.000050  |
| C | 0.045901  | 1.100015  | 0.000087  |
| C | -1.730008 | -1.058807 | -0.000071 |
| H | 0.034282  | -2.304208 | 0.000199  |
| C | -1.321854 | 1.328710  | 0.000077  |
| H | 0.764742  | 1.915184  | 0.000229  |
| C | -2.208784 | 0.249642  | -0.000113 |
| H | -2.425094 | -1.893450 | -0.000265 |

|   |           |           |           |
|---|-----------|-----------|-----------|
| H | -1.705808 | 2.344966  | 0.000125  |
| H | -3.280201 | 0.431618  | -0.000446 |
| H | 2.253370  | -1.552726 | 0.000049  |
| O | 2.838880  | 0.394145  | -0.000278 |

**3aa**

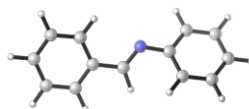

0 1

|   |           |           |           |
|---|-----------|-----------|-----------|
| C | 0.399456  | 0.397570  | -0.167138 |
| H | 0.089158  | 1.409129  | -0.486937 |
| N | -0.455592 | -0.522252 | 0.094959  |
| C | 1.836974  | 0.179254  | -0.081873 |
| C | 2.712486  | 1.224180  | -0.404443 |
| C | 2.366454  | -1.057407 | 0.318500  |
| C | 4.088644  | 1.042435  | -0.329483 |
| H | 2.301083  | 2.182853  | -0.715176 |
| C | 3.739140  | -1.237053 | 0.390869  |
| H | 1.674471  | -1.857471 | 0.564712  |
| C | 4.603997  | -0.188731 | 0.068277  |
| H | 4.759339  | 1.858913  | -0.581188 |
| H | 4.143951  | -2.196477 | 0.700777  |
| H | 5.679097  | -0.333850 | 0.127557  |
| C | -1.820197 | -0.224896 | 0.056727  |
| C | -2.351945 | 1.010847  | 0.459649  |
| C | -2.697972 | -1.236583 | -0.358997 |
| C | -3.723633 | 1.230637  | 0.420433  |
| H | -1.684032 | 1.780383  | 0.838708  |
| C | -4.065387 | -1.003116 | -0.414962 |
| H | -2.276876 | -2.194990 | -0.648181 |
| C | -4.585434 | 0.230700  | -0.025532 |
| H | -4.123715 | 2.186254  | 0.748886  |
| H | -4.731868 | -1.791767 | -0.753279 |
| H | -5.656965 | 0.405752  | -0.052758 |

**4aa**

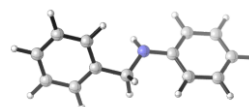

0 1

|   |           |           |           |
|---|-----------|-----------|-----------|
| C | -0.443488 | -0.768071 | 0.166428  |
| H | -0.252895 | -1.600599 | -0.535304 |
| N | 0.446340  | 0.353141  | -0.049121 |
| C | -1.883503 | -0.346448 | 0.079658  |
| C | -2.819541 | -1.148845 | -0.575378 |
| C | -2.313538 | 0.845773  | 0.671294  |

|   |           |           |           |
|---|-----------|-----------|-----------|
| C | -4.159564 | -0.775794 | -0.633175 |
| H | -2.490570 | -2.072943 | -1.046837 |
| C | -3.651000 | 1.223294  | 0.608910  |
| H | -1.585460 | 1.473309  | 1.179722  |
| C | -4.578685 | 0.412747  | -0.041926 |
| H | -4.875196 | -1.410592 | -1.148368 |
| H | -3.971423 | 2.152426  | 1.072458  |
| H | -5.622919 | 0.708300  | -0.090685 |
| C | 1.823909  | 0.175531  | -0.051826 |
| C | 2.429725  | -0.983745 | 0.456512  |
| C | 2.649157  | 1.201630  | -0.543915 |
| C | 3.817173  | -1.094744 | 0.484070  |
| H | 1.819227  | -1.800843 | 0.828040  |
| C | 4.029215  | 1.073783  | -0.518035 |
| H | 2.189605  | 2.104537  | -0.941240 |
| C | 4.628946  | -0.074745 | -0.000383 |
| H | 4.264393  | -2.001211 | 0.884012  |
| H | 4.643916  | 1.881646  | -0.906492 |
| H | 5.709837  | -0.171942 | 0.019394  |
| H | -0.240144 | -1.173120 | 1.169159  |
| H | 0.114410  | 0.996843  | -0.753422 |

**FeCl<sub>3</sub>THF<sub>2</sub>**

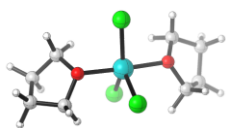

0 2

|    |           |           |           |
|----|-----------|-----------|-----------|
| Fe | 0.004032  | 0.347005  | 0.015418  |
| Cl | 0.034921  | 1.335859  | -1.912901 |
| Cl | 0.008148  | -1.837495 | -0.349373 |
| O  | 2.011314  | 0.353972  | 0.108273  |
| C  | 2.541245  | -0.330484 | 1.287109  |
| C  | 3.557389  | -1.314760 | 0.751025  |
| C  | 4.057272  | -0.613954 | -0.507051 |
| C  | 2.780149  | -0.035612 | -1.071599 |
| H  | 1.703534  | -0.796973 | 1.813551  |
| H  | 2.973925  | 0.443985  | 1.928589  |
| H  | 4.345762  | -1.530935 | 1.475371  |
| H  | 3.061598  | -2.255143 | 0.487691  |
| H  | 4.546818  | -1.288289 | -1.212850 |
| H  | 4.764333  | 0.183042  | -0.252073 |
| H  | 2.895056  | 0.863398  | -1.677626 |
| H  | 2.198266  | -0.777931 | -1.629791 |
| Cl | -0.024388 | 1.717385  | 1.730961  |
| O  | -2.013061 | 0.352154  | 0.006411  |
| C  | -2.712787 | -0.190920 | -1.162403 |
| C  | -2.622152 | -0.171620 | 1.223889  |

|   |           |           |           |
|---|-----------|-----------|-----------|
| C | -3.664230 | -1.227020 | -0.606797 |
| H | -1.964485 | -0.587106 | -1.849852 |
| H | -3.221908 | 0.656405  | -1.632986 |
| C | -3.974598 | -0.680822 | 0.781745  |
| H | -2.632298 | 0.645995  | 1.945343  |
| H | -1.987093 | -0.983959 | 1.603470  |
| H | -4.549300 | -1.352943 | -1.234401 |
| H | -3.156206 | -2.194301 | -0.528948 |
| H | -4.373407 | -1.432058 | 1.466808  |
| H | -4.694286 | 0.143023  | 0.723851  |

**Fe<sub>4</sub>Cl<sub>8</sub>THF<sub>6</sub>**

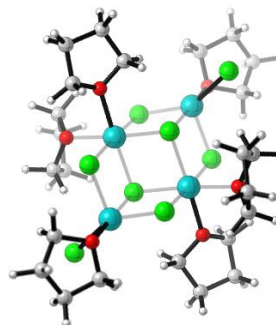

0 1

|    |           |           |           |
|----|-----------|-----------|-----------|
| Fe | -2.926168 | 0.218014  | 0.044885  |
| Fe | -0.147940 | -1.746351 | -0.022523 |
| Cl | -1.893582 | 1.914078  | -1.148513 |
| Cl | -2.087148 | -1.484282 | -1.332191 |
| Cl | -0.929650 | 0.054497  | 1.323625  |
| Cl | -4.185680 | 0.837810  | 1.843541  |
| O  | -1.121334 | -3.134851 | 1.111060  |
| C  | -0.373136 | -4.048953 | 1.937358  |
| H  | 0.083732  | -3.488186 | 2.765181  |
| H  | 0.419558  | -4.462361 | 1.311558  |
| C  | -1.433991 | -5.026863 | 2.405151  |
| H  | -1.162980 | -5.506848 | 3.348139  |
| H  | -1.568738 | -5.816356 | 1.659663  |
| C  | -2.705578 | -4.161763 | 2.514338  |
| H  | -3.547507 | -4.634146 | 2.003040  |
| H  | -3.006650 | -4.001515 | 3.552169  |
| C  | -2.322620 | -2.835835 | 1.856668  |
| H  | -3.047969 | -2.445549 | 1.136531  |
| H  | -2.101620 | -2.051624 | 2.591657  |
| O  | 0.464576  | -3.421201 | -1.059561 |
| C  | -0.519332 | -4.255031 | -1.715709 |
| H  | -1.473898 | -4.074463 | -1.219851 |
| H  | -0.214637 | -5.297947 | -1.547375 |
| C  | -0.476300 | -3.877785 | -3.198797 |
| H  | -1.370913 | -3.322413 | -3.489098 |
| H  | -0.420953 | -4.774849 | -3.822503 |

|    |           |           |           |
|----|-----------|-----------|-----------|
| C  | 0.786963  | -3.007598 | -3.328360 |
| H  | 1.390557  | -3.251035 | -4.205645 |
| H  | 0.519287  | -1.947976 | -3.386596 |
| C  | 1.526213  | -3.267950 | -2.032923 |
| H  | 2.088304  | -4.212757 | -2.056739 |
| H  | 2.186103  | -2.470712 | -1.688065 |
| O  | -4.570271 | 0.293370  | -1.140483 |
| C  | -5.585783 | -0.688051 | -0.797572 |
| H  | -5.223121 | -1.256992 | 0.065968  |
| H  | -5.686463 | -1.363281 | -1.656058 |
| C  | -6.839841 | 0.110688  | -0.514053 |
| H  | -6.835081 | 0.435250  | 0.531577  |
| H  | -7.751826 | -0.460706 | -0.703227 |
| C  | -6.668972 | 1.312571  | -1.437108 |
| H  | -6.921179 | 1.047475  | -2.470332 |
| H  | -7.283143 | 2.168348  | -1.147999 |
| C  | -5.189961 | 1.601881  | -1.301328 |
| H  | -4.721909 | 2.065986  | -2.171878 |
| H  | -4.963830 | 2.191461  | -0.404919 |
| Fe | 2.925924  | -0.218156 | -0.044922 |
| Fe | 0.147773  | 1.746272  | 0.022755  |
| Cl | 1.893289  | -1.913896 | 1.148994  |
| Cl | 2.087061  | 1.484033  | 1.332276  |
| Cl | 0.929269  | -0.054596 | -1.323410 |
| Cl | 4.185418  | -0.836316 | -1.844142 |
| O  | 1.121294  | 3.134512  | -1.110986 |
| C  | 0.373214  | 4.048627  | -1.937381 |
| H  | -0.083824 | 3.487766  | -2.765041 |
| H  | -0.419359 | 4.462299  | -1.311602 |
| C  | 1.434168  | 5.026319  | -2.405545 |
| H  | 1.163441  | 5.505340  | -3.349106 |
| H  | 1.568427  | 5.816591  | -1.660801 |
| C  | 2.706053  | 4.161416  | -2.513385 |
| H  | 3.547126  | 4.633686  | -2.000566 |
| H  | 3.008734  | 4.001682  | -3.550823 |
| C  | 2.322369  | 2.835224  | -1.856793 |
| H  | 3.047498  | 2.443882  | -1.137008 |
| H  | 2.100828  | 2.051714  | -2.592379 |
| O  | -0.464306 | 3.421275  | 1.059764  |
| C  | 0.519886  | 4.255107  | 1.715498  |
| H  | 1.474280  | 4.074373  | 1.219367  |
| H  | 0.215244  | 5.298025  | 1.547094  |
| C  | 0.477267  | 3.878105  | 3.198669  |
| H  | 1.372056  | 3.322979  | 3.488901  |
| H  | 0.421853  | 4.775274  | 3.822220  |
| C  | -0.785800 | 3.007709  | 3.328662  |
| H  | -1.389072 | 3.250970  | 4.206217  |

|   |           |           |           |
|---|-----------|-----------|-----------|
| H | -0.517923 | 1.948122  | 3.386680  |
| C | -1.525578 | 3.268082  | 2.033538  |
| H | -2.087604 | 4.212922  | 2.057585  |
| H | -2.185661 | 2.470898  | 1.688931  |
| O | 4.570135  | -0.293770 | 1.140272  |
| C | 5.585465  | 0.688044  | 0.797960  |
| H | 5.222598  | 1.257572  | -0.065102 |
| H | 5.686158  | 1.362661  | 1.656926  |
| C | 6.839594  | -0.110324 | 0.513727  |
| H | 6.834720  | -0.434210 | -0.532112 |
| H | 7.751527  | 0.461077  | 0.703131  |
| C | 6.669045  | -1.312832 | 1.436033  |
| H | 6.921380  | -1.048366 | 2.469387  |
| H | 7.283294  | -2.168334 | 1.146280  |
| C | 5.190053  | -1.602272 | 1.300304  |
| H | 4.722196  | -2.066952 | 2.170652  |
| H | 4.963892  | -2.191386 | 0.403593  |

**Cr0-ncp-2**

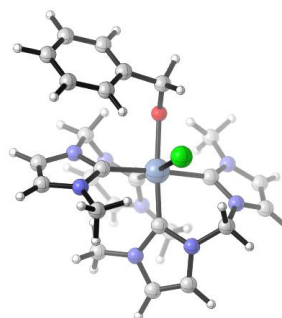

-2 1

|   |           |           |           |
|---|-----------|-----------|-----------|
| N | 2.783850  | 0.734825  | -1.642293 |
| N | 1.956810  | 2.308044  | -0.396747 |
| N | 3.025291  | -1.553575 | -1.042228 |
| N | 2.327478  | -2.532849 | 0.739072  |
| N | -0.518758 | 0.446126  | 2.483509  |
| N | 1.648961  | 0.609456  | 2.374789  |
| N | -2.008473 | 1.270959  | 0.814326  |
| N | -1.496884 | 2.126534  | -1.090609 |
| C | 1.650556  | 0.989140  | -0.824111 |
| C | 3.193141  | 2.743239  | -0.852536 |
| H | 3.573232  | 3.728003  | -0.622294 |
| C | 3.724230  | 1.748139  | -1.600256 |
| H | 4.653762  | 1.696453  | -2.152986 |
| C | 3.002267  | -0.600233 | -2.130694 |
| H | 2.155866  | -0.868227 | -2.778199 |
| H | 3.954084  | -0.640441 | -2.671199 |
| C | 1.906322  | -1.625240 | -0.220989 |
| C | 4.100451  | -2.269429 | -0.547089 |
| H | 5.050704  | -2.324797 | -1.061291 |

|    |           |           |           |
|----|-----------|-----------|-----------|
| C  | 3.650840  | -2.902091 | 0.567812  |
| H  | 4.144157  | -3.601891 | 1.226410  |
| C  | 1.497896  | -2.901875 | 1.862940  |
| H  | 0.458309  | -2.687316 | 1.578723  |
| H  | 1.760527  | -2.322160 | 2.758450  |
| H  | 1.626442  | -3.968796 | 2.082898  |
| C  | 1.130209  | 3.111617  | 0.457800  |
| H  | 1.734571  | 3.595175  | 1.237854  |
| H  | 0.391735  | 2.467423  | 0.937341  |
| H  | 0.591633  | 3.896656  | -0.099138 |
| C  | 0.553042  | 0.167049  | 1.587125  |
| C  | 1.243512  | 1.218187  | 3.553093  |
| H  | 1.953471  | 1.616344  | 4.263684  |
| C  | -0.107291 | 1.151487  | 3.603555  |
| H  | -0.801071 | 1.466418  | 4.372407  |
| C  | -1.865652 | 0.406614  | 1.970212  |
| H  | -2.060003 | -0.617356 | 1.636998  |
| H  | -2.568386 | 0.723621  | 2.747821  |
| C  | -1.181845 | 1.046030  | -0.281465 |
| C  | -2.699045 | 2.462266  | 0.727301  |
| H  | -3.408451 | 2.778291  | 1.480786  |
| C  | -2.387881 | 2.996157  | -0.482072 |
| H  | -2.754535 | 3.883077  | -0.977804 |
| C  | 3.025065  | 0.533442  | 1.978005  |
| H  | 3.061498  | 0.134948  | 0.963253  |
| H  | 3.603038  | -0.130602 | 2.638750  |
| H  | 3.502633  | 1.524721  | 1.975932  |
| C  | -0.838953 | 2.381542  | -2.348621 |
| H  | -1.568606 | 2.740593  | -3.083798 |
| H  | -0.399625 | 1.438440  | -2.691870 |
| H  | -0.044105 | 3.135652  | -2.240239 |
| Cl | -0.218823 | -0.998875 | -2.848795 |
| O  | -0.960557 | -1.890555 | 0.383665  |
| C  | -1.873472 | -2.593802 | -0.365796 |
| H  | -2.060318 | -3.604173 | 0.077545  |
| H  | -1.537456 | -2.758804 | -1.408362 |
| C  | -3.200080 | -1.864061 | -0.397424 |
| C  | -4.183457 | -2.102021 | 0.569048  |
| C  | -3.422015 | -0.836239 | -1.327729 |
| C  | -5.346717 | -1.336375 | 0.628269  |
| H  | -4.015352 | -2.898847 | 1.296321  |
| C  | -4.579137 | -0.065226 | -1.268566 |
| H  | -2.650002 | -0.649573 | -2.075663 |
| C  | -5.544533 | -0.302808 | -0.288127 |
| H  | -6.098554 | -1.541021 | 1.392112  |
| H  | -4.723681 | 0.741982  | -1.987067 |
| H  | -6.444880 | 0.309769  | -0.240695 |

Cr 0.317132 -0.348247 -0.263056

### Cr0-ncp-3

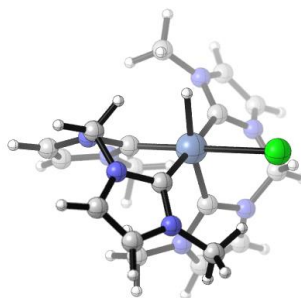

-2 1

|   |           |           |           |
|---|-----------|-----------|-----------|
| N | 1.504607  | 2.320496  | -0.325905 |
| N | -0.156281 | 2.225391  | 1.079791  |
| N | 2.967312  | 0.539467  | -0.922751 |
| N | 2.862487  | -1.508141 | -0.268189 |
| N | -1.596285 | -1.790628 | 1.132056  |
| N | 0.110528  | -0.949670 | 2.176943  |
| N | -2.946000 | -0.656226 | -0.475791 |
| N | -2.658988 | 1.328591  | -1.256764 |
| C | 0.387407  | 1.496826  | -0.023833 |
| C | 0.670432  | 3.265094  | 1.476021  |
| H | 0.412119  | 3.917939  | 2.300451  |
| C | 1.720421  | 3.309266  | 0.622154  |
| H | 2.548494  | 4.000932  | 0.561711  |
| C | 2.436974  | 1.829039  | -1.299094 |
| H | 1.861296  | 1.656252  | -2.224236 |
| H | 3.257143  | 2.545900  | -1.430200 |
| C | 2.050362  | -0.490003 | -0.756487 |
| C | 4.231691  | 0.213682  | -0.458999 |
| H | 5.067946  | 0.895489  | -0.508164 |
| C | 4.162154  | -1.084246 | -0.063909 |
| H | 4.931058  | -1.749716 | 0.306421  |
| C | 2.339358  | -2.788952 | 0.140251  |
| H | 1.425063  | -2.976705 | -0.436927 |
| H | 2.098882  | -2.799612 | 1.212888  |
| H | 3.080911  | -3.570229 | -0.064419 |
| C | -1.312702 | 1.831715  | 1.827315  |
| H | -1.066364 | 1.587426  | 2.875274  |
| H | -1.731116 | 0.938458  | 1.359690  |
| H | -2.079897 | 2.621532  | 1.830923  |
| C | -0.402678 | -1.083327 | 0.855015  |
| C | -0.784631 | -1.392800 | 3.137507  |
| H | -0.553323 | -1.361336 | 4.194981  |
| C | -1.863844 | -1.891101 | 2.489666  |
| H | -2.750755 | -2.377665 | 2.870777  |
| C | -2.559589 | -1.941466 | 0.069447  |

|    |           |           |           |
|----|-----------|-----------|-----------|
| H  | -2.078964 | -2.511351 | -0.737583 |
| H  | -3.449960 | -2.451732 | 0.455574  |
| C  | -1.941532 | 0.170664  | -0.964246 |
| C  | -4.171319 | -0.016726 | -0.382673 |
| H  | -5.063324 | -0.511148 | -0.026643 |
| C  | -3.988712 | 1.229255  | -0.890947 |
| H  | -4.692421 | 2.034762  | -1.054797 |
| C  | 1.307779  | -0.233896 | 2.508718  |
| H  | 1.736370  | 0.147072  | 1.578931  |
| H  | 2.045175  | -0.881151 | 3.008490  |
| H  | 1.099431  | 0.624407  | 3.168627  |
| C  | -2.031345 | 2.496394  | -1.814125 |
| H  | -2.722730 | 2.997663  | -2.503093 |
| H  | -1.131899 | 2.145939  | -2.337421 |
| H  | -1.720624 | 3.208060  | -1.037129 |
| H  | 0.128843  | 0.463048  | -2.468941 |
| Cl | -0.219743 | -2.585245 | -2.168260 |
| Cr | 0.040469  | -0.196939 | -0.868383 |

**CrO-ncp-IM3-o**

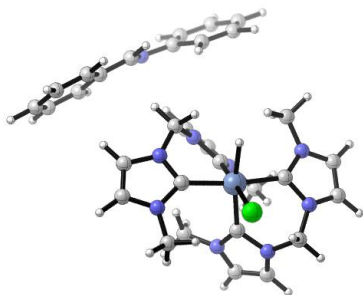

-2 1

|   |           |           |           |
|---|-----------|-----------|-----------|
| N | -4.448049 | -0.225864 | 0.934969  |
| N | -2.828593 | -1.058128 | 2.120297  |
| N | -4.250149 | 1.615221  | -0.585078 |
| N | -2.446933 | 2.677554  | -1.111475 |
| N | 0.758925  | 0.201578  | 0.092584  |
| N | -0.578468 | 1.312036  | 1.369225  |
| N | 0.560674  | -2.002771 | -0.740227 |
| N | -1.033346 | -3.399094 | -0.416299 |
| C | -3.125491 | -0.710210 | 0.783316  |
| C | -3.828609 | -0.671690 | 2.999895  |
| H | -3.761014 | -0.861171 | 4.062549  |
| C | -4.826146 | -0.123769 | 2.266946  |
| H | -5.800651 | 0.240559  | 2.563762  |
| C | -5.053864 | 0.484496  | -0.167116 |
| H | -5.111222 | -0.210224 | -1.016243 |
| H | -6.045866 | 0.839822  | 0.133149  |
| C | -2.926021 | 1.382063  | -0.954474 |
| C | -4.525870 | 2.964218  | -0.424251 |

|    |           |           |           |
|----|-----------|-----------|-----------|
| H  | -5.505991 | 3.330516  | -0.151724 |
| C  | -3.395244 | 3.628051  | -0.776510 |
| H  | -3.194022 | 4.687459  | -0.849404 |
| C  | -1.087226 | 2.965607  | -1.500978 |
| H  | -0.721058 | 2.084403  | -2.041071 |
| H  | -0.431892 | 3.133928  | -0.636436 |
| H  | -1.066647 | 3.854223  | -2.142634 |
| C  | -1.541074 | -1.525355 | 2.558236  |
| H  | -0.921651 | -1.682040 | 1.673098  |
| H  | -1.628442 | -2.469304 | 3.114508  |
| H  | -1.033960 | -0.787692 | 3.197488  |
| C  | -0.605012 | 0.459210  | 0.258041  |
| C  | 0.716129  | 1.492952  | 1.856033  |
| H  | 0.926158  | 2.151999  | 2.685319  |
| C  | 1.554388  | 0.786826  | 1.063175  |
| H  | 2.634321  | 0.692691  | 1.070211  |
| C  | 1.186470  | -0.712008 | -0.932027 |
| H  | 0.819714  | -0.325990 | -1.895742 |
| H  | 2.276936  | -0.807417 | -0.901147 |
| C  | -0.816149 | -2.074786 | -0.732046 |
| C  | 1.167989  | -3.190209 | -0.376577 |
| H  | 2.245276  | -3.298293 | -0.337097 |
| C  | 0.157473  | -4.075110 | -0.177040 |
| H  | 0.179943  | -5.126571 | 0.070269  |
| C  | -1.723388 | 1.895255  | 2.005124  |
| H  | -1.820279 | 1.560015  | 3.050417  |
| H  | -2.620211 | 1.590257  | 1.465709  |
| H  | -1.665469 | 2.993482  | 2.000285  |
| C  | -2.352227 | -3.932558 | -0.178804 |
| H  | -2.393594 | -4.977518 | -0.506314 |
| H  | -3.068132 | -3.330088 | -0.750397 |
| H  | -2.613642 | -3.885448 | 0.888534  |
| Cl | -3.801141 | -1.645277 | -2.391651 |
| C  | 4.642099  | 0.074406  | -0.573936 |
| H  | -1.228797 | 0.045370  | -2.305499 |
| N  | 4.849190  | 1.056625  | 0.318279  |
| H  | 4.350730  | 0.297536  | -1.613784 |
| C  | 4.845011  | -1.293327 | -0.269874 |
| C  | 5.191633  | -1.745156 | 1.043833  |
| C  | 4.700633  | -2.309158 | -1.263620 |
| C  | 5.387549  | -3.085269 | 1.314205  |
| H  | 5.294765  | -0.990492 | 1.819503  |
| C  | 4.901321  | -3.647061 | -0.976600 |
| H  | 4.418243  | -2.006419 | -2.273453 |
| C  | 5.254939  | -4.068116 | 0.317922  |
| H  | 5.647814  | -3.387252 | 2.330408  |
| H  | 4.774536  | -4.384909 | -1.769726 |

|    |           |           |           |
|----|-----------|-----------|-----------|
| H  | 5.403043  | -5.121462 | 0.543880  |
| C  | 4.460552  | 2.327911  | 0.029718  |
| C  | 3.546274  | 2.717465  | -0.999417 |
| C  | 4.962284  | 3.384411  | 0.842934  |
| C  | 3.198634  | 4.045404  | -1.192428 |
| H  | 3.067162  | 1.949085  | -1.602741 |
| C  | 4.616836  | 4.706442  | 0.630364  |
| H  | 5.645009  | 3.105722  | 1.644547  |
| C  | 3.732448  | 5.066630  | -0.398746 |
| H  | 2.478058  | 4.292257  | -1.973841 |
| H  | 5.037349  | 5.478358  | 1.277178  |
| H  | 3.453535  | 6.105587  | -0.560864 |
| Cr | -1.999227 | -0.389864 | -0.830514 |

### CrO-ncp-TS2-o

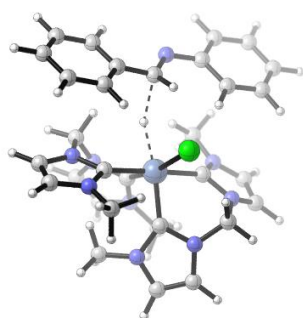

-2 1

|   |           |           |           |
|---|-----------|-----------|-----------|
| N | -0.457370 | -3.309884 | -1.442161 |
| N | 1.230291  | -3.514133 | -0.078963 |
| N | -2.430492 | -2.021620 | -1.004062 |
| N | -2.789241 | -0.770274 | 0.713377  |
| N | 1.240358  | -0.071058 | 2.378241  |
| N | -0.050886 | -1.814392 | 2.489591  |
| N | 2.816142  | 0.430838  | 0.675024  |
| N | 3.210702  | -0.565484 | -1.185661 |
| C | 0.419172  | -2.498013 | -0.667919 |
| C | 0.743933  | -4.787279 | -0.333705 |
| H | 1.234722  | -5.674328 | 0.047109  |
| C | -0.321767 | -4.661581 | -1.159321 |
| H | -0.928723 | -5.415889 | -1.642255 |
| C | -1.630487 | -2.685220 | -2.008845 |
| H | -1.289397 | -1.913870 | -2.710262 |
| H | -2.237268 | -3.447504 | -2.513228 |
| C | -1.809035 | -1.034639 | -0.240668 |
| C | -3.655865 | -2.411971 | -0.480456 |
| H | -4.281447 | -3.159684 | -0.947143 |
| C | -3.888437 | -1.592057 | 0.577950  |
| H | -4.760849 | -1.489190 | 1.209569  |
| C | -2.645280 | 0.251774  | 1.720402  |
| H | -1.752748 | 0.832144  | 1.467935  |

|    |           |           |           |
|----|-----------|-----------|-----------|
| H  | -2.509903 | -0.189371 | 2.718319  |
| H  | -3.517699 | 0.916148  | 1.716987  |
| C  | 2.257103  | -3.264648 | 0.890363  |
| H  | 2.407553  | -2.185948 | 0.955198  |
| H  | 3.204704  | -3.742682 | 0.598630  |
| H  | 1.980687  | -3.627946 | 1.895522  |
| C  | 0.369179  | -0.821630 | 1.545247  |
| C  | 0.617123  | -1.710643 | 3.700489  |
| H  | 0.408815  | -2.375944 | 4.528785  |
| C  | 1.436627  | -0.635685 | 3.625132  |
| H  | 2.078082  | -0.185369 | 4.370005  |
| C  | 2.055753  | 0.953400  | 1.785364  |
| H  | 1.402546  | 1.746254  | 1.404304  |
| H  | 2.747658  | 1.352879  | 2.536226  |
| C  | 2.143335  | -0.186573 | -0.372308 |
| C  | 4.189266  | 0.393946  | 0.540602  |
| H  | 4.855551  | 0.880850  | 1.238168  |
| C  | 4.437312  | -0.233118 | -0.638159 |
| H  | 5.370390  | -0.431327 | -1.148730 |
| C  | -0.876320 | -2.946269 | 2.187090  |
| H  | -0.331888 | -3.896564 | 2.330902  |
| H  | -1.178015 | -2.883489 | 1.141035  |
| H  | -1.779819 | -2.967890 | 2.814699  |
| C  | 3.033076  | -1.370750 | -2.367449 |
| H  | 3.800001  | -1.113193 | -3.107829 |
| H  | 2.036776  | -1.160395 | -2.770614 |
| H  | 3.104793  | -2.443958 | -2.136476 |
| Cl | -0.039660 | 0.154300  | -2.905435 |
| C  | -0.296448 | 2.853274  | -0.551146 |
| H  | 0.092635  | 1.203314  | 0.065147  |
| N  | -1.260005 | 3.440926  | 0.179940  |
| H  | -0.502620 | 2.356653  | -1.505040 |
| C  | 1.065694  | 3.360775  | -0.436123 |
| C  | 1.432391  | 4.306352  | 0.544710  |
| C  | 2.074466  | 2.873423  | -1.294787 |
| C  | 2.747262  | 4.743401  | 0.656992  |
| H  | 0.645812  | 4.675862  | 1.198402  |
| C  | 3.382664  | 3.318102  | -1.181149 |
| H  | 1.795462  | 2.110178  | -2.023073 |
| C  | 3.737410  | 4.259855  | -0.203702 |
| H  | 3.007718  | 5.477107  | 1.422149  |
| H  | 4.144940  | 2.912039  | -1.845901 |
| H  | 4.767501  | 4.603266  | -0.112535 |
| C  | -2.545254 | 3.054351  | -0.046606 |
| C  | -2.964113 | 2.009333  | -0.926820 |
| C  | -3.576858 | 3.712123  | 0.680547  |
| C  | -4.302240 | 1.651062  | -1.020644 |



|    |           |           |           |
|----|-----------|-----------|-----------|
| H  | -2.223270 | 1.437871  | -1.483857 |
| C  | -4.908650 | 3.350287  | 0.565795  |
| H  | -3.269685 | 4.508962  | 1.357692  |
| C  | -5.296660 | 2.302229  | -0.283461 |
| H  | -4.571717 | 0.817506  | -1.671455 |
| H  | -5.661218 | 3.881522  | 1.152579  |
| H  | -6.341759 | 2.007624  | -0.368080 |
| Cr | 0.150554  | -0.583118 | -0.363011 |

**Mn1-ncp-2**

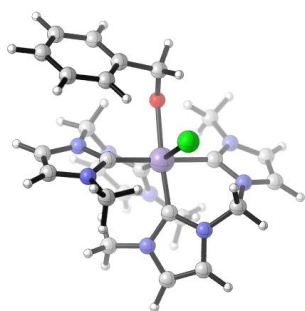

-1 1

|   |           |           |           |
|---|-----------|-----------|-----------|
| N | 2.741273  | 1.194860  | -1.402423 |
| N | 1.859807  | 2.457073  | 0.111210  |
| N | 3.017701  | -1.160669 | -1.342310 |
| N | 2.316731  | -2.576963 | 0.103759  |
| N | -0.458279 | -0.163189 | 2.527352  |
| N | 1.694964  | -0.009107 | 2.475702  |
| N | -2.007040 | 0.929336  | 1.107265  |
| N | -1.622411 | 2.193667  | -0.576752 |
| C | 1.626025  | 1.225626  | -0.543609 |
| C | 3.026703  | 3.075639  | -0.309887 |
| H | 3.343240  | 4.032817  | 0.079247  |
| C | 3.589729  | 2.275613  | -1.245651 |
| H | 4.487730  | 2.399216  | -1.834280 |
| C | 3.016005  | 0.015626  | -2.185823 |
| H | 2.220392  | -0.104525 | -2.932725 |
| H | 3.998824  | 0.119931  | -2.656997 |
| C | 1.917753  | -1.424501 | -0.546032 |
| C | 4.049595  | -2.061992 | -1.156559 |
| H | 4.974146  | -2.016152 | -1.713896 |
| C | 3.599512  | -2.961663 | -0.244180 |
| H | 4.065329  | -3.848619 | 0.160414  |
| C | 1.501082  | -3.225310 | 1.109218  |
| H | 0.456677  | -2.935986 | 0.902116  |
| H | 1.794867  | -2.905643 | 2.119375  |
| H | 1.625958  | -4.311050 | 1.034374  |
| C | 1.026420  | 3.013514  | 1.142512  |
| H | 1.640023  | 3.365861  | 1.981887  |
| H | 0.350098  | 2.237466  | 1.501110  |

|    |           |           |           |
|----|-----------|-----------|-----------|
| H  | 0.422486  | 3.856243  | 0.775012  |
| C  | 0.597798  | -0.163950 | 1.604388  |
| C  | 1.306916  | 0.108636  | 3.802015  |
| H  | 2.023788  | 0.216916  | 4.603166  |
| C  | -0.045251 | 0.032280  | 3.831392  |
| H  | -0.737410 | 0.063287  | 4.660735  |
| C  | -1.820491 | -0.157853 | 2.045720  |
| H  | -1.982577 | -1.097996 | 1.504956  |
| H  | -2.506423 | -0.028396 | 2.888960  |
| C  | -1.172921 | 1.024000  | 0.008099  |
| C  | -2.886099 | 1.986902  | 1.214909  |
| H  | -3.637684 | 2.043141  | 1.988967  |
| C  | -2.648566 | 2.783641  | 0.142330  |
| H  | -3.140954 | 3.685534  | -0.190859 |
| C  | 3.073145  | 0.021346  | 2.068060  |
| H  | 3.110938  | 0.097870  | 0.981475  |
| H  | 3.607548  | -0.890361 | 2.371718  |
| H  | 3.588632  | 0.888329  | 2.502243  |
| C  | -1.031136 | 2.775192  | -1.757815 |
| H  | -1.818873 | 3.093805  | -2.449726 |
| H  | -0.420762 | 2.005873  | -2.241472 |
| H  | -0.410691 | 3.646624  | -1.502347 |
| Cl | -0.107461 | -0.290759 | -2.913140 |
| O  | -0.900324 | -1.922445 | 0.023266  |
| C  | -1.785273 | -2.427666 | -0.899879 |
| H  | -1.983008 | -3.512315 | -0.710587 |
| H  | -1.419468 | -2.351858 | -1.942054 |
| C  | -3.119312 | -1.709806 | -0.806927 |
| C  | -4.083908 | -2.104374 | 0.127174  |
| C  | -3.367030 | -0.553965 | -1.560416 |
| C  | -5.254403 | -1.371669 | 0.318509  |
| H  | -3.898633 | -3.002969 | 0.718363  |
| C  | -4.534205 | 0.181504  | -1.373940 |
| H  | -2.606368 | -0.237300 | -2.275021 |
| C  | -5.484050 | -0.220424 | -0.433797 |
| H  | -5.993081 | -1.701862 | 1.048642  |
| H  | -4.701590 | 1.084104  | -1.961632 |
| H  | -6.394969 | 0.358178  | -0.288224 |
| Mn | 0.383351  | -0.192034 | -0.276447 |

**Mn1-ncp-3**

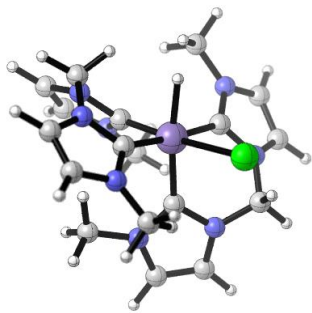

-1 1

|   |           |           |           |
|---|-----------|-----------|-----------|
| N | 1.429281  | 2.366775  | -0.060783 |
| N | -0.341298 | 2.230092  | 1.175697  |
| N | 2.930380  | 0.685066  | -0.753220 |
| N | 2.900481  | -1.426466 | -0.384619 |
| N | -1.564764 | -1.866074 | 1.081740  |
| N | 0.082501  | -1.078987 | 2.230644  |
| N | -2.844535 | -0.730009 | -0.561378 |
| N | -2.589685 | 1.251036  | -1.344163 |
| C | 0.330860  | 1.505874  | 0.154475  |
| C | 0.318334  | 3.399823  | 1.522965  |
| H | -0.060296 | 4.072231  | 2.279950  |
| C | 1.434394  | 3.479646  | 0.758458  |
| H | 2.210856  | 4.230769  | 0.719545  |
| C | 2.403795  | 1.993750  | -1.043122 |
| H | 1.882134  | 1.915607  | -2.014217 |
| H | 3.217839  | 2.727035  | -1.058704 |
| C | 2.033890  | -0.369317 | -0.635642 |
| C | 4.248028  | 0.310167  | -0.572350 |
| H | 5.072456  | 1.005854  | -0.635105 |
| C | 4.224940  | -1.029103 | -0.349719 |
| H | 5.032113  | -1.726243 | -0.176143 |
| C | 2.453622  | -2.773039 | -0.123185 |
| H | 1.389732  | -2.724842 | 0.121691  |
| H | 3.033378  | -3.200330 | 0.705876  |
| H | 2.544741  | -3.405157 | -1.010895 |
| C | -1.580516 | 1.825960  | 1.775694  |
| H | -1.515384 | 1.851445  | 2.872443  |
| H | -1.794552 | 0.804740  | 1.456444  |
| H | -2.419039 | 2.467434  | 1.463885  |
| C | -0.398179 | -1.105115 | 0.903228  |
| C | -0.771761 | -1.708146 | 3.122440  |
| H | -0.552412 | -1.783631 | 4.178250  |
| C | -1.816704 | -2.186507 | 2.403909  |
| H | -2.678729 | -2.762937 | 2.709424  |
| C | -2.472103 | -2.023190 | -0.029850 |
| H | -1.946199 | -2.573295 | -0.824538 |
| H | -3.371779 | -2.548165 | 0.308180  |
| C | -1.840205 | 0.148161  | -0.946644 |

|    |           |           |           |
|----|-----------|-----------|-----------|
| C  | -4.112427 | -0.189851 | -0.665902 |
| H  | -5.007928 | -0.745437 | -0.426162 |
| C  | -3.949599 | 1.061071  | -1.168252 |
| H  | -4.678250 | 1.811578  | -1.439463 |
| C  | 1.282205  | -0.397101 | 2.630233  |
| H  | 1.685316  | 0.098027  | 1.743724  |
| H  | 2.032212  | -1.096808 | 3.025193  |
| H  | 1.075601  | 0.362650  | 3.396708  |
| C  | -1.981233 | 2.463455  | -1.825709 |
| H  | -2.608996 | 2.914041  | -2.602730 |
| H  | -0.999243 | 2.178497  | -2.225135 |
| H  | -1.830544 | 3.195156  | -1.019216 |
| H  | 0.311499  | 0.628292  | -2.193261 |
| Cl | -0.053187 | -2.402971 | -2.172962 |
| Mn | 0.080763  | -0.132211 | -0.702760 |

### Mn1-ncp-IM3-o

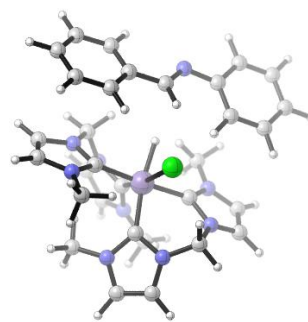

-1 1

|   |           |           |           |
|---|-----------|-----------|-----------|
| N | 3.172773  | -0.967395 | -1.550140 |
| N | 3.708410  | 0.746206  | -0.358863 |
| N | 1.638974  | -2.693626 | -0.997753 |
| N | 0.393556  | -2.881369 | 0.738191  |
| N | 0.384266  | 1.043393  | 2.519594  |
| N | 1.980802  | -0.411430 | 2.537601  |
| N | -0.096236 | 2.676100  | 0.891279  |
| N | 0.870741  | 3.048155  | -0.984894 |
| C | 2.571649  | 0.019014  | -0.757711 |
| C | 4.888231  | 0.199885  | -0.838836 |
| H | 5.853979  | 0.639478  | -0.634333 |
| C | 4.553895  | -0.889101 | -1.572690 |
| H | 5.167718  | -1.577508 | -2.135811 |
| C | 2.366201  | -2.047190 | -2.068211 |
| H | 1.635226  | -1.627410 | -2.771513 |
| H | 3.015909  | -2.780174 | -2.556790 |
| C | 0.854153  | -1.923083 | -0.153455 |
| C | 1.690198  | -4.026164 | -0.628376 |
| H | 2.237569  | -4.769472 | -1.189624 |
| C | 0.891749  | -4.141846 | 0.463421  |
| H | 0.603924  | -5.010403 | 1.037744  |

|    |           |           |           |
|----|-----------|-----------|-----------|
| C  | -0.506949 | -2.586102 | 1.826809  |
| H  | -1.001725 | -1.639834 | 1.582847  |
| H  | 0.033936  | -2.471811 | 2.776237  |
| H  | -1.251419 | -3.383689 | 1.919067  |
| C  | 3.665247  | 1.881001  | 0.523720  |
| H  | 4.405837  | 1.775538  | 1.326469  |
| H  | 2.665541  | 1.924498  | 0.961568  |
| H  | 3.858662  | 2.823576  | -0.008266 |
| C  | 1.058923  | 0.177591  | 1.642268  |
| C  | 1.861365  | 0.087470  | 3.826681  |
| H  | 2.481349  | -0.263537 | 4.639028  |
| C  | 0.870400  | 1.011092  | 3.812516  |
| H  | 0.457149  | 1.617264  | 4.605703  |
| C  | -0.632906 | 1.905637  | 1.984033  |
| H  | -1.437362 | 1.274359  | 1.573645  |
| H  | -1.005626 | 2.577373  | 2.763609  |
| C  | 0.451073  | 1.994100  | -0.186129 |
| C  | 0.058816  | 4.045330  | 0.806230  |
| H  | -0.337590 | 4.725808  | 1.545510  |
| C  | 0.663152  | 4.279359  | -0.386528 |
| H  | 0.917799  | 5.208766  | -0.875316 |
| C  | 2.949024  | -1.410237 | 2.178441  |
| H  | 2.973562  | -1.488058 | 1.091049  |
| H  | 2.691424  | -2.397374 | 2.588924  |
| H  | 3.948487  | -1.132860 | 2.539594  |
| C  | 1.564587  | 2.857643  | -2.235140 |
| H  | 1.199854  | 3.577778  | -2.976161 |
| H  | 1.352919  | 1.841314  | -2.582100 |
| H  | 2.649563  | 2.991136  | -2.116286 |
| Cl | -0.173889 | -0.088359 | -2.736463 |
| C  | -3.079890 | 0.231439  | -0.682885 |
| H  | -0.894119 | -0.196808 | 0.178930  |
| N  | -3.785100 | -0.580682 | 0.044617  |
| H  | -2.423282 | -0.091951 | -1.499767 |
| C  | -3.174814 | 1.675634  | -0.529138 |
| C  | -3.961232 | 2.277592  | 0.466691  |
| C  | -2.453235 | 2.493953  | -1.415749 |
| C  | -4.027910 | 3.661642  | 0.568120  |
| H  | -4.509139 | 1.627868  | 1.145002  |
| C  | -2.535735 | 3.876579  | -1.318306 |
| H  | -1.807247 | 2.010671  | -2.150714 |
| C  | -3.320447 | 4.468277  | -0.326396 |
| H  | -4.639191 | 4.120206  | 1.343923  |
| H  | -1.963222 | 4.499290  | -2.003038 |
| H  | -3.375037 | 5.552316  | -0.245053 |
| C  | -3.575405 | -1.948039 | -0.126310 |
| C  | -2.477001 | -2.516938 | -0.809139 |

|    |           |           |           |
|----|-----------|-----------|-----------|
| C  | -4.500600 | -2.817399 | 0.480953  |
| C  | -2.337510 | -3.898167 | -0.875909 |
| H  | -1.709222 | -1.878023 | -1.245256 |
| C  | -4.353463 | -4.196354 | 0.404887  |
| H  | -5.334506 | -2.368960 | 1.016642  |
| C  | -3.266549 | -4.749146 | -0.275078 |
| H  | -1.470357 | -4.311944 | -1.388730 |
| H  | -5.085856 | -4.844916 | 0.883069  |
| H  | -3.142656 | -5.828849 | -0.330185 |
| Mn | 0.711434  | 0.038486  | -0.198395 |

### Mn1-ncp-TS2-o

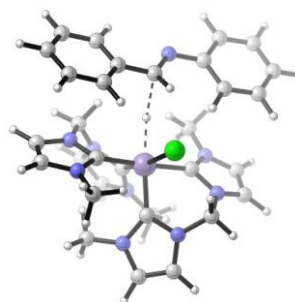

|    |           |           |           |
|----|-----------|-----------|-----------|
| -1 | 1         |           |           |
| N  | 0.594023  | -3.230528 | -1.450933 |
| N  | 2.357197  | -2.893854 | -0.256036 |
| N  | -1.641155 | -2.622696 | -0.928953 |
| N  | -2.351131 | -1.532402 | 0.775038  |
| N  | 1.183255  | 0.252117  | 2.473785  |
| N  | 0.550177  | -1.809834 | 2.538320  |
| N  | 2.429772  | 1.351659  | 0.800269  |
| N  | 3.167351  | 0.595099  | -1.064459 |
| C  | 1.195973  | -2.223479 | -0.683417 |
| C  | 2.413413  | -4.203965 | -0.705683 |
| H  | 3.244800  | -4.856061 | -0.479740 |
| C  | 1.297549  | -4.421318 | -1.442292 |
| H  | 0.969646  | -5.294605 | -1.987719 |
| C  | -0.735880 | -3.030831 | -1.980085 |
| H  | -0.697398 | -2.229845 | -2.728733 |
| H  | -1.091253 | -3.968956 | -2.417724 |
| C  | -1.311965 | -1.532283 | -0.140264 |
| C  | -2.786607 | -3.273281 | -0.503396 |
| H  | -3.200356 | -4.128350 | -1.017807 |
| C  | -3.240874 | -2.568669 | 0.564460  |
| H  | -4.137981 | -2.683900 | 1.155000  |
| C  | -2.500003 | -0.528213 | 1.801550  |
| H  | -1.853041 | 0.311665  | 1.530796  |
| H  | -2.195503 | -0.913246 | 2.784461  |
| H  | -3.539817 | -0.187068 | 1.842401  |
| C  | 3.349695  | -2.321041 | 0.613404  |

|    |           |           |           |
|----|-----------|-----------|-----------|
| H  | 3.569913  | -2.996914 | 1.449598  |
| H  | 2.952530  | -1.384053 | 1.006949  |
| H  | 4.287693  | -2.109189 | 0.080563  |
| C  | 0.662228  | -0.737248 | 1.624752  |
| C  | 0.994081  | -1.473500 | 3.808785  |
| H  | 0.965896  | -2.174140 | 4.630745  |
| C  | 1.406907  | -0.184326 | 3.765489  |
| H  | 1.803506  | 0.458674  | 4.537737  |
| C  | 1.526501  | 1.527799  | 1.910749  |
| H  | 0.609272  | 1.996173  | 1.529364  |
| H  | 1.997247  | 2.159726  | 2.670132  |
| C  | 2.047473  | 0.526977  | -0.248390 |
| C  | 3.713311  | 1.842248  | 0.669585  |
| H  | 4.149169  | 2.532241  | 1.377157  |
| C  | 4.176255  | 1.368264  | -0.514643 |
| H  | 5.112022  | 1.543468  | -1.025409 |
| C  | 0.056398  | -3.122148 | 2.220201  |
| H  | -0.019070 | -3.212518 | 1.136673  |
| H  | -0.939220 | -3.300308 | 2.650748  |
| H  | 0.741929  | -3.894076 | 2.594320  |
| C  | 3.306229  | -0.170577 | -2.279670 |
| H  | 3.763942  | 0.447074  | -3.059828 |
| H  | 2.304816  | -0.472774 | -2.600450 |
| H  | 3.932319  | -1.060501 | -2.120792 |
| Cl | -0.081938 | 0.056023  | -2.776959 |
| C  | -1.211591 | 2.538847  | -0.597880 |
| H  | -0.468738 | 0.998863  | 0.028267  |
| N  | -2.281980 | 2.816349  | 0.119400  |
| H  | -1.245754 | 1.970543  | -1.533960 |
| C  | -0.026777 | 3.406500  | -0.485841 |
| C  | 0.073465  | 4.401069  | 0.494974  |
| C  | 1.021493  | 3.250191  | -1.404902 |
| C  | 1.202545  | 5.212039  | 0.564908  |
| H  | -0.758139 | 4.515061  | 1.186268  |
| C  | 2.140999  | 4.071175  | -1.341263 |
| H  | 0.940817  | 2.450913  | -2.143271 |
| C  | 2.240642  | 5.052079  | -0.353471 |
| H  | 1.270852  | 5.981736  | 1.332330  |
| H  | 2.951969  | 3.931300  | -2.053641 |
| H  | 3.121594  | 5.689442  | -0.300078 |
| C  | -3.408010 | 2.049375  | -0.113940 |
| C  | -3.456774 | 0.896172  | -0.935441 |
| C  | -4.591799 | 2.413406  | 0.564426  |
| C  | -4.631885 | 0.162879  | -1.051524 |
| H  | -2.559792 | 0.549498  | -1.447430 |
| C  | -5.760138 | 1.675582  | 0.437310  |
| H  | -4.549717 | 3.293877  | 1.202463  |

|    |           |           |           |
|----|-----------|-----------|-----------|
| C  | -5.792109 | 0.536621  | -0.371878 |
| H  | -4.631087 | -0.732694 | -1.671822 |
| H  | -6.654256 | 1.985768  | 0.976945  |
| H  | -6.704380 | -0.048381 | -0.468716 |
| Mn | 0.386860  | -0.537770 | -0.232088 |

### Co3-ncp-2

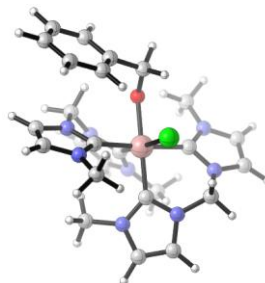

|     |           |           |           |
|-----|-----------|-----------|-----------|
| 1 1 |           |           |           |
| N   | 2.722715  | 1.645017  | -0.908068 |
| N   | 1.730464  | 2.480781  | 0.794349  |
| N   | 2.998246  | -0.621400 | -1.582175 |
| N   | 2.270276  | -2.450991 | -0.747310 |
| N   | -0.365210 | -0.862226 | 2.416042  |
| N   | 1.776466  | -0.833666 | 2.336575  |
| N   | -1.975967 | 0.517371  | 1.337820  |
| N   | -1.748992 | 2.130919  | -0.045341 |
| C   | 1.639684  | 1.454129  | -0.099662 |
| C   | 2.818044  | 3.295791  | 0.524942  |
| H   | 3.041616  | 4.167557  | 1.118699  |
| C   | 3.449324  | 2.765250  | -0.548307 |
| H   | 4.331800  | 3.079509  | -1.082271 |
| C   | 3.070796  | 0.760235  | -2.005800 |
| H   | 2.375616  | 0.924342  | -2.833885 |
| H   | 4.096888  | 0.977942  | -2.307694 |
| C   | 1.944026  | -1.142201 | -0.890274 |
| C   | 3.946269  | -1.583573 | -1.882091 |
| H   | 4.832961  | -1.366188 | -2.455940 |
| C   | 3.482206  | -2.739816 | -1.351765 |
| H   | 3.893225  | -3.736690 | -1.356460 |
| C   | 1.513574  | -3.434136 | 0.016785  |
| H   | 0.501753  | -3.035094 | 0.143847  |
| H   | 2.002955  | -3.617551 | 0.979660  |
| H   | 1.479140  | -4.370425 | -0.542701 |
| C   | 0.827711  | 2.739376  | 1.902913  |
| H   | 1.395539  | 3.170450  | 2.728632  |
| H   | 0.370720  | 1.807029  | 2.231003  |
| H   | 0.037639  | 3.437153  | 1.612653  |
| C   | 0.671445  | -0.600635 | 1.573657  |
| C   | 1.427616  | -1.259723 | 3.608090  |
| H   | 2.168576  | -1.502659 | 4.352660  |

|    |           |           |           |   |           |           |           |
|----|-----------|-----------|-----------|---|-----------|-----------|-----------|
| C  | 0.075018  | -1.272622 | 3.660007  | N | -0.368004 | 2.030896  | 1.541755  |
| H  | -0.603870 | -1.529610 | 4.457280  | N | 2.846075  | 0.819993  | -0.688822 |
| C  | -1.764263 | -0.722300 | 2.049980  | N | 2.820815  | -1.317459 | -0.693135 |
| H  | -2.055075 | -1.558794 | 1.412005  | N | -1.515812 | -2.027541 | 0.874416  |
| H  | -2.353499 | -0.695409 | 2.969409  | N | 0.217008  | -1.580472 | 2.040445  |
| C  | -1.176585 | 0.957109  | 0.325239  | N | -2.802923 | -0.635556 | -0.567215 |
| C  | -3.037887 | 1.369970  | 1.567826  | N | -2.556111 | 1.393483  | -1.201637 |
| H  | -3.800619 | 1.161401  | 2.300806  | C | 0.311038  | 1.506529  | 0.479632  |
| C  | -2.895143 | 2.387614  | 0.687483  | C | 0.245337  | 3.181218  | 2.017502  |
| H  | -3.504268 | 3.258697  | 0.506529  | H | -0.151137 | 3.736590  | 2.852436  |
| C  | 3.161084  | -0.707055 | 1.917427  | C | 1.343338  | 3.389890  | 1.253886  |
| H  | 3.233667  | -0.002697 | 1.091429  | H | 2.094817  | 4.162516  | 1.284531  |
| H  | 3.563178  | -1.672046 | 1.594961  | C | 2.347818  | 2.173023  | -0.719541 |
| H  | 3.754671  | -0.338742 | 2.755475  | H | 1.872607  | 2.358141  | -1.690359 |
| C  | -1.290285 | 3.030321  | -1.090802 | H | 3.172747  | 2.870772  | -0.568443 |
| H  | -1.800067 | 2.812260  | -2.031509 | C | 1.990073  | -0.243879 | -0.673806 |
| H  | -0.223276 | 2.892486  | -1.253548 | C | 4.172223  | 0.425430  | -0.735926 |
| H  | -1.500244 | 4.057461  | -0.783795 | H | 4.990867  | 1.126135  | -0.768462 |
| Cl | 0.024870  | 0.520745  | -2.494237 | C | 4.149647  | -0.928746 | -0.742136 |
| O  | -0.746070 | -1.655559 | -0.318525 | H | 4.952734  | -1.647284 | -0.778905 |
| C  | -1.626943 | -1.958882 | -1.367792 | C | 2.408004  | -2.711227 | -0.687694 |
| H  | -1.721465 | -3.060670 | -1.396726 | H | 1.406161  | -2.783744 | -0.267954 |
| H  | -1.235656 | -1.651983 | -2.347349 | H | 3.117173  | -3.287129 | -0.088876 |
| C  | -2.999565 | -1.366626 | -1.156967 | H | 2.368986  | -3.100510 | -1.705790 |
| C  | -3.902389 | -1.975746 | -0.277174 | C | -1.581445 | 1.495998  | 2.130830  |
| C  | -3.386943 | -0.179475 | -1.787085 | H | -1.441195 | 1.348414  | 3.204565  |
| C  | -5.150054 | -1.411959 | -0.019127 | H | -1.813400 | 0.540840  | 1.665054  |
| H  | -3.625913 | -2.921280 | 0.190536  | H | -2.418472 | 2.182123  | 1.972872  |
| C  | -4.634878 | 0.386872  | -1.535896 | C | -0.364722 | -1.294931 | 0.840927  |
| H  | -2.693458 | 0.290531  | -2.481986 | C | -0.541538 | -2.472274 | 2.782848  |
| C  | -5.519455 | -0.225271 | -0.649788 | H | -0.231621 | -2.825142 | 3.753608  |
| H  | -5.844550 | -1.910376 | 0.652480  | C | -1.643295 | -2.752312 | 2.046043  |
| H  | -4.924760 | 1.303890  | -2.044809 | H | -2.483662 | -3.399118 | 2.242405  |
| H  | -6.497606 | 0.209939  | -0.464441 | C | -2.482245 | -2.002975 | -0.209054 |
| Co | 0.412583  | -0.060339 | -0.259588 | H | -2.050905 | -2.502091 | -1.083220 |
|    |           |           |           | H | -3.393272 | -2.503534 | 0.122265  |
|    |           |           |           | C | -1.843140 | 0.295975  | -0.835840 |
|    |           |           |           | C | -4.077615 | -0.139800 | -0.778915 |
|    |           |           |           | H | -4.963750 | -0.740663 | -0.651237 |
|    |           |           |           | C | -3.919303 | 1.144847  | -1.177430 |
|    |           |           |           | H | -4.643976 | 1.893206  | -1.455075 |
|    |           |           |           | C | 1.468597  | -1.020105 | 2.512868  |
|    |           |           |           | H | 1.760000  | -0.204756 | 1.851371  |
|    |           |           |           | H | 2.257612  | -1.777309 | 2.515976  |
|    |           |           |           | H | 1.344362  | -0.635129 | 3.527880  |
|    |           |           |           | C | -1.980285 | 2.676637  | -1.555555 |
|    |           |           |           | H | -2.622949 | 3.172021  | -2.283700 |

### Co3-ncp-3

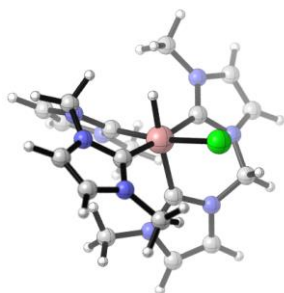

1 1

N 1.365683 2.363400 0.326992

|    |           |           |           |
|----|-----------|-----------|-----------|
| H  | -0.996415 | 2.505768  | -1.993318 |
| H  | -1.877566 | 3.319508  | -0.674729 |
| H  | 0.289015  | 0.927630  | -1.773471 |
| Cl | -0.132183 | -1.651012 | -2.305237 |
| Co | 0.060974  | -0.012483 | -0.634883 |

**Co3-ncp-IM3-o**

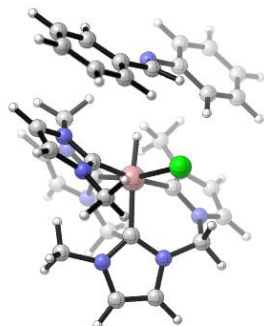

1 1

|    |           |           |           |
|----|-----------|-----------|-----------|
| Co | -0.640765 | -0.468380 | -0.135879 |
| N  | -2.979515 | -1.668067 | -1.514581 |
| N  | -2.236573 | -3.140683 | -0.157114 |
| N  | -3.050224 | 0.704925  | -1.315203 |
| N  | -2.361167 | 1.992104  | 0.251656  |
| N  | 0.129585  | -0.433165 | 2.628387  |
| N  | -2.010514 | -0.540385 | 2.543108  |
| N  | 1.736302  | -1.433113 | 1.220616  |
| N  | 1.486162  | -2.628533 | -0.533245 |
| C  | -1.967754 | -1.888938 | -0.624454 |
| C  | -3.367274 | -3.681808 | -0.749130 |
| H  | -3.726485 | -4.670700 | -0.512313 |
| C  | -3.841905 | -2.746224 | -1.606839 |
| H  | -4.692310 | -2.757420 | -2.270101 |
| C  | -3.115310 | -0.413374 | -2.235338 |
| H  | -2.297637 | -0.327314 | -2.957767 |
| H  | -4.083831 | -0.400577 | -2.737358 |
| C  | -2.050409 | 0.838372  | -0.395768 |
| C  | -3.947281 | 1.757643  | -1.258379 |
| H  | -4.787956 | 1.842096  | -1.928422 |
| C  | -3.506015 | 2.571481  | -0.268746 |
| H  | -3.887110 | 3.511357  | 0.098017  |
| C  | -1.613750 | 2.567926  | 1.355499  |
| H  | -0.612620 | 2.137698  | 1.359324  |
| H  | -2.112550 | 2.361639  | 2.308474  |
| H  | -1.526649 | 3.647213  | 1.211969  |
| C  | -1.464064 | -3.825354 | 0.861658  |
| H  | -2.126117 | -4.186259 | 1.652623  |
| H  | -0.745782 | -3.123015 | 1.284552  |
| H  | -0.925537 | -4.676575 | 0.436125  |

|    |           |           |           |
|----|-----------|-----------|-----------|
| C  | -0.907061 | -0.497190 | 1.740739  |
| C  | -1.660510 | -0.488284 | 3.885062  |
| H  | -2.400061 | -0.508443 | 4.669519  |
| C  | -0.308974 | -0.426210 | 3.939230  |
| H  | 0.367541  | -0.378221 | 4.777384  |
| C  | 1.507264  | -0.376757 | 2.176439  |
| H  | 1.704640  | 0.596117  | 1.700095  |
| H  | 2.170356  | -0.511724 | 3.032647  |
| C  | 0.925482  | -1.587280 | 0.134908  |
| C  | 2.780756  | -2.338171 | 1.227414  |
| H  | 3.543850  | -2.343409 | 1.988589  |
| C  | 2.621824  | -3.089603 | 0.112507  |
| H  | 3.218804  | -3.893545 | -0.287404 |
| C  | -3.389449 | -0.607162 | 2.098063  |
| H  | -3.409918 | -0.788372 | 1.025335  |
| H  | -3.908741 | 0.332397  | 2.309542  |
| H  | -3.906577 | -1.421034 | 2.611989  |
| C  | 1.020561  | -3.179099 | -1.792637 |
| H  | 1.610486  | -2.781086 | -2.621266 |
| H  | -0.015089 | -2.883357 | -1.950426 |
| H  | 1.109119  | -4.267797 | -1.763245 |
| Cl | 0.054059  | -0.155564 | -2.381127 |
| C  | 2.691298  | 1.617307  | -0.840874 |
| H  | 0.265534  | 0.666722  | 0.155307  |
| N  | 2.327067  | 2.403882  | 0.110342  |
| H  | 2.278967  | 1.692635  | -1.858050 |
| C  | 3.706893  | 0.588319  | -0.657055 |
| C  | 4.521117  | 0.547056  | 0.486904  |
| C  | 3.924365  | -0.342279 | -1.683414 |
| C  | 5.541046  | -0.390037 | 0.585856  |
| H  | 4.362054  | 1.293895  | 1.261252  |
| C  | 4.940386  | -1.286188 | -1.575770 |
| H  | 3.285652  | -0.307287 | -2.564508 |
| C  | 5.756430  | -1.306184 | -0.446321 |
| H  | 6.189818  | -0.395297 | 1.457907  |
| H  | 5.108698  | -1.995699 | -2.381832 |
| H  | 6.567469  | -2.025450 | -0.373333 |
| C  | 1.362392  | 3.388859  | -0.154425 |
| C  | 0.383828  | 3.282815  | -1.158893 |
| C  | 1.370676  | 4.524154  | 0.669193  |
| C  | -0.532358 | 4.311622  | -1.346900 |
| H  | 0.319435  | 2.378469  | -1.761645 |
| C  | 0.456625  | 5.552099  | 0.468161  |
| H  | 2.124747  | 4.587985  | 1.448713  |
| C  | -0.499286 | 5.452213  | -0.543564 |
| H  | -1.285314 | 4.216180  | -2.126270 |
| H  | 0.491300  | 6.435230  | 1.099859  |

H -1.211643 6.256702 -0.703907

**Co3-ncp-TS2-o**

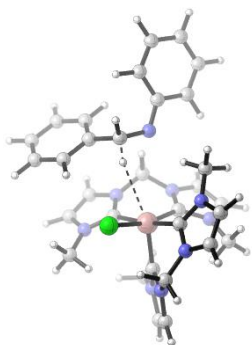

1 1

N 4.086922 -0.046915 -0.609183  
N 3.666045 0.929073 1.252438  
N 2.924891 -1.787880 -1.746054  
N 1.061538 -2.768072 -1.354266  
N -0.279833 -0.526708 2.222032  
N 1.337105 -1.923353 2.025686  
N -0.569890 1.692437 1.442544  
N 0.691638 2.992391 0.300369  
C 3.049542 0.373359 0.172490  
C 5.045477 0.876073 1.130090  
H 5.704106 1.279576 1.882503  
C 5.313436 0.255113 -0.043552  
H 6.248972 0.010309 -0.520735  
C 3.896002 -0.723061 -1.880083  
H 3.533057 -0.002088 -2.619998  
H 4.850331 -1.149566 -2.193480  
C 1.714153 -1.599869 -1.149330  
C 3.018999 -3.040127 -2.328281  
H 3.890605 -3.363461 -2.874717  
C 1.840210 -3.659496 -2.075436  
H 1.483162 -4.639325 -2.349389  
C -0.270294 -3.072213 -0.852887  
H -0.804016 -2.155396 -0.569755  
H -0.207126 -3.736796 0.016105  
H -0.845975 -3.572069 -1.633970  
C 2.987207 1.530826 2.386731  
H 2.047006 1.008767 2.565797  
H 2.773457 2.587017 2.200597  
H 3.622824 1.445700 3.268602  
C 0.732897 -0.878626 1.373999  
C 0.679691 -2.230898 3.202818  
H 1.005138 -3.032125 3.846882  
C -0.343754 -1.352484 3.326431  
H -1.096767 -1.238574 4.089730

C -1.243695 0.507242 1.917655  
H -1.923420 0.106045 1.131874  
H -1.795941 0.754049 2.826032  
C 0.423449 1.672066 0.503460  
C -0.946177 2.978667 1.769467  
H -1.755602 3.190729 2.449157  
C -0.143659 3.797703 1.047945  
H -0.100059 4.873736 0.992941  
C 2.513540 -2.650760 1.586441  
H 3.022966 -3.055653 2.461577  
H 3.191483 -1.979024 1.060840  
H 2.248652 -3.476373 0.919523  
C 1.700071 3.537758 -0.590909  
H 1.263840 3.773397 -1.563585  
H 2.484622 2.798797 -0.747465  
H 2.116256 4.441091 -0.139216  
Cl 1.229861 0.972295 -2.379942  
C -2.329261 0.036370 -1.457026  
H -1.256284 0.027102 -1.730904  
N -2.495017 -0.917699 -0.392606  
H -2.884829 -0.251290 -2.368635  
C -2.686605 1.473665 -1.123087  
C -3.680129 1.791318 -0.190603  
C -2.029133 2.519909 -1.782021  
C -4.034200 3.119005 0.049120  
H -4.196188 0.992286 0.337536  
C -2.380342 3.844889 -1.538960  
H -1.235175 2.281917 -2.487586  
C -3.390558 4.150677 -0.627899  
H -4.824422 3.344268 0.760929  
H -1.867473 4.643184 -2.071135  
H -3.673418 5.184304 -0.448828  
C -3.697508 -1.501343 -0.218312  
C -4.882277 -1.236362 -0.970999  
C -3.792674 -2.492701 0.806558  
C -6.048430 -1.941300 -0.729145  
H -4.869632 -0.463036 -1.733887  
C -4.966775 -3.177049 1.043035  
H -2.894732 -2.692870 1.390897  
C -6.107386 -2.913846 0.273073  
H -6.934644 -1.724687 -1.319739  
H -5.006914 -3.928097 1.827626  
H -7.030391 -3.453766 0.458508  
Co 1.192379 0.043444 -0.252853

**Fe3-ncp-1**

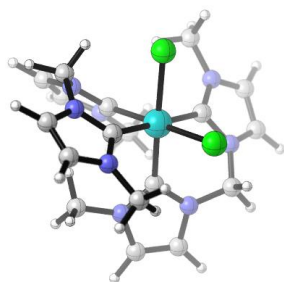

1 2

|    |           |           |           |
|----|-----------|-----------|-----------|
| Fe | -0.000157 | 0.000136  | -0.610734 |
| N  | -1.343044 | -2.213832 | 0.834625  |
| N  | 0.460106  | -1.749151 | 1.894942  |
| N  | -2.853172 | -0.846292 | -0.398766 |
| N  | -2.850473 | 1.251056  | -0.800171 |
| N  | 1.343647  | 2.213794  | 0.834254  |
| N  | -0.459202 | 1.749232  | 1.895155  |
| N  | 2.853111  | 0.846253  | -0.400010 |
| N  | 2.849968  | -1.251210 | -0.800855 |
| C  | -0.259347 | -1.385085 | 0.794618  |
| C  | -0.146831 | -2.791480 | 2.572847  |
| H  | 0.281205  | -3.220492 | 3.464668  |
| C  | -1.286420 | -3.086565 | 1.902076  |
| H  | -2.047921 | -3.827548 | 2.085944  |
| C  | -2.407941 | -2.198627 | -0.154626 |
| H  | -2.034664 | -2.637160 | -1.084939 |
| H  | -3.245334 | -2.776591 | 0.240090  |
| C  | -2.003160 | 0.199972  | -0.629974 |
| C  | -4.182438 | -0.466739 | -0.451046 |
| H  | -4.993345 | -1.164924 | -0.318633 |
| C  | -4.176144 | 0.861123  | -0.709686 |
| H  | -4.986551 | 1.559877  | -0.842266 |
| C  | -2.480063 | 2.642219  | -1.016544 |
| H  | -1.524600 | 2.847828  | -0.536310 |
| H  | -3.259759 | 3.275191  | -0.587560 |
| H  | -2.369079 | 2.851726  | -2.080429 |
| C  | 1.725892  | -1.181163 | 2.327756  |
| H  | 1.756810  | -1.170936 | 3.418181  |
| H  | 1.819916  | -0.163041 | 1.955566  |
| H  | 2.565126  | -1.773100 | 1.952540  |
| C  | 0.259727  | 1.385318  | 0.794458  |
| C  | 0.148343  | 2.791087  | 2.573230  |
| H  | -0.279294 | 3.220038  | 3.465273  |
| C  | 1.287737  | 3.086117  | 1.902079  |
| H  | 2.049415  | 3.826956  | 2.085792  |
| C  | 2.407995  | 2.198588  | -0.155602 |
| H  | 2.034077  | 2.637012  | -1.085700 |
| H  | 3.245586  | 2.776650  | 0.238529  |
| C  | 2.002865  | -0.199878 | -0.630998 |

|    |           |           |           |
|----|-----------|-----------|-----------|
| C  | 4.182283  | 0.466336  | -0.451772 |
| H  | 4.993338  | 1.164364  | -0.319433 |
| C  | 4.175716  | -0.861569 | -0.710208 |
| H  | 4.985977  | -1.560518 | -0.842652 |
| C  | -1.725005 | 1.181429  | 2.328163  |
| H  | -1.818727 | 0.162880  | 1.957053  |
| H  | -2.564282 | 1.772748  | 1.952058  |
| H  | -1.756224 | 1.172419  | 3.418564  |
| C  | 2.479298  | -2.642228 | -1.017712 |
| H  | 2.367139  | -2.851048 | -2.081599 |
| H  | 1.524384  | -2.848236 | -0.536515 |
| H  | 3.259467  | -3.275455 | -0.589982 |
| Cl | -0.209796 | -1.625707 | -2.248960 |
| Cl | 0.208608  | 1.626044  | -2.249023 |

### Fe3-ncpq-1

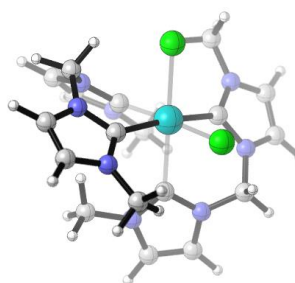

1 4

|    |           |           |           |
|----|-----------|-----------|-----------|
| Fe | 0.031998  | 0.152892  | -0.748987 |
| N  | 1.648610  | 1.964632  | 1.103290  |
| N  | -0.175084 | 1.568486  | 2.141794  |
| N  | 2.971458  | 0.571137  | -0.298466 |
| N  | 2.705376  | -1.457857 | -0.927652 |
| N  | -1.654968 | -2.233239 | 0.612137  |
| N  | 0.077171  | -2.103367 | 1.843116  |
| N  | -2.912052 | -0.543733 | -0.513659 |
| N  | -2.723278 | 1.586338  | -0.629853 |
| C  | 0.457553  | 1.317437  | 0.963293  |
| C  | 0.592343  | 2.363488  | 2.975947  |
| H  | 0.249352  | 2.676356  | 3.949386  |
| C  | 1.751063  | 2.613216  | 2.318511  |
| H  | 2.618796  | 3.188062  | 2.600793  |
| C  | 2.681032  | 1.938252  | 0.082617  |
| H  | 2.326441  | 2.487328  | -0.797616 |
| H  | 3.586884  | 2.388573  | 0.489721  |
| C  | 2.009792  | -0.321915 | -0.671008 |
| C  | 4.234284  | 0.017602  | -0.350208 |
| H  | 5.125262  | 0.576974  | -0.114022 |
| C  | 4.061241  | -1.266771 | -0.749548 |
| H  | 4.776070  | -2.054869 | -0.924285 |
| C  | 2.146311  | -2.739206 | -1.335121 |



|    |           |           |           |   |           |           |           |
|----|-----------|-----------|-----------|---|-----------|-----------|-----------|
| H  | 1.144289  | -2.841361 | -0.921621 | N | 0.123553  | -1.798881 | 1.997767  |
| H  | 2.796199  | -3.532244 | -0.961010 | N | -3.074321 | -0.644643 | -0.364689 |
| H  | 2.068856  | -2.791568 | -2.421312 | N | -2.974071 | 1.451050  | -0.748040 |
| C  | -1.493147 | 1.086009  | 2.514995  | C | 0.456517  | 1.480035  | 0.810464  |
| H  | -1.474292 | 0.739484  | 3.550382  | C | 0.683702  | 2.613703  | 2.774161  |
| H  | -1.766093 | 0.256402  | 1.865145  | H | 0.378648  | 2.980165  | 3.741752  |
| H  | -2.238788 | 1.880029  | 2.418661  | C | 1.823256  | 2.810981  | 2.067489  |
| C  | -0.451762 | -1.601222 | 0.696199  | H | 2.710493  | 3.380836  | 2.295005  |
| C  | -0.763188 | -3.026083 | 2.445236  | C | 2.659696  | 2.021202  | -0.169672 |
| H  | -0.503778 | -3.540719 | 3.357163  | H | 2.228774  | 2.397575  | -1.102324 |
| C  | -1.870120 | -3.104410 | 1.665218  | H | 3.528604  | 2.615436  | 0.114092  |
| H  | -2.765245 | -3.698851 | 1.761079  | C | 2.192415  | -0.346631 | -0.678016 |
| C  | -2.585616 | -1.956869 | -0.466644 | C | 4.370012  | 0.174772  | -0.254134 |
| H  | -2.123164 | -2.237239 | -1.418900 | H | 5.207636  | 0.814985  | -0.026845 |
| H  | -3.503569 | -2.519904 | -0.296071 | C | 4.302955  | -1.157163 | -0.503920 |
| C  | -1.981974 | 0.449642  | -0.627468 | H | 5.074826  | -1.909837 | -0.534329 |
| C  | -4.196669 | -0.038895 | -0.466447 | C | 2.490918  | -2.789330 | -1.053707 |
| H  | -5.065807 | -0.672597 | -0.391955 | H | 1.498374  | -2.920294 | -0.622045 |
| C  | -4.074640 | 1.307855  | -0.549766 | H | 3.183899  | -3.519136 | -0.633049 |
| H  | -4.819846 | 2.086872  | -0.565077 | H | 2.410613  | -2.930163 | -2.132583 |
| C  | 1.373620  | -1.730277 | 2.378432  | C | -1.439508 | 1.356004  | 2.423201  |
| H  | 1.737936  | -0.860890 | 1.830958  | H | -1.390890 | 0.983124  | 3.449076  |
| H  | 2.089303  | -2.549722 | 2.268906  | H | -1.767864 | 0.553928  | 1.763503  |
| H  | 1.283340  | -1.477084 | 3.437553  | H | -2.159373 | 2.177845  | 2.377107  |
| C  | -2.210143 | 2.945951  | -0.711530 | C | -0.456761 | -1.480032 | 0.810367  |
| H  | -2.035823 | 3.227893  | -1.750330 | C | -0.684628 | -2.613447 | 2.774133  |
| H  | -1.256481 | 3.006993  | -0.188199 | H | -0.379897 | -2.979809 | 3.741863  |
| H  | -2.938607 | 3.615766  | -0.252080 | C | -1.823962 | -2.810765 | 2.067115  |
| Cl | 0.464657  | 2.037833  | -2.160571 | H | -2.711296 | -3.380558 | 2.294414  |
| Cl | -0.334285 | -1.233037 | -2.606769 | C | -2.659658 | -2.021208 | -0.170398 |

### Fe3-ncps-1

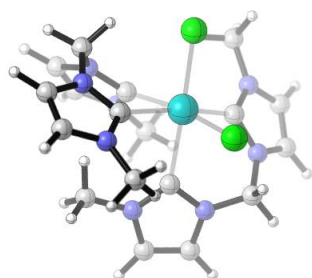

1 6

|    |           |           |           |    |           |           |           |
|----|-----------|-----------|-----------|----|-----------|-----------|-----------|
| Fe | 0.000141  | -0.000064 | -0.927706 | C  | -2.490533 | 2.789283  | -1.054613 |
| N  | 1.661004  | 2.118823  | 0.880721  | H  | -2.409866 | 2.930069  | -2.133467 |
| N  | -0.124195 | 1.799012  | 1.997632  | H  | -1.498132 | 2.920259  | -0.622623 |
| N  | 3.074431  | 0.644631  | -0.363746 | H  | -3.183649 | 3.519111  | -0.634216 |
| N  | 2.974342  | -1.451080 | -0.747030 | Cl | 0.305742  | 1.729867  | -2.439471 |
| N  | -1.661295 | -2.118767 | 0.880314  | Cl | -0.304965 | -1.730062 | -2.439487 |

**Fe3-ncp-2**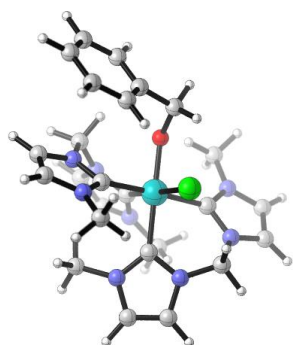

1 2

|    |           |           |           |
|----|-----------|-----------|-----------|
| Fe | 0.382469  | -0.149903 | -0.252371 |
| N  | 2.748024  | 1.510191  | -1.055912 |
| N  | 1.750741  | 2.527231  | 0.540173  |
| N  | 3.049019  | -0.812387 | -1.468175 |
| N  | 2.316879  | -2.546222 | -0.453045 |
| N  | -0.467283 | -0.527597 | 2.507789  |
| N  | 1.674867  | -0.558799 | 2.495696  |
| N  | -2.004434 | 0.769701  | 1.228045  |
| N  | -1.696217 | 2.197044  | -0.334562 |
| C  | 1.657488  | 1.408859  | -0.238854 |
| C  | 2.845018  | 3.302911  | 0.193400  |
| H  | 3.068981  | 4.232599  | 0.691486  |
| C  | 3.481742  | 2.655568  | -0.810031 |
| H  | 4.372346  | 2.903311  | -1.365091 |
| C  | 3.099718  | 0.512116  | -2.049316 |
| H  | 2.389320  | 0.567376  | -2.879920 |
| H  | 4.118653  | 0.707505  | -2.387870 |
| C  | 1.987791  | -1.259726 | -0.739825 |
| C  | 4.007364  | -1.794152 | -1.645900 |
| H  | 4.905599  | -1.631732 | -2.219933 |
| C  | 3.540386  | -2.891145 | -1.003848 |
| H  | 3.957882  | -3.879380 | -0.895220 |
| C  | 1.545992  | -3.451442 | 0.384622  |
| H  | 0.563023  | -3.007950 | 0.549681  |
| H  | 2.064299  | -3.617978 | 1.334489  |
| H  | 1.431093  | -4.409651 | -0.125712 |
| C  | 0.849957  | 2.906322  | 1.614439  |
| H  | 1.425687  | 3.385046  | 2.408263  |
| H  | 0.360150  | 2.019521  | 2.012936  |
| H  | 0.085639  | 3.603944  | 1.260805  |
| C  | 0.601683  | -0.439449 | 1.658866  |
| C  | 1.278119  | -0.736898 | 3.812181  |
| H  | 1.989657  | -0.861134 | 4.612743  |
| C  | -0.074964 | -0.710104 | 3.822054  |
| H  | -0.781880 | -0.806171 | 4.630676  |

|    |           |           |           |
|----|-----------|-----------|-----------|
| C  | -1.844670 | -0.397579 | 2.069970  |
| H  | -2.137260 | -1.288330 | 1.509659  |
| H  | -2.476985 | -0.276429 | 2.951537  |
| C  | -1.177565 | 1.053171  | 0.178852  |
| C  | -3.028355 | 1.689105  | 1.342856  |
| H  | -3.804938 | 1.604695  | 2.086286  |
| C  | -2.831443 | 2.591022  | 0.351658  |
| H  | -3.394046 | 3.466662  | 0.069546  |
| C  | 3.071217  | -0.530811 | 2.101275  |
| H  | 3.184487  | 0.058216  | 1.192485  |
| H  | 3.451259  | -1.539927 | 1.915846  |
| H  | 3.658984  | -0.074325 | 2.899164  |
| C  | -1.183551 | 2.939909  | -1.474429 |
| H  | -1.737693 | 2.677176  | -2.378064 |
| H  | -0.140876 | 2.677631  | -1.640674 |
| H  | -1.286410 | 4.009049  | -1.273853 |
| Cl | 0.041198  | 0.208547  | -2.614179 |
| O  | -0.743157 | -1.648585 | -0.186448 |
| C  | -1.600184 | -2.124413 | -1.206873 |
| H  | -1.652430 | -3.220146 | -1.094479 |
| H  | -1.203475 | -1.900017 | -2.203182 |
| C  | -2.978832 | -1.539121 | -1.042984 |
| C  | -3.890721 | -2.114963 | -0.152180 |
| C  | -3.345898 | -0.371706 | -1.721033 |
| C  | -5.138566 | -1.535326 | 0.068428  |
| H  | -3.620246 | -3.038012 | 0.360250  |
| C  | -4.592934 | 0.208399  | -1.503973 |
| H  | -2.636349 | 0.068852  | -2.419264 |
| C  | -5.491009 | -0.368706 | -0.606979 |
| H  | -5.842833 | -2.003689 | 0.750840  |
| H  | -4.871125 | 1.109382  | -2.046424 |
| H  | -6.467680 | 0.079608  | -0.447047 |

**Fe3-ncp-TS1-o**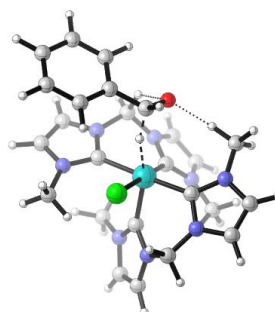

1 2

|    |          |           |           |
|----|----------|-----------|-----------|
| Fe | 0.405797 | -0.069865 | -0.270846 |
| N  | 2.693642 | 1.607110  | -1.003436 |
| N  | 1.699132 | 2.497216  | 0.676477  |
| N  | 2.983918 | -0.670043 | -1.638277 |

|   |           |           |           |
|---|-----------|-----------|-----------|
| N | 2.312503  | -2.499645 | -0.765251 |
| N | -0.256733 | -0.584829 | 2.563850  |
| N | 1.870913  | -0.690122 | 2.337066  |
| N | -1.935452 | 0.656492  | 1.418889  |
| N | -1.827436 | 2.098369  | -0.153771 |
| C | 1.620305  | 1.429435  | -0.174937 |
| C | 2.767143  | 3.317565  | 0.359018  |
| H | 2.981506  | 4.215851  | 0.915303  |
| C | 3.396215  | 2.756703  | -0.700189 |
| H | 4.264873  | 3.067165  | -1.258397 |
| C | 3.048901  | 0.703307  | -2.082259 |
| H | 2.362981  | 0.855395  | -2.919635 |
| H | 4.076799  | 0.921621  | -2.378627 |
| C | 1.941957  | -1.198056 | -0.922344 |
| C | 3.956108  | -1.610436 | -1.925083 |
| H | 4.834635  | -1.378493 | -2.505975 |
| C | 3.526191  | -2.768545 | -1.373392 |
| H | 3.962017  | -3.754799 | -1.364161 |
| C | 1.614212  | -3.498257 | 0.029332  |
| H | 0.586250  | -3.170814 | 0.218235  |
| H | 2.142374  | -3.657180 | 0.976019  |
| H | 1.596204  | -4.441978 | -0.518762 |
| C | 0.798626  | 2.805910  | 1.774428  |
| H | 1.346956  | 3.376192  | 2.524950  |
| H | 0.427506  | 1.886914  | 2.223618  |
| H | -0.052551 | 3.398526  | 1.428683  |
| C | 0.723559  | -0.505511 | 1.613518  |
| C | 1.597194  | -0.915790 | 3.674462  |
| H | 2.378450  | -1.093503 | 4.395940  |
| C | 0.252222  | -0.852353 | 3.818238  |
| H | -0.377312 | -0.973277 | 4.685183  |
| C | -1.670001 | -0.491912 | 2.259366  |
| H | -1.965964 | -1.411717 | 1.735647  |
| H | -2.218108 | -0.370749 | 3.195354  |
| C | -1.188365 | 0.990850  | 0.321553  |
| C | -3.024167 | 1.487149  | 1.588052  |
| H | -3.746462 | 1.345608  | 2.376017  |
| C | -2.951989 | 2.399648  | 0.590668  |
| H | -3.593395 | 3.230449  | 0.343684  |
| C | 3.229926  | -0.683142 | 1.824936  |
| H | 3.313402  | 0.012780  | 0.992150  |
| H | 3.529059  | -1.677961 | 1.483171  |
| H | 3.903979  | -0.366953 | 2.621817  |
| C | -1.419090 | 2.928453  | -1.276021 |
| H | -1.874266 | 2.576025  | -2.203007 |
| H | -0.338446 | 2.880365  | -1.398051 |
| H | -1.729591 | 3.955801  | -1.073804 |

|    |           |           |           |
|----|-----------|-----------|-----------|
| Cl | 0.031731  | 0.500024  | -2.595317 |
| O  | -1.201192 | -2.509443 | 0.324722  |
| C  | -1.576654 | -1.962909 | -0.835565 |
| H  | -1.372687 | -2.615228 | -1.718640 |
| H  | -0.870891 | -1.106736 | -1.152342 |
| C  | -2.975969 | -1.399860 | -0.899633 |
| C  | -3.930745 | -1.815429 | 0.032653  |
| C  | -3.337314 | -0.466237 | -1.877197 |
| C  | -5.223329 | -1.299412 | -0.002375 |
| H  | -3.648264 | -2.565713 | 0.767981  |
| C  | -4.626612 | 0.056901  | -1.904390 |
| H  | -2.593757 | -0.143342 | -2.603807 |
| C  | -5.572608 | -0.356350 | -0.966963 |
| H  | -5.963877 | -1.643052 | 0.715010  |
| H  | -4.897851 | 0.784060  | -2.665614 |
| H  | -6.581883 | 0.044212  | -0.997416 |

### Fe3-ncp-3

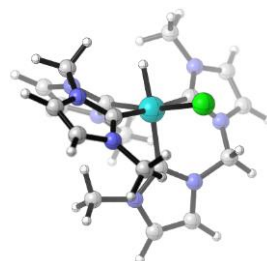

|     |           |           |           |
|-----|-----------|-----------|-----------|
| 1 2 |           |           |           |
| Fe  | 0.030156  | -0.029830 | -0.684091 |
| N   | 1.531241  | 2.301850  | 0.273361  |
| N   | -0.197454 | 2.092724  | 1.521675  |
| N   | 2.896064  | 0.674517  | -0.773429 |
| N   | 2.763619  | -1.457006 | -0.742549 |
| N   | -1.568948 | -1.921436 | 1.016103  |
| N   | 0.189432  | -1.449050 | 2.134627  |
| N   | -2.867604 | -0.601480 | -0.483954 |
| N   | -2.627592 | 1.384558  | -1.235743 |
| C   | 0.413642  | 1.530424  | 0.437093  |
| C   | 0.522097  | 3.175311  | 2.005449  |
| H   | 0.191534  | 3.747080  | 2.857900  |
| C   | 1.615248  | 3.307700  | 1.217280  |
| H   | 2.425735  | 4.018555  | 1.239756  |
| C   | 2.470043  | 2.051170  | -0.800411 |
| H   | 1.971170  | 2.255998  | -1.755272 |
| H   | 3.334207  | 2.706135  | -0.680288 |
| C   | 1.981261  | -0.342720 | -0.738246 |
| C   | 4.201029  | 0.212610  | -0.813361 |
| H   | 5.054460  | 0.869910  | -0.859699 |
| C   | 4.110406  | -1.138593 | -0.798691 |

|    |           |           |           |   |           |           |           |
|----|-----------|-----------|-----------|---|-----------|-----------|-----------|
| H  | 4.877086  | -1.896410 | -0.826237 | N | 1.704141  | 0.242191  | 2.231895  |
| C  | 2.273878  | -2.823702 | -0.705021 | N | 0.551926  | -1.515698 | 2.636476  |
| H  | 1.276162  | -2.829246 | -0.267168 | N | 2.901649  | 0.847585  | 0.285920  |
| H  | 2.954020  | -3.430232 | -0.102766 | N | 3.117662  | -0.148390 | -1.590365 |
| H  | 2.199027  | -3.233806 | -1.713346 | C | 0.678056  | -2.505919 | -0.486078 |
| C  | -1.447526 | 1.660482  | 2.118494  | C | 1.429238  | -4.651439 | -0.547599 |
| H  | -1.302260 | 1.439287  | 3.179268  | H | 2.129347  | -5.456484 | -0.389761 |
| H  | -1.793692 | 0.764403  | 1.607832  | C | 0.191305  | -4.646093 | -1.100526 |
| H  | -2.204905 | 2.442826  | 2.019068  | H | -0.397150 | -5.442107 | -1.528772 |
| C  | -0.404611 | -1.213752 | 0.931250  | C | -1.556271 | -2.875144 | -1.503894 |
| C  | -0.574953 | -2.283760 | 2.931369  | H | -1.424995 | -2.272425 | -2.406791 |
| H  | -0.261248 | -2.588648 | 3.917160  | H | -2.178301 | -3.747548 | -1.708935 |
| C  | -1.690856 | -2.585061 | 2.221545  | C | -1.533362 | -1.047244 | 0.141274  |
| H  | -2.536429 | -3.210428 | 2.460916  | C | -3.423372 | -2.331433 | 0.097750  |
| C  | -2.539763 | -1.946615 | -0.065500 | H | -4.098042 | -3.083013 | -0.280380 |
| H  | -2.111360 | -2.487452 | -0.916436 | C | -3.556471 | -1.434827 | 1.103944  |
| H  | -3.445097 | -2.441655 | 0.288597  | H | -4.377393 | -1.244544 | 1.777168  |
| C  | -1.904255 | 0.307813  | -0.825550 | C | -2.135971 | 0.315303  | 2.155531  |
| C  | -4.146815 | -0.113798 | -0.693894 | H | -1.340037 | 0.979928  | 1.822860  |
| H  | -5.033077 | -0.697511 | -0.503238 | H | -1.845868 | -0.171440 | 3.093569  |
| C  | -3.990664 | 1.144548  | -1.169653 | H | -3.035360 | 0.912120  | 2.318697  |
| H  | -4.718999 | 1.880422  | -1.470435 | C | 2.934307  | -2.958726 | 0.491674  |
| C  | 1.464043  | -0.895859 | 2.552790  | H | 3.053944  | -3.525947 | 1.418663  |
| H  | 1.831214  | -0.237535 | 1.766218  | H | 2.886941  | -1.895730 | 0.723280  |
| H  | 2.189934  | -1.695778 | 2.719998  | H | 3.795741  | -3.148204 | -0.154087 |
| H  | 1.344304  | -0.324695 | 3.477285  | C | 0.815032  | -0.612041 | 1.638950  |
| C  | -2.046927 | 2.618594  | -1.731437 | C | 1.245835  | -1.210414 | 3.796915  |
| H  | -2.850268 | 3.313506  | -1.975723 | H | 1.152824  | -1.806368 | 4.690901  |
| H  | -1.450453 | 2.419787  | -2.623194 | C | 1.979620  | -0.102206 | 3.540568  |
| H  | -1.399905 | 3.069132  | -0.974186 | H | 2.651282  | 0.467473  | 4.162718  |
| H  | 0.230518  | 1.089312  | -1.715933 | C | 2.293806  | 1.340473  | 1.498262  |
| Cl | -0.248159 | -1.607581 | -2.339729 | H | 1.518906  | 2.072836  | 1.250498  |

### Fe3-ncp-TS2-o

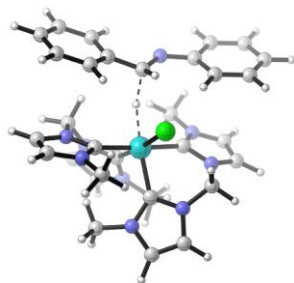

|     |           |           |           |    |           |           |           |
|-----|-----------|-----------|-----------|----|-----------|-----------|-----------|
| 1 2 |           |           |           |    |           |           |           |
| Fe  | 0.331118  | -0.540458 | -0.270322 | C  | 2.202308  | 0.073646  | -0.602390 |
| N   | -0.250863 | -3.338409 | -1.047664 | C  | 4.185746  | 1.122201  | -0.141231 |
| N   | 1.705564  | -3.346789 | -0.175910 | H  | 4.865125  | 1.746768  | 0.416784  |
| N   | -2.186970 | -2.079647 | -0.474130 | C  | 4.318828  | 0.490401  | -1.331960 |
| N   | -2.397719 | -0.678079 | 1.129019  | H  | 5.152781  | 0.435617  | -2.013565 |
|     |           |           |           | C  | -0.338093 | -2.660154 | 2.569847  |
|     |           |           |           | H  | -0.612443 | -2.853238 | 1.536218  |
|     |           |           |           | H  | -1.248469 | -2.477104 | 3.148996  |
|     |           |           |           | H  | 0.166991  | -3.539891 | 2.976261  |
|     |           |           |           | C  | 2.920570  | -0.976388 | -2.768926 |
|     |           |           |           | H  | 2.563551  | -0.378719 | -3.608899 |
|     |           |           |           | H  | 2.167920  | -1.734336 | -2.556175 |
|     |           |           |           | H  | 3.870241  | -1.450972 | -3.025420 |
|     |           |           |           | Cl | -0.143959 | -0.243690 | -2.540684 |

|   |           |          |           |
|---|-----------|----------|-----------|
| C | -0.758010 | 2.356332 | -0.527506 |
| H | -0.201102 | 1.137640 | 0.021340  |
| N | -1.872227 | 2.650441 | 0.161842  |
| H | -0.828511 | 1.949422 | -1.542710 |
| C | 0.394257  | 3.286025 | -0.374962 |
| C | 0.438374  | 4.246076 | 0.642611  |
| C | 1.463455  | 3.187161 | -1.272893 |
| C | 1.548858  | 5.073830 | 0.773661  |
| H | -0.415257 | 4.331272 | 1.308950  |
| C | 2.570670  | 4.020293 | -1.143030 |
| H | 1.414691  | 2.441850 | -2.067623 |
| C | 2.621053  | 4.957889 | -0.112299 |
| H | 1.574876  | 5.823119 | 1.560128  |
| H | 3.392929  | 3.941762 | -1.849424 |
| H | 3.481956  | 5.613181 | -0.013454 |
| C | -3.075047 | 2.116854 | -0.232570 |
| C | -3.282012 | 1.221236 | -1.312814 |
| C | -4.202622 | 2.497687 | 0.533890  |
| C | -4.552366 | 0.740002 | -1.589655 |
| H | -2.443562 | 0.891442 | -1.921580 |
| C | -5.469213 | 2.016026 | 0.241885  |
| H | -4.037570 | 3.194568 | 1.351804  |
| C | -5.653184 | 1.131172 | -0.822289 |
| H | -4.691347 | 0.055504 | -2.423487 |
| H | -6.319737 | 2.334995 | 0.837900  |
| H | -6.645133 | 0.757208 | -1.058275 |

|   |           |           |           |
|---|-----------|-----------|-----------|
| C | -2.812859 | -3.207897 | 1.799018  |
| H | -2.992071 | -3.813317 | 2.672802  |
| C | -3.487605 | -3.108238 | 0.633337  |
| H | -4.374464 | -3.604747 | 0.273712  |
| C | -3.200968 | -1.802933 | -1.452591 |
| H | -2.522582 | -2.265456 | -2.177534 |
| H | -4.224453 | -2.151522 | -1.607936 |
| C | -2.075327 | 0.423149  | -1.420975 |
| C | -4.066675 | 0.199488  | -2.547401 |
| H | -4.972357 | -0.297171 | -2.856962 |
| C | -3.536460 | 1.388105  | -2.893994 |
| H | -3.892089 | 2.160467  | -3.556718 |
| C | -1.445531 | 2.611636  | -2.554392 |
| H | -1.627410 | 3.488490  | -1.930454 |
| H | -1.621031 | 2.875188  | -3.597898 |
| H | -0.415190 | 2.293080  | -2.441082 |
| C | -0.832852 | -2.195505 | 2.847255  |
| H | -1.334080 | -2.572249 | 3.739106  |
| H | -0.576135 | -1.152147 | 3.009902  |
| H | 0.084097  | -2.770203 | 2.693610  |
| C | -0.854967 | 0.733852  | 1.417137  |
| C | -1.802605 | 1.758152  | 3.223484  |
| H | -2.608763 | 2.163622  | 3.813613  |
| C | -0.472501 | 1.696642  | 3.461307  |
| H | 0.119893  | 2.039028  | 4.294560  |
| C | 1.492755  | 0.790524  | 2.211595  |
| H | 1.935859  | 1.496149  | 1.501067  |
| H | 1.975449  | 0.922906  | 3.182016  |
| C | 1.033040  | -1.144837 | 0.734846  |
| C | 2.655878  | -1.410601 | 2.323484  |
| H | 3.304554  | -1.111561 | 3.131523  |
| C | 2.572430  | -2.563193 | 1.618784  |
| H | 3.135187  | -3.480164 | 1.690896  |
| C | -3.329561 | 1.092743  | 1.374519  |
| H | -3.539936 | 0.080613  | 1.026585  |
| H | -3.385550 | 1.770545  | 0.516815  |
| H | -4.080678 | 1.384996  | 2.108323  |
| C | 1.190325  | -3.471165 | -0.222331 |
| H | 1.669448  | -3.348365 | -1.194830 |
| H | 0.112210  | -3.454743 | -0.376122 |
| H | 1.493788  | -4.414867 | 0.234445  |
| C | 1.761430  | 0.827594  | -1.916857 |
| H | 2.173265  | 1.747894  | -2.352109 |
| N | 0.805675  | 1.183570  | -0.853484 |
| C | 2.900508  | -0.096685 | -1.556544 |
| C | 3.165029  | -1.202075 | -2.372732 |
| C | 3.760394  | 0.149507  | -0.480205 |

### Fe3-ncp-4

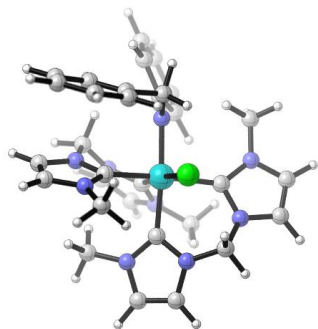

|     |           |           |           |
|-----|-----------|-----------|-----------|
| 1 2 |           |           |           |
| Fe  | -0.483413 | -0.219524 | -0.230477 |
| N   | -2.801034 | -2.176608 | -0.121108 |
| N   | -1.744744 | -2.330405 | 1.723880  |
| N   | -3.178233 | -0.371022 | -1.651261 |
| N   | -2.331770 | 1.508337  | -2.216814 |
| N   | 0.082619  | 1.061254  | 2.364210  |
| N   | -2.022225 | 1.155142  | 1.995932  |
| N   | 1.711172  | -0.567179 | 1.773558  |
| N   | 1.579019  | -2.391146 | 0.672380  |
| C   | -1.701339 | -1.677020 | 0.515176  |

|    |           |           |           |
|----|-----------|-----------|-----------|
| C  | 4.256146  | -2.031105 | -2.125628 |
| H  | 2.494946  | -1.412311 | -3.202207 |
| C  | 4.850978  | -0.678763 | -0.228270 |
| H  | 3.580248  | 1.003566  | 0.170477  |
| C  | 5.104309  | -1.773072 | -1.051405 |
| H  | 4.446124  | -2.878896 | -2.778441 |
| H  | 5.508437  | -0.463944 | 0.610605  |
| H  | 5.959959  | -2.414618 | -0.861001 |
| C  | 0.935718  | 2.486330  | -0.378248 |
| C  | 2.157228  | 3.208962  | -0.419054 |
| C  | -0.169858 | 3.168969  | 0.184847  |
| C  | 2.267532  | 4.479714  | 0.131433  |
| H  | 3.040503  | 2.758147  | -0.858520 |
| C  | -0.052533 | 4.436718  | 0.732064  |
| H  | -1.141061 | 2.688444  | 0.142760  |
| C  | 1.173110  | 5.103170  | 0.726526  |
| H  | 3.227743  | 4.986498  | 0.094299  |
| H  | -0.934000 | 4.919109  | 1.147385  |
| H  | 1.266092  | 6.096330  | 1.153742  |
| H  | 1.185058  | 0.343254  | -2.710396 |
| Cl | -0.189213 | -1.562412 | -2.259400 |

#### Fe-4coor-1

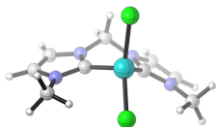

|     |           |           |           |
|-----|-----------|-----------|-----------|
| 0 1 |           |           |           |
| Fe  | 0.000095  | -0.892067 | 0.534644  |
| N   | 1.183072  | 1.607542  | -0.168153 |
| N   | 2.586796  | 0.033989  | -0.574821 |
| N   | -1.183576 | 1.607432  | -0.167599 |
| N   | -2.586976 | 0.033650  | -0.574541 |
| C   | 1.322517  | 0.245121  | -0.101801 |
| C   | 3.208797  | 1.227606  | -0.900895 |
| H   | 4.212891  | 1.257985  | -1.292399 |
| C   | 2.324199  | 2.222312  | -0.650216 |
| H   | 2.399172  | 3.290442  | -0.777301 |
| C   | -0.000185 | 2.259914  | 0.342575  |
| H   | 0.000095  | 2.196868  | 1.437291  |
| H   | -0.000268 | 3.305206  | 0.025904  |
| C   | -1.322703 | 0.244957  | -0.101534 |
| C   | -2.324810 | 2.222017  | -0.649609 |
| H   | -2.400084 | 3.290172  | -0.776303 |
| C   | -3.209161 | 1.227165  | -0.900564 |
| H   | -4.213274 | 1.257366  | -1.292038 |
| C   | 3.232347  | -1.262566 | -0.647700 |

|    |           |           |           |
|----|-----------|-----------|-----------|
| H  | 2.462399  | -2.033925 | -0.701405 |
| H  | 3.864346  | -1.427843 | 0.229681  |
| H  | 3.847315  | -1.313302 | -1.548011 |
| C  | -3.232143 | -1.263028 | -0.648021 |
| H  | -3.866628 | -1.427538 | 0.227704  |
| H  | -2.461940 | -2.034319 | -0.698827 |
| H  | -3.844504 | -1.314882 | -1.550065 |
| Cl | 0.000362  | -0.247178 | 2.683370  |
| Cl | 0.000205  | -2.551161 | -0.991757 |

#### Fe-4coor-2

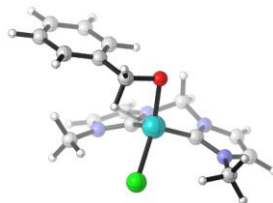

|     |           |           |           |
|-----|-----------|-----------|-----------|
| 0 1 |           |           |           |
| Fe  | -0.726092 | 0.866538  | 0.163450  |
| N   | -2.237206 | -1.553170 | 0.464742  |
| N   | -3.576628 | 0.123434  | 0.506267  |
| N   | -0.142087 | -1.827334 | -0.594985 |
| N   | 1.042909  | -0.480225 | -1.778772 |
| C   | -2.246128 | -0.181058 | 0.392472  |
| C   | -4.347875 | -1.016427 | 0.659917  |
| H   | -5.420500 | -0.969584 | 0.759996  |
| C   | -3.507279 | -2.078039 | 0.629038  |
| H   | -3.695290 | -3.137787 | 0.696173  |
| C   | -0.991674 | -2.276373 | 0.480341  |
| H   | -0.486503 | -2.103085 | 1.441086  |
| H   | -1.189830 | -3.344485 | 0.363510  |
| C   | 0.083091  | -0.485636 | -0.801702 |
| C   | 0.675263  | -2.618647 | -1.383394 |
| H   | 0.637859  | -3.696239 | -1.360935 |
| C   | 1.420542  | -1.764943 | -2.125611 |
| H   | 2.169687  | -1.954718 | -2.877638 |
| C   | -4.104844 | 1.472792  | 0.533808  |
| H   | -3.409747 | 2.128591  | 0.005412  |
| H   | -4.235126 | 1.817377  | 1.564323  |
| H   | -5.069782 | 1.497055  | 0.023967  |
| C   | 1.668942  | 0.718186  | -2.300054 |
| H   | 2.621525  | 0.902608  | -1.791124 |
| H   | 0.988863  | 1.558794  | -2.143687 |
| H   | 1.846342  | 0.601885  | -3.371187 |
| Cl  | -1.397333 | 2.283575  | -1.514928 |
| O   | 0.085480  | 0.749573  | 1.856308  |
| C   | 1.129959  | 1.495824  | 1.371456  |

|   |          |           |          |
|---|----------|-----------|----------|
| H | 0.860999 | 1.946693  | 0.343032 |
| H | 1.306381 | 2.413247  | 1.963541 |
| C | 2.431698 | 0.756873  | 1.151210 |
| C | 3.579489 | 1.447542  | 0.753149 |
| C | 2.494061 | -0.626901 | 1.302519 |
| C | 4.762370 | 0.763837  | 0.488656 |
| H | 3.538998 | 2.530696  | 0.640892 |
| C | 3.674244 | -1.315409 | 1.034509 |
| H | 1.595257 | -1.142383 | 1.631458 |
| C | 4.810260 | -0.623425 | 0.621262 |
| H | 5.648203 | 1.312037  | 0.178332 |
| H | 3.708264 | -2.396491 | 1.147972 |
| H | 5.731984 | -1.159682 | 0.412291 |

### Fe-4coor-TS2

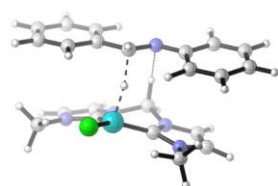

0 1

|    |           |           |           |
|----|-----------|-----------|-----------|
| Fe | 0.322404  | -1.485375 | -0.404964 |
| N  | -1.217314 | -0.476742 | 1.853234  |
| N  | -2.372248 | -1.818057 | 0.632470  |
| N  | 1.125849  | -0.141890 | 2.053685  |
| N  | 2.801907  | -1.044894 | 1.054374  |
| C  | -1.111028 | -1.280957 | 0.741761  |
| C  | -3.225761 | -1.317704 | 1.597293  |
| H  | -4.262653 | -1.608596 | 1.653209  |
| C  | -2.502521 | -0.468678 | 2.365702  |
| H  | -2.782884 | 0.129988  | 3.217873  |
| C  | -0.178804 | 0.449970  | 2.239803  |
| H  | -0.264336 | 1.363737  | 1.628529  |
| H  | -0.304522 | 0.700966  | 3.297586  |
| C  | 1.439406  | -0.892304 | 0.943742  |
| C  | 2.247790  | 0.183453  | 2.794645  |
| H  | 2.197834  | 0.787498  | 3.686868  |
| C  | 3.300415  | -0.394654 | 2.167424  |
| H  | 4.350246  | -0.403181 | 2.414052  |
| C  | -2.776475 | -2.699633 | -0.439508 |
| H  | -3.151929 | -3.647545 | -0.044769 |
| H  | -1.908219 | -2.892768 | -1.076107 |
| H  | -3.556284 | -2.224269 | -1.042752 |
| C  | 3.605318  | -1.794814 | 0.113298  |
| H  | 4.477762  | -1.206369 | -0.180895 |
| H  | 2.999891  | -1.998291 | -0.774929 |
| H  | 3.933998  | -2.744741 | 0.545560  |

|    |           |           |           |
|----|-----------|-----------|-----------|
| Cl | 0.652518  | -2.543020 | -2.319824 |
| C  | 0.105234  | 1.437699  | -1.209546 |
| H  | -0.179233 | 1.103967  | -2.222062 |
| H  | 0.083328  | 0.009201  | -0.760279 |
| C  | 1.556396  | 1.697953  | -1.050265 |
| C  | 2.038610  | 2.586047  | -0.085011 |
| C  | 2.466335  | 1.007259  | -1.859878 |
| C  | 3.407781  | 2.782210  | 0.065411  |
| H  | 1.318771  | 3.122786  | 0.527462  |
| C  | 3.834006  | 1.207684  | -1.711423 |
| H  | 2.087101  | 0.293158  | -2.590592 |
| C  | 4.309551  | 2.093684  | -0.744725 |
| H  | 3.774654  | 3.479278  | 0.814746  |
| H  | 4.531047  | 0.668712  | -2.348408 |
| H  | 5.378610  | 2.252899  | -0.628978 |
| N  | -0.754752 | 2.078821  | -0.437813 |
| C  | -2.105326 | 1.839213  | -0.605944 |
| C  | -2.655665 | 0.803432  | -1.394963 |
| C  | -2.997693 | 2.655831  | 0.119823  |
| C  | -4.032855 | 0.623411  | -1.461635 |
| H  | -2.000478 | 0.123899  | -1.936542 |
| C  | -4.369477 | 2.471155  | 0.041900  |
| H  | -2.570489 | 3.445891  | 0.732845  |
| C  | -4.899923 | 1.452544  | -0.751573 |
| H  | -4.435642 | -0.173517 | -2.084401 |
| H  | -5.033303 | 3.124394  | 0.602958  |
| H  | -5.974555 | 1.306505  | -0.814555 |

### Fe-6coor-1a

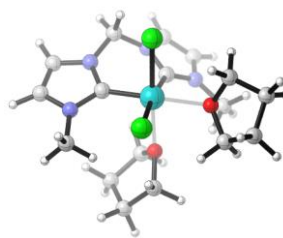

0 1

|    |           |           |           |
|----|-----------|-----------|-----------|
| Fe | -0.151852 | 0.001782  | -0.479341 |
| N  | 1.020131  | 2.506207  | 0.471876  |
| N  | -0.623088 | 2.005536  | 1.747223  |
| N  | 2.520054  | 1.118726  | -0.737546 |
| N  | 2.665078  | -1.005826 | -0.957662 |
| C  | 0.049531  | 1.549977  | 0.638083  |
| C  | -0.102060 | 3.201254  | 2.214589  |
| H  | -0.513127 | 3.708754  | 3.072901  |
| C  | 0.938831  | 3.518221  | 1.409136  |
| H  | 1.614121  | 4.359235  | 1.416232  |
| C  | 1.973982  | 2.450790  | -0.612999 |

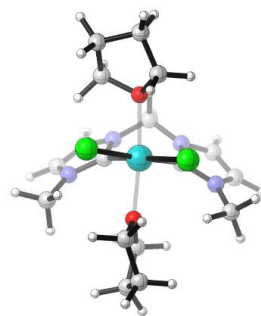

|    |           |           |           |
|----|-----------|-----------|-----------|
| H  | 1.468649  | 2.720736  | -1.546957 |
| H  | 2.792058  | 3.141939  | -0.392438 |
| C  | 1.738295  | -0.015557 | -0.749151 |
| C  | 3.855989  | 0.844870  | -0.959650 |
| H  | 4.607595  | 1.617466  | -0.998243 |
| C  | 3.945018  | -0.497892 | -1.099600 |
| H  | 4.794401  | -1.136704 | -1.282687 |
| C  | -1.723592 | 1.324395  | 2.396552  |
| H  | -1.602781 | 0.249003  | 2.269062  |
| H  | -2.684925 | 1.616019  | 1.964883  |
| H  | -1.713365 | 1.571328  | 3.461150  |
| C  | 2.378771  | -2.420513 | -1.092198 |
| H  | 2.219273  | -2.686190 | -2.139146 |
| H  | 1.456289  | -2.652099 | -0.564308 |
| H  | 3.216931  | -2.992180 | -0.681375 |
| Cl | -0.681889 | -1.915099 | -1.798107 |
| Cl | -0.400875 | 1.407436  | -2.348300 |
| O  | 0.008569  | -1.274225 | 1.315138  |
| C  | -0.272662 | -2.683844 | 1.464666  |
| C  | 0.972593  | -0.934655 | 2.320911  |
| C  | 0.968238  | -3.310813 | 2.112817  |
| H  | -1.160294 | -2.790656 | 2.104617  |
| H  | -0.505876 | -3.051688 | 0.460475  |
| C  | 1.906585  | -2.125943 | 2.372066  |
| H  | 1.444936  | 0.001712  | 2.015912  |
| H  | 0.454463  | -0.780331 | 3.282862  |
| H  | 1.430608  | -4.060339 | 1.464838  |
| H  | 0.701893  | -3.815155 | 3.046177  |
| H  | 2.653907  | -2.034519 | 1.577734  |
| H  | 2.440062  | -2.202024 | 3.322837  |
| O  | -2.312461 | 0.048350  | -0.116618 |
| C  | -2.999981 | -1.132880 | 0.346994  |
| C  | -3.155733 | 0.741278  | -1.069245 |
| C  | -4.337599 | -1.154092 | -0.372056 |
| H  | -2.381948 | -2.002503 | 0.113383  |
| H  | -3.117404 | -1.039849 | 1.439275  |
| C  | -4.557996 | 0.317359  | -0.698528 |
| H  | -2.934648 | 1.807230  | -0.973144 |
| H  | -2.876014 | 0.424440  | -2.080307 |
| H  | -5.132341 | -1.601356 | 0.230602  |
| H  | -4.244161 | -1.730652 | -1.298466 |
| H  | -4.914307 | 0.862879  | 0.185022  |
| H  | -5.272210 | 0.482241  | -1.508830 |

**Fe-6coor-1b**

|     |           |           |           |
|-----|-----------|-----------|-----------|
| O 1 |           |           |           |
| Fe  | -0.086789 | 0.199182  | -0.394547 |
| N   | -0.290141 | -2.490602 | 0.712298  |
| N   | 1.297772  | -2.508178 | -0.721347 |
| N   | -0.894763 | -0.769084 | 2.225874  |
| N   | -0.012046 | 1.165608  | 2.493107  |
| C   | 0.355024  | -1.669470 | -0.184862 |
| C   | 1.219317  | -3.783342 | -0.188761 |
| H   | 1.878770  | -4.574820 | -0.508145 |
| C   | 0.220484  | -3.776438 | 0.724308  |
| H   | -0.173984 | -4.554861 | 1.358263  |
| C   | -1.325272 | -1.991669 | 1.584660  |
| H   | -2.235385 | -1.812400 | 1.004846  |
| H   | -1.528586 | -2.738532 | 2.355613  |
| C   | -0.329680 | 0.264732  | 1.510680  |
| C   | -0.925967 | -0.516295 | 3.586480  |
| H   | -1.347869 | -1.208454 | 4.298260  |
| C   | -0.368183 | 0.706641  | 3.750443  |
| H   | -0.198103 | 1.291499  | 4.640627  |
| C   | 2.304077  | -2.147136 | -1.703725 |
| H   | 2.350554  | -1.062571 | -1.775951 |
| H   | 2.030630  | -2.524289 | -2.691124 |
| H   | 3.266677  | -2.569259 | -1.395856 |
| C   | 0.685536  | 2.418711  | 2.272857  |
| H   | 0.221747  | 3.204009  | 2.873742  |
| H   | 0.591412  | 2.678417  | 1.215373  |
| H   | 1.738744  | 2.326777  | 2.563935  |
| Cl  | -0.733802 | 2.503704  | -0.735656 |
| Cl  | 0.288330  | 0.005130  | -2.770015 |
| O   | 1.882041  | 0.809915  | -0.214313 |
| C   | 2.449955  | 1.878898  | -1.013728 |
| C   | 2.853384  | 0.276174  | 0.694486  |
| C   | 3.937133  | 1.617506  | -0.938940 |
| H   | 1.986197  | 1.800466  | -1.999553 |
| H   | 2.165881  | 2.838749  | -0.562328 |
| C   | 4.098151  | 1.127508  | 0.498019  |
| H   | 2.444616  | 0.308378  | 1.712759  |
| H   | 3.025556  | -0.778891 | 0.439117  |
| H   | 4.533324  | 2.505498  | -1.160948 |



|   |           |           |           |
|---|-----------|-----------|-----------|
| H | 4.222718  | 0.831630  | -1.648485 |
| H | 4.090733  | 1.980733  | 1.186546  |
| H | 5.018863  | 0.566102  | 0.675011  |
| O | -2.178613 | -0.179070 | -0.597421 |
| C | -2.703588 | -0.104639 | -1.958457 |
| C | -3.069823 | 0.576393  | 0.276330  |
| C | -4.181443 | 0.133952  | -1.769456 |
| H | -2.209703 | 0.730923  | -2.465102 |
| H | -2.417222 | -1.032824 | -2.454924 |
| C | -4.164276 | 1.127177  | -0.614793 |
| H | -3.461827 | -0.130509 | 1.024914  |
| H | -2.486539 | 1.357299  | 0.769177  |
| H | -4.702532 | -0.789565 | -1.486472 |
| H | -4.653044 | 0.527462  | -2.673131 |
| H | -5.119653 | 1.221314  | -0.091879 |
| H | -3.864568 | 2.115607  | -0.978551 |

### Fe-6coor-1c

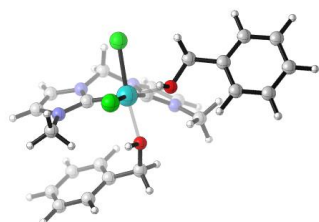

|     |           |           |           |
|-----|-----------|-----------|-----------|
| O 1 |           |           |           |
| Fe  | 0.014318  | -0.076325 | 0.724380  |
| N   | 0.527360  | -2.303325 | -1.074510 |
| N   | -0.882527 | -0.981977 | -1.999820 |
| N   | 2.275101  | -1.881416 | 0.476641  |
| N   | 2.967728  | -0.115550 | 1.466434  |
| C   | -0.161044 | -1.140404 | -0.840133 |
| C   | -0.652232 | -2.015380 | -2.894382 |
| H   | -1.140369 | -2.060477 | -3.854953 |
| C   | 0.241695  | -2.849362 | -2.311219 |
| H   | 0.688397  | -3.768073 | -2.657611 |
| C   | 1.391142  | -2.883245 | -0.072351 |
| H   | 0.774269  | -3.296438 | 0.734083  |
| H   | 1.995403  | -3.664782 | -0.540846 |
| C   | 1.839939  | -0.644171 | 0.895913  |
| C   | 3.596705  | -2.117495 | 0.803928  |
| H   | 4.097025  | -3.042874 | 0.566096  |
| C   | 4.030838  | -0.997708 | 1.426659  |
| H   | 4.998644  | -0.738670 | 1.825828  |
| C   | -1.817502 | 0.096615  | -2.254978 |
| H   | -1.670950 | 0.871626  | -1.503552 |
| H   | -2.851186 | -0.258795 | -2.190402 |
| H   | -1.648928 | 0.506270  | -3.255071 |

|    |           |           |           |
|----|-----------|-----------|-----------|
| C  | 3.072864  | 1.191095  | 2.085110  |
| H  | 2.641639  | 1.183507  | 3.087196  |
| H  | 2.526027  | 1.924620  | 1.494684  |
| H  | 4.127593  | 1.472436  | 2.119527  |
| Cl | -0.038594 | 1.632902  | 2.504438  |
| Cl | -0.622451 | -1.827207 | 2.146961  |
| O  | 0.235933  | 1.715679  | -0.356953 |
| C  | 0.983679  | 2.022451  | -1.542206 |
| H  | 0.529836  | 1.403801  | -2.323271 |
| H  | 0.798312  | 3.073669  | -1.797147 |
| O  | -2.037240 | 0.556025  | 0.720327  |
| C  | -3.102299 | -0.389853 | 0.793469  |
| H  | -2.785356 | -1.251316 | 0.190149  |
| H  | -3.191396 | -0.779422 | 1.813808  |
| H  | -1.950108 | 1.042250  | 1.565374  |
| H  | 0.433384  | 2.313600  | 0.392328  |
| C  | -4.404933 | 0.167553  | 0.288775  |
| C  | -5.548411 | -0.637537 | 0.330281  |
| C  | -4.507928 | 1.455424  | -0.238790 |
| C  | -6.766246 | -0.166635 | -0.146042 |
| H  | -5.478643 | -1.641903 | 0.744642  |
| C  | -5.729525 | 1.929167  | -0.713951 |
| H  | -3.621862 | 2.083480  | -0.268303 |
| C  | -6.861367 | 1.121293  | -0.671301 |
| H  | -7.645374 | -0.804192 | -0.104141 |
| H  | -5.795550 | 2.936456  | -1.117205 |
| H  | -7.813419 | 1.491974  | -1.040769 |
| C  | 2.454029  | 1.747184  | -1.460329 |
| C  | 2.956006  | 0.491747  | -1.817510 |
| C  | 3.342990  | 2.734603  | -1.029859 |
| C  | 4.317779  | 0.224997  | -1.733363 |
| H  | 2.262867  | -0.278438 | -2.153979 |
| C  | 4.707622  | 2.470786  | -0.941859 |
| H  | 2.960175  | 3.718604  | -0.762262 |
| C  | 5.195400  | 1.214503  | -1.291883 |
| H  | 4.696450  | -0.755716 | -2.008127 |
| H  | 5.389896  | 3.247273  | -0.607137 |
| H  | 6.260340  | 1.007644  | -1.228646 |

### Fe-6coor-1d

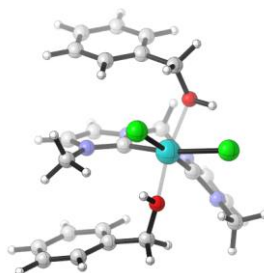

O 1  
 Fe 0.039575 -1.047563 -0.677382  
 N -0.123129 -1.418538 2.199542  
 N 1.419287 -2.708189 1.462230  
 N -0.807612 0.727471 1.458630  
 N -0.066397 1.977764 -0.108795  
 C 0.493911 -1.794914 1.031808  
 C 1.364604 -2.886617 2.834163  
 H 2.016398 -3.577131 3.345528  
 C 0.392827 -2.069505 3.305386  
 H 0.023214 -1.902833 4.304893  
 C -1.190417 -0.445247 2.207946  
 H -2.092687 -0.883355 1.771031  
 H -1.391521 -0.150147 3.240525  
 C -0.257896 0.656418 0.195545  
 C -0.954252 2.026519 1.904509  
 H -1.396760 2.266186 2.858606  
 C -0.484771 2.813328 0.909146  
 H -0.404756 3.886348 0.831339  
 C 2.318603 -3.465012 0.609729  
 H 2.246520 -3.080916 -0.406320  
 H 2.018732 -4.514921 0.584941  
 H 3.340948 -3.385674 0.993655  
 C 0.544051 2.505043 -1.311360  
 H -0.218053 2.913931 -1.981430  
 H 1.046798 1.701045 -1.840536  
 H 1.259962 3.284239 -1.033568  
 Cl -0.353244 -0.152354 -2.886192  
 O -1.947156 -1.691315 -0.370445  
 C -3.029224 -1.168961 -1.178988  
 H -2.675643 -1.027051 -2.205310  
 H -3.829450 -1.920253 -1.169299  
 C -3.510873 0.114213 -0.580413  
 C -3.120231 1.341043 -1.123692  
 C -4.344750 0.102465 0.542556  
 C -3.562121 2.532929 -0.554940  
 H -2.453109 1.336921 -1.984949  
 C -4.782938 1.293608 1.115070  
 H -4.659691 -0.853604 0.959321  
 C -4.394007 2.512592 0.562497  
 H -3.254355 3.483056 -0.986199  
 H -5.440549 1.271927 1.980381  
 H -4.742485 3.444380 1.000644  
 H -1.673576 -2.557625 -0.766308  
 O 1.991682 -0.817852 -1.315280  
 C 3.231300 -0.448384 -0.703216  
 H 3.322258 -1.117378 0.157555

H 4.040593 -0.693239 -1.402462  
 H 1.850484 -0.428341 -2.199441  
 C 3.339918 0.976531 -0.249448  
 C 2.806164 1.364311 0.983226  
 C 3.995301 1.929849 -1.033274  
 C 2.912446 2.681889 1.416952  
 H 2.296034 0.621007 1.596310  
 C 4.111033 3.247832 -0.600010  
 H 4.424342 1.630838 -1.988186  
 C 3.566485 3.625812 0.625747  
 H 2.488953 2.971813 2.374848  
 H 4.629126 3.978117 -1.215131  
 H 3.660136 4.652497 0.969088  
 Cl 0.033065 -3.304345 -1.656554

**Fe-6coor-2-1**

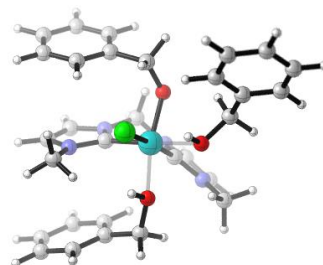

O 1  
 Fe -0.277901 -0.420612 -0.099148  
 N 0.818832 -0.616130 2.564367  
 N -0.125566 -2.483456 2.102333  
 N 1.934256 0.929656 1.156955  
 N 2.325807 0.920767 -0.946751  
 C 0.122570 -1.243926 1.563599  
 C 0.393548 -2.600955 3.383065  
 H 0.288666 -3.503607 3.963960  
 C 0.993934 -1.421370 3.673156  
 H 1.514123 -1.088016 4.557581  
 C 1.260889 0.754454 2.421506  
 H 0.386680 1.411524 2.454873  
 H 1.962117 0.984842 3.228253  
 C 1.395130 0.493980 -0.032924  
 C 3.117532 1.620525 0.983383  
 H 3.656481 2.063691 1.805874  
 C 3.359566 1.615576 -0.347374  
 H 4.170417 2.035075 -0.921789  
 C -0.881386 -3.530820 1.448092  
 H -1.129881 -3.200301 0.439601  
 H -1.809434 -3.729906 1.993088  
 H -0.297707 -4.456298 1.410997  
 C 2.231486 0.768692 -2.381220

|    |           |           |           |
|----|-----------|-----------|-----------|
| H  | 1.647997  | 1.581443  | -2.823664 |
| H  | 1.728191  | -0.166276 | -2.619274 |
| H  | 3.239999  | 0.753021  | -2.801205 |
| Cl | -0.959152 | 0.271577  | -2.378538 |
| O  | 0.255414  | -2.128694 | -1.276320 |
| C  | 1.318053  | -3.086655 | -1.184044 |
| H  | 1.116890  | -3.634422 | -0.257946 |
| H  | 1.218107  | -3.794798 | -2.016499 |
| O  | -2.226376 | -1.375221 | -0.267148 |
| C  | -3.272112 | -1.025128 | 0.663518  |
| H  | -3.443685 | -1.909563 | 1.290320  |
| H  | -2.870073 | -0.211128 | 1.284432  |
| H  | -2.412523 | -0.970531 | -1.135696 |
| H  | 0.179662  | -1.734327 | -2.164938 |
| C  | -4.541073 | -0.609796 | -0.011554 |
| C  | -5.767579 | -1.162070 | 0.364228  |
| C  | -4.519893 | 0.371706  | -1.010349 |
| C  | -6.951602 | -0.740895 | -0.234853 |
| H  | -5.790988 | -1.930653 | 1.134866  |
| C  | -5.700946 | 0.782151  | -1.619151 |
| H  | -3.569558 | 0.809648  | -1.316423 |
| C  | -6.920663 | 0.231244  | -1.230897 |
| H  | -7.897865 | -1.180554 | 0.069350  |
| H  | -5.667964 | 1.540701  | -2.396327 |
| H  | -7.842545 | 0.556313  | -1.705326 |
| C  | 2.702398  | -2.512760 | -1.142817 |
| C  | 3.247003  | -2.074755 | 0.069024  |
| C  | 3.472019  | -2.417410 | -2.303851 |
| C  | 4.528782  | -1.539141 | 0.115000  |
| H  | 2.648694  | -2.149768 | 0.975845  |
| C  | 4.757130  | -1.881362 | -2.262279 |
| H  | 3.058719  | -2.768420 | -3.248512 |
| C  | 5.285202  | -1.439323 | -1.052281 |
| H  | 4.938585  | -1.195040 | 1.060706  |
| H  | 5.347483  | -1.815626 | -3.172178 |
| H  | 6.288813  | -1.024106 | -1.015955 |
| O  | -1.176472 | 0.973757  | 0.935435  |
| C  | -1.537817 | 2.188916  | 0.360022  |
| H  | -1.911360 | 2.081015  | -0.674381 |
| H  | -2.373999 | 2.613966  | 0.950264  |
| C  | -0.412469 | 3.197302  | 0.345001  |
| C  | -0.033518 | 3.866973  | 1.513880  |
| C  | 0.303953  | 3.453896  | -0.827340 |
| C  | 1.029234  | 4.767101  | 1.515107  |
| H  | -0.599228 | 3.687185  | 2.428492  |
| C  | 1.368224  | 4.353058  | -0.833186 |
| H  | 0.008864  | 2.927533  | -1.735481 |

|   |          |          |           |
|---|----------|----------|-----------|
| C | 1.733102 | 5.014999 | 0.337373  |
| H | 1.298342 | 5.291377 | 2.429651  |
| H | 1.913282 | 4.541707 | -1.756700 |
| H | 2.557696 | 5.723585 | 0.332096  |

### Fe-6coor-2-2

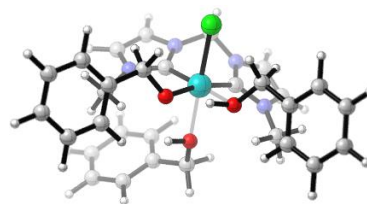

|    |           |           |           |
|----|-----------|-----------|-----------|
| O  | 1         |           |           |
| Fe | 0.279714  | -0.405795 | -0.473627 |
| N  | 0.454876  | -3.232825 | -1.172419 |
| N  | 1.768854  | -2.846940 | 0.474553  |
| N  | -1.568143 | -2.179674 | -1.836468 |
| N  | -2.689762 | -0.531865 | -1.052623 |
| C  | 0.893978  | -2.207360 | -0.371454 |
| C  | 1.870908  | -4.199127 | 0.187536  |
| H  | 2.517912  | -4.857351 | 0.745560  |
| C  | 1.038755  | -4.444780 | -0.852921 |
| H  | 0.818669  | -5.355897 | -1.387021 |
| C  | -0.450506 | -2.987648 | -2.270607 |
| H  | 0.085207  | -2.456132 | -3.065554 |
| H  | -0.831601 | -3.945629 | -2.634475 |
| C  | -1.412759 | -1.028126 | -1.094832 |
| C  | -2.874741 | -2.371505 | -2.245370 |
| H  | -3.173677 | -3.209417 | -2.855581 |
| C  | -3.581908 | -1.332663 | -1.742138 |
| H  | -4.632658 | -1.095656 | -1.799409 |
| C  | 2.527866  | -2.186228 | 1.516966  |
| H  | 2.153383  | -1.168437 | 1.624942  |
| H  | 3.589686  | -2.139294 | 1.255095  |
| H  | 2.422184  | -2.728621 | 2.461416  |
| C  | -3.114544 | 0.627889  | -0.296754 |
| H  | -3.527476 | 1.390915  | -0.963381 |
| H  | -2.243024 | 1.050427  | 0.203085  |
| H  | -3.871098 | 0.336098  | 0.437997  |
| Cl | 0.952675  | -0.138239 | -2.715592 |
| O  | -0.079251 | -0.188324 | 1.569220  |
| C  | -0.667974 | -1.073257 | 2.527424  |
| H  | -0.163127 | -2.030575 | 2.362059  |
| H  | -0.398624 | -0.717748 | 3.531579  |
| O  | 2.107825  | 0.552786  | 0.162472  |
| C  | 3.268709  | 0.596389  | -0.656621 |
| H  | 3.380175  | -0.398205 | -1.109309 |
| H  | 3.111247  | 1.273302  | -1.505384 |

|   |           |           |           |
|---|-----------|-----------|-----------|
| H | 1.542702  | 1.361144  | 0.040556  |
| H | -0.526621 | 0.678880  | 1.503869  |
| C | 4.505020  | 0.965596  | 0.117418  |
| C | 5.723894  | 1.076013  | -0.560470 |
| C | 4.480611  | 1.185126  | 1.494940  |
| C | 6.890785  | 1.397808  | 0.122392  |
| H | 5.752132  | 0.909457  | -1.636123 |
| C | 5.650017  | 1.509228  | 2.180621  |
| H | 3.533372  | 1.104154  | 2.020504  |
| C | 6.858216  | 1.615840  | 1.499135  |
| H | 7.828681  | 1.481932  | -0.420390 |
| H | 5.614692  | 1.681564  | 3.253502  |
| H | 7.769101  | 1.869837  | 2.034222  |
| C | -2.152958 | -1.235381 | 2.414882  |
| C | -2.701745 | -2.230228 | 1.601213  |
| C | -3.011034 | -0.396596 | 3.132708  |
| C | -4.081616 | -2.379728 | 1.501311  |
| H | -2.034357 | -2.880948 | 1.037310  |
| C | -4.391733 | -0.545764 | 3.039774  |
| H | -2.588646 | 0.373617  | 3.776567  |
| C | -4.928506 | -1.538742 | 2.222184  |
| H | -4.495770 | -3.154735 | 0.862189  |
| H | -5.048176 | 0.107930  | 3.606882  |
| H | -6.005783 | -1.661281 | 2.151907  |
| O | -0.149928 | 1.553014  | -0.214198 |
| C | -0.615451 | 2.354478  | -1.244257 |
| H | 0.213382  | 2.730370  | -1.874652 |
| H | -1.235197 | 1.772693  | -1.956819 |
| C | -1.431029 | 3.534680  | -0.768553 |
| C | -1.646421 | 3.780179  | 0.587895  |
| C | -2.011463 | 4.402758  | -1.700696 |
| C | -2.420241 | 4.861874  | 1.005766  |
| H | -1.191757 | 3.106831  | 1.310995  |
| C | -2.783750 | 5.482679  | -1.289461 |
| H | -1.851000 | 4.221664  | -2.762954 |
| C | -2.992899 | 5.717314  | 0.069828  |
| H | -2.574336 | 5.038489  | 2.067970  |
| H | -3.226259 | 6.145026  | -2.029639 |
| H | -3.596199 | 6.561332  | 0.393454  |

**Fe-6coor-TS2-1**

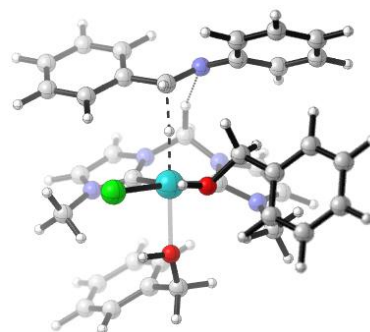

|     |           |           |           |
|-----|-----------|-----------|-----------|
| O 1 |           |           |           |
| Fe  | 0.363399  | -0.459391 | -0.496395 |
| N   | 0.451509  | 0.194762  | 2.330253  |
| N   | -0.843942 | -1.491280 | 2.049264  |
| N   | 2.327110  | 0.957305  | 1.089359  |
| N   | 3.311738  | 0.221701  | -0.664293 |
| C   | -0.059873 | -0.606727 | 1.337188  |
| C   | -0.824811 | -1.218664 | 3.407704  |
| H   | -1.389659 | -1.803266 | 4.116467  |
| C   | -0.004045 | -0.155766 | 3.586046  |
| H   | 0.286071  | 0.376771  | 4.478237  |
| C   | 1.286600  | 1.331207  | 2.019295  |
| H   | 0.655599  | 2.132957  | 1.608893  |
| H   | 1.756456  | 1.682071  | 2.942350  |
| C   | 2.083935  | 0.212227  | -0.046219 |
| C   | 3.620571  | 1.439407  | 1.142037  |
| H   | 3.971139  | 2.070366  | 1.943525  |
| C   | 4.239115  | 0.972954  | 0.033422  |
| H   | 5.251662  | 1.094991  | -0.317556 |
| C   | -1.628157 | -2.561675 | 1.467749  |
| H   | -1.316632 | -2.703543 | 0.433156  |
| H   | -2.696223 | -2.318859 | 1.478495  |
| H   | -1.474476 | -3.485734 | 2.032984  |
| C   | 3.621850  | -0.405986 | -1.929242 |
| H   | 3.326762  | 0.231054  | -2.767292 |
| H   | 3.075780  | -1.343988 | -2.017864 |
| H   | 4.694349  | -0.610607 | -1.965757 |
| Cl  | 0.590071  | -0.543894 | -2.939524 |
| C   | -0.528198 | 2.521368  | -0.561893 |
| H   | -1.120789 | 2.288877  | -1.466798 |
| H   | -0.099929 | 1.114439  | -0.453629 |
| C   | 0.792099  | 3.154045  | -0.859413 |
| C   | 1.295136  | 4.163013  | -0.031598 |
| C   | 1.527266  | 2.770269  | -1.986255 |
| C   | 2.513428  | 4.772493  | -0.320568 |
| H   | 0.699159  | 4.468184  | 0.824797  |
| C   | 2.740997  | 3.384090  | -2.275846 |
| H   | 1.148731  | 1.966719  | -2.616439 |
| C   | 3.240532  | 4.385502  | -1.443544 |

|   |           |           |           |
|---|-----------|-----------|-----------|
| H | 2.889087  | 5.562352  | 0.325641  |
| H | 3.300610  | 3.079569  | -3.157627 |
| H | 4.187752  | 4.866740  | -1.674246 |
| O | 0.733281  | -2.572461 | -0.801792 |
| C | 1.438240  | -3.509321 | 0.025437  |
| H | 0.832360  | -3.579528 | 0.934725  |
| H | 1.419386  | -4.490788 | -0.466242 |
| O | -1.571358 | -1.052972 | -1.140953 |
| C | -2.792401 | -0.434480 | -0.747649 |
| H | -2.664233 | -0.134891 | 0.301608  |
| H | -2.943603 | 0.505360  | -1.298127 |
| H | -1.410375 | -0.936583 | -2.097739 |
| H | 1.094557  | -2.533579 | -1.704970 |
| C | -3.976728 | -1.350372 | -0.902299 |
| C | -5.241058 | -0.901959 | -0.506445 |
| C | -3.845900 | -2.640758 | -1.417775 |
| C | -6.352221 | -1.728120 | -0.630073 |
| H | -5.345296 | 0.102136  | -0.097701 |
| C | -4.961362 | -3.466985 | -1.542168 |
| H | -2.862895 | -2.993839 | -1.717923 |
| C | -6.217147 | -3.014665 | -1.149933 |
| H | -7.328911 | -1.366455 | -0.319044 |
| H | -4.845937 | -4.468500 | -1.948555 |
| H | -7.086371 | -3.659222 | -1.247785 |
| C | 2.841903  | -3.115779 | 0.372174  |
| C | 3.094393  | -2.328403 | 1.500069  |
| C | 3.915168  | -3.524195 | -0.422334 |
| C | 4.392308  | -1.946819 | 1.819412  |
| H | 2.257649  | -2.008852 | 2.119471  |
| C | 5.217096  | -3.142009 | -0.107359 |
| H | 3.727342  | -4.149164 | -1.294608 |
| C | 5.455805  | -2.350887 | 1.013212  |
| H | 4.575899  | -1.328802 | 2.694066  |
| H | 6.044465  | -3.467729 | -0.731911 |
| H | 6.470907  | -2.054465 | 1.263489  |
| N | -1.129436 | 2.866944  | 0.570647  |
| C | -2.490132 | 2.692750  | 0.698114  |
| C | -3.006903 | 2.263916  | 1.938859  |
| C | -3.416558 | 2.986952  | -0.327114 |
| C | -4.373536 | 2.119591  | 2.137945  |
| H | -2.299379 | 2.046489  | 2.736553  |
| C | -4.783245 | 2.854756  | -0.116082 |
| H | -3.046650 | 3.358383  | -1.280321 |
| C | -5.275089 | 2.417733  | 1.114848  |
| H | -4.742416 | 1.780052  | 3.103165  |
| H | -5.475177 | 3.104680  | -0.917466 |
| H | -6.345073 | 2.321788  | 1.277298  |

### Fe-6coor-TS2-2

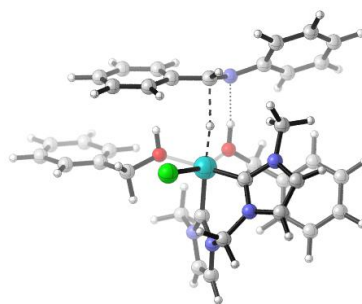

|    |           |           |           |
|----|-----------|-----------|-----------|
| O  | 1         |           |           |
| Fe | 0.045285  | -0.659546 | -0.592179 |
| N  | -0.402086 | -3.555276 | -0.438871 |
| N  | 0.717113  | -2.987490 | 1.293957  |
| N  | -2.001011 | -2.364762 | -1.728673 |
| N  | -2.804602 | -0.393999 | -1.519907 |
| C  | 0.195363  | -2.457969 | 0.133914  |
| C  | 0.438884  | -4.340363 | 1.423424  |
| H  | 0.773180  | -4.919473 | 2.269906  |
| C  | -0.276001 | -4.696970 | 0.328339  |
| H  | -0.684079 | -5.649401 | 0.026840  |
| C  | -1.063253 | -3.460714 | -1.722623 |
| H  | -0.307148 | -3.290891 | -2.497926 |
| H  | -1.605229 | -4.391940 | -1.908031 |
| C  | -1.663230 | -1.110478 | -1.272089 |
| C  | -3.276523 | -2.409088 | -2.262197 |
| H  | -3.704495 | -3.311824 | -2.668927 |
| C  | -3.781748 | -1.160352 | -2.128952 |
| H  | -4.748012 | -0.755899 | -2.386305 |
| C  | -2.934463 | 1.014785  | -1.240030 |
| H  | -2.593711 | 1.621401  | -2.086078 |
| H  | -2.314870 | 1.251510  | -0.377868 |
| H  | -3.975060 | 1.258747  | -1.009251 |
| C  | 1.461681  | -2.226062 | 2.273643  |
| H  | 1.067624  | -2.415004 | 3.277394  |
| H  | 1.365756  | -1.167691 | 2.028341  |
| H  | 2.523620  | -2.495683 | 2.259997  |
| Cl | 1.014415  | -1.174245 | -2.704355 |
| C  | 0.071646  | 2.772555  | -0.766832 |
| H  | -0.459798 | 2.865053  | -1.723125 |
| H  | -0.152966 | 0.877305  | -1.175079 |
| C  | 1.536401  | 2.708073  | -0.867741 |
| C  | 2.339869  | 3.190126  | 0.176172  |
| C  | 2.150316  | 2.177286  | -2.015161 |
| C  | 3.727199  | 3.137274  | 0.077496  |
| H  | 1.849403  | 3.597973  | 1.055381  |
| C  | 3.536464  | 2.122690  | -2.104602 |

|   |           |           |           |
|---|-----------|-----------|-----------|
| H | 1.528530  | 1.730902  | -2.788393 |
| C | 4.329178  | 2.603597  | -1.059962 |
| H | 4.342623  | 3.499355  | 0.896701  |
| H | 3.998617  | 1.677239  | -2.981655 |
| H | 5.412257  | 2.538282  | -1.121259 |
| O | -0.466305 | 0.292313  | 1.221855  |
| C | -1.295962 | -0.106233 | 2.324337  |
| H | -0.706962 | -0.818174 | 2.915696  |
| H | -1.473134 | 0.775591  | 2.952368  |
| O | 2.020840  | -0.160789 | 0.098471  |
| C | 3.149429  | -0.923045 | -0.338462 |
| H | 2.883610  | -1.968417 | -0.132765 |
| H | 3.249525  | -0.851330 | -1.428183 |
| H | 2.142947  | 0.744402  | -0.228511 |
| H | -0.506649 | 1.267010  | 1.082658  |
| C | 4.414070  | -0.518871 | 0.362729  |
| C | 5.646300  | -0.749021 | -0.255432 |
| C | 4.394937  | 0.090793  | 1.619280  |
| C | 6.834722  | -0.386356 | 0.370212  |
| H | 5.666915  | -1.204051 | -1.244275 |
| C | 5.582617  | 0.463012  | 2.243144  |
| H | 3.436640  | 0.300434  | 2.088431  |
| C | 6.806200  | 0.224744  | 1.622302  |
| H | 7.784486  | -0.567996 | -0.125906 |
| H | 5.552129  | 0.947105  | 3.216072  |
| H | 7.732537  | 0.518671  | 2.108118  |
| C | -2.595821 | -0.740289 | 1.923421  |
| C | -2.672243 | -2.122957 | 1.731555  |
| C | -3.744378 | 0.030202  | 1.728863  |
| C | -3.859668 | -2.718959 | 1.320953  |
| H | -1.790227 | -2.736016 | 1.906316  |
| C | -4.936909 | -0.563475 | 1.324472  |
| H | -3.697574 | 1.107739  | 1.878318  |
| C | -4.994962 | -1.938764 | 1.112506  |
| H | -3.897036 | -3.794592 | 1.162908  |
| H | -5.821588 | 0.050579  | 1.174573  |
| H | -5.923641 | -2.402314 | 0.790165  |
| N | -0.500915 | 3.056351  | 0.379526  |
| C | -1.797068 | 3.568673  | 0.400286  |
| C | -2.526855 | 3.450086  | 1.596742  |
| C | -2.406801 | 4.250588  | -0.671664 |
| C | -3.824639 | 3.933729  | 1.702917  |
| H | -2.042567 | 2.967672  | 2.444046  |
| C | -3.704477 | 4.733659  | -0.560039 |
| H | -1.850335 | 4.416075  | -1.590445 |
| C | -4.429476 | 4.570171  | 0.620103  |
| H | -4.365044 | 3.817738  | 2.639402  |

|   |           |          |           |
|---|-----------|----------|-----------|
| H | -4.151903 | 5.256468 | -1.401920 |
| H | -5.441425 | 4.955385 | 0.702019  |

### Fe2-ncp-1

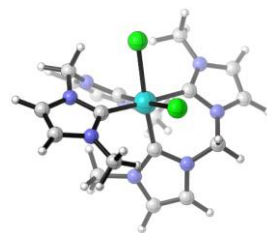

0 1

|    |           |           |           |
|----|-----------|-----------|-----------|
| Fe | 0.000028  | -0.000018 | -0.545480 |
| N  | -1.347418 | -2.219102 | 0.791778  |
| N  | 0.423857  | -1.736823 | 1.900471  |
| N  | -2.843362 | -0.819820 | -0.405422 |
| N  | -2.810181 | 1.288301  | -0.740450 |
| N  | 1.347276  | 2.219034  | 0.791937  |
| N  | -0.424072 | 1.736680  | 1.900480  |
| N  | 2.843347  | 0.819868  | -0.405197 |
| N  | 2.810305  | -1.288239 | -0.740337 |
| C  | -0.262740 | -1.367308 | 0.759975  |
| C  | -0.202397 | -2.774905 | 2.572867  |
| H  | 0.204468  | -3.200255 | 3.476783  |
| C  | -1.323714 | -3.074598 | 1.876954  |
| H  | -2.090832 | -3.813317 | 2.048800  |
| C  | -2.389289 | -2.179184 | -0.213511 |
| H  | -1.980472 | -2.550911 | -1.161180 |
| H  | -3.229954 | -2.784985 | 0.134157  |
| C  | -1.968335 | 0.218634  | -0.602828 |
| C  | -4.165539 | -0.419632 | -0.439658 |
| H  | -4.986634 | -1.110374 | -0.328549 |
| C  | -4.141258 | 0.916850  | -0.657326 |
| H  | -4.942164 | 1.630999  | -0.767244 |
| C  | -2.405969 | 2.670196  | -0.919345 |
| H  | -1.382257 | 2.791644  | -0.569825 |
| H  | -3.089662 | 3.312137  | -0.354199 |
| H  | -2.417080 | 2.943353  | -1.975666 |
| C  | 1.665479  | -1.154340 | 2.360203  |
| H  | 1.658040  | -1.097729 | 3.451911  |
| H  | 1.768204  | -0.151204 | 1.949295  |
| H  | 2.528817  | -1.748840 | 2.041620  |
| C  | 0.262642  | 1.367197  | 0.760049  |
| C  | 0.202141  | 2.774716  | 2.572989  |
| H  | -0.204796 | 3.200022  | 3.476892  |
| C  | 1.323491  | 3.074478  | 1.877155  |
| H  | 2.090573  | 3.813218  | 2.049072  |
| C  | 2.389159  | 2.179200  | -0.213340 |

|    |           |           |           |
|----|-----------|-----------|-----------|
| H  | 1.980328  | 2.550873  | -1.161028 |
| H  | 3.229766  | 2.785077  | 0.134333  |
| C  | 1.968392  | -0.218630 | -0.602668 |
| C  | 4.165550  | 0.419758  | -0.439355 |
| H  | 4.986599  | 1.110546  | -0.328189 |
| C  | 4.141356  | -0.916720 | -0.657067 |
| H  | 4.942310  | -1.630816 | -0.766970 |
| C  | -1.665779 | 1.154227  | 2.360021  |
| H  | -1.768497 | 0.151120  | 1.949041  |
| H  | -2.529049 | 1.748784  | 2.041357  |
| H  | -1.658483 | 1.097555  | 3.451726  |
| C  | 2.406188  | -2.670143 | -0.919374 |
| H  | 2.417596  | -2.943278 | -1.975699 |
| H  | 1.382383  | -2.791627 | -0.570141 |
| H  | 3.089751  | -3.312081 | -0.354067 |
| Cl | -0.209828 | -1.653466 | -2.359435 |
| Cl | 0.210169  | 1.653612  | -2.359212 |

### Fe2-ncpt-1

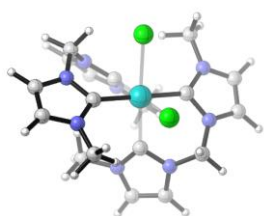

0 3

|    |           |           |           |
|----|-----------|-----------|-----------|
| Fe | -0.000032 | -0.000011 | -0.676491 |
| N  | 1.740690  | 2.042643  | 0.864479  |
| N  | -0.015381 | 1.789083  | 2.046736  |
| N  | 2.937114  | 0.466856  | -0.454152 |
| N  | 2.621285  | -1.620947 | -0.792241 |
| N  | -1.740615 | -2.042623 | 0.864689  |
| N  | 0.015567  | -1.789039 | 2.046775  |
| N  | -2.937153 | -0.466861 | -0.453870 |
| N  | -2.621341 | 1.620926  | -0.792077 |
| C  | 0.514944  | 1.440523  | 0.834986  |
| C  | 0.847776  | 2.579630  | 2.789133  |
| H  | 0.592854  | 2.959832  | 3.766365  |
| C  | 1.966772  | 2.736110  | 2.037607  |
| H  | 2.879378  | 3.279407  | 2.228918  |
| C  | 2.679380  | 1.871863  | -0.232552 |
| H  | 2.226788  | 2.289969  | -1.143351 |
| H  | 3.617066  | 2.367673  | 0.026653  |
| C  | 1.929427  | -0.443779 | -0.686671 |
| C  | 4.188878  | -0.119470 | -0.431117 |
| H  | 5.093834  | 0.449052  | -0.284743 |
| C  | 3.985459  | -1.439441 | -0.653610 |

|    |           |           |           |
|----|-----------|-----------|-----------|
| H  | 4.681883  | -2.258938 | -0.736266 |
| C  | 2.028420  | -2.929549 | -0.992456 |
| H  | 1.023713  | -2.931433 | -0.570036 |
| H  | 2.658904  | -3.675620 | -0.499269 |
| H  | 1.926132  | -3.153026 | -2.055071 |
| C  | -1.335031 | 1.399313  | 2.496903  |
| H  | -1.279705 | 0.938064  | 3.487704  |
| H  | -1.738889 | 0.677313  | 1.786879  |
| H  | -2.001936 | 2.266083  | 2.544220  |
| C  | -0.514871 | -1.440510 | 0.835067  |
| C  | -0.847534 | -2.579545 | 2.789282  |
| H  | -0.592528 | -2.959713 | 3.766505  |
| C  | -1.966594 | -2.736053 | 2.037859  |
| H  | -2.879185 | -3.279342 | 2.229269  |
| C  | -2.679405 | -1.871866 | -0.232262 |
| H  | -2.226897 | -2.289995 | -1.143092 |
| H  | -3.617069 | -2.367663 | 0.027040  |
| C  | -1.929483 | 0.443763  | -0.686506 |
| C  | -4.188909 | 0.119478  | -0.430726 |
| H  | -5.093857 | -0.449032 | -0.284249 |
| C  | -3.985502 | 1.439441  | -0.653282 |
| H  | -4.681928 | 2.258940  | -0.735903 |
| C  | 1.335271  | -1.399284 | 2.496797  |
| H  | 1.739074  | -0.677317 | 1.786709  |
| H  | 2.002161  | -2.266068 | 2.544076  |
| H  | 1.280054  | -0.938001 | 3.487589  |
| C  | -2.028472 | 2.929501  | -0.992461 |
| H  | -1.926330 | 3.152907  | -2.055106 |
| H  | -1.023704 | 2.931384  | -0.570185 |
| H  | -2.658863 | 3.675622  | -0.499234 |
| Cl | 0.482540  | 1.720473  | -2.493715 |
| Cl | -0.482800 | -1.720523 | -2.493635 |

### Fe2-ncpq-1

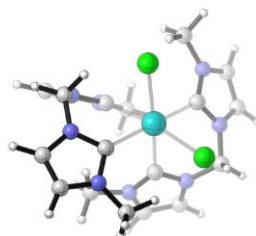

0 5

|    |           |           |           |
|----|-----------|-----------|-----------|
| Fe | -0.000007 | -0.000118 | -0.937207 |
| N  | 1.700087  | 2.083895  | 0.880369  |
| N  | -0.074491 | 1.752216  | 2.004450  |
| N  | 3.092154  | 0.611500  | -0.385272 |
| N  | 2.997308  | -1.481852 | -0.762872 |
| N  | -1.700008 | -2.083938 | 0.880530  |

|    |           |           |           |
|----|-----------|-----------|-----------|
| N  | 0.074626  | -1.752175 | 2.004502  |
| N  | -3.092172 | -0.611536 | -0.384992 |
| N  | -2.997331 | 1.481832  | -0.762506 |
| C  | 0.481372  | 1.473427  | 0.790167  |
| C  | 0.763762  | 2.504739  | 2.813040  |
| H  | 0.481337  | 2.831918  | 3.801950  |
| C  | 1.898534  | 2.707763  | 2.097910  |
| H  | 2.802664  | 3.245724  | 2.339069  |
| C  | 2.674907  | 1.983670  | -0.195949 |
| H  | 2.196325  | 2.333881  | -1.119733 |
| H  | 3.545436  | 2.590263  | 0.060625  |
| C  | 2.217884  | -0.362964 | -0.803582 |
| C  | 4.349292  | 0.113183  | -0.086935 |
| H  | 5.165988  | 0.742478  | 0.232354  |
| C  | 4.287981  | -1.217210 | -0.335527 |
| H  | 5.042650  | -1.985687 | -0.268846 |
| C  | 2.523584  | -2.819327 | -1.068394 |
| H  | 1.534239  | -2.741393 | -1.529208 |
| H  | 2.465012  | -3.417175 | -0.151921 |
| H  | 3.212037  | -3.305363 | -1.763625 |
| C  | -1.390589 | 1.304567  | 2.409483  |
| H  | -1.330508 | 0.730242  | 3.339310  |
| H  | -1.787683 | 0.666987  | 1.619694  |
| H  | -2.062844 | 2.154937  | 2.559505  |
| C  | -0.481231 | -1.473599 | 0.790164  |
| C  | -0.763705 | -2.504391 | 2.813298  |
| H  | -0.481296 | -2.831365 | 3.802280  |
| C  | -1.898508 | -2.707476 | 2.098235  |
| H  | -2.802691 | -3.245281 | 2.339541  |
| C  | -2.674901 | -1.983716 | -0.195711 |
| H  | -2.196398 | -2.333919 | -1.119534 |
| H  | -3.545413 | -2.590308 | 0.060917  |
| C  | -2.217924 | 0.362945  | -0.803309 |
| C  | -4.349281 | -0.113220 | -0.086542 |
| H  | -5.165965 | -0.742520 | 0.232769  |
| C  | -4.287982 | 1.217182  | -0.335096 |
| H  | -5.042645 | 1.985659  | -0.268338 |
| C  | 1.390818  | -1.304657 | 2.409371  |
| H  | 1.787952  | -0.667258 | 1.619455  |
| H  | 2.062961  | -2.155101 | 2.559483  |
| H  | 1.330887  | -0.730176 | 3.339111  |
| C  | -2.523605 | 2.819308  | -1.068029 |
| H  | -3.212060 | 3.305345  | -1.763258 |
| H  | -1.534264 | 2.741364  | -1.528858 |
| H  | -2.465035 | 3.417156  | -0.151556 |
| Cl | 0.421914  | 1.894100  | -2.519047 |
| Cl | -0.422158 | -1.893998 | -2.519120 |

### Fe2-cp-1

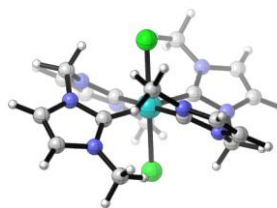

|     |           |           |           |
|-----|-----------|-----------|-----------|
| 0 1 |           |           |           |
| Fe  | -0.000100 | 0.000010  | -0.000259 |
| N   | -2.679446 | 1.187992  | 0.420370  |
| N   | -1.567457 | 2.536503  | -0.808741 |
| N   | -2.679547 | -1.187739 | 0.420376  |
| N   | -1.567668 | -2.536355 | -0.808719 |
| N   | 2.679365  | 1.187788  | -0.420771 |
| N   | 1.567711  | 2.536018  | 0.808942  |
| N   | 2.679246  | -1.188028 | -0.420788 |
| N   | 1.567447  | -2.536171 | 0.808887  |
| C   | -1.439778 | 1.343138  | -0.147493 |
| C   | -2.823461 | 3.093941  | -0.637763 |
| H   | -3.100268 | 4.033006  | -1.090706 |
| C   | -3.533405 | 2.237286  | 0.134286  |
| H   | -4.548482 | 2.278032  | 0.497191  |
| C   | -3.031229 | 0.000143  | 1.169518  |
| H   | -2.483934 | 0.000116  | 2.118159  |
| H   | -4.110639 | 0.000188  | 1.338755  |
| C   | -1.439899 | -1.342983 | -0.147502 |
| C   | -3.533570 | -2.236999 | 0.134363  |
| H   | -4.548633 | -2.277685 | 0.497316  |
| C   | -2.823735 | -3.093662 | -0.637778 |
| H   | -3.100634 | -4.032687 | -1.090748 |
| C   | -0.540102 | -3.157581 | -1.620507 |
| H   | 0.192644  | -2.397867 | -1.892646 |
| H   | -0.991330 | -3.547615 | -2.535605 |
| H   | -0.058688 | -3.983133 | -1.083385 |
| C   | -0.539849 | 3.157625  | -1.620554 |
| H   | -0.991044 | 3.547650  | -2.535673 |
| H   | 0.192847  | 2.397853  | -1.892660 |
| H   | -0.058384 | 3.983167  | -1.083461 |
| C   | 1.439736  | 1.342983  | 0.147173  |
| C   | 2.823960  | 3.093086  | 0.638473  |
| H   | 3.100842  | 4.032042  | 1.091597  |
| C   | 3.533684  | 2.236639  | -0.133976 |
| H   | 4.548687  | 2.277399  | -0.497087 |
| C   | 3.031401  | -0.000132 | -1.169696 |
| H   | 2.485083  | -0.000096 | -2.118884 |
| H   | 4.110939  | -0.000182 | -1.338136 |
| C   | 1.439598  | -1.343109 | 0.147144  |



|    |           |           |           |
|----|-----------|-----------|-----------|
| C  | 3.533471  | -2.236950 | -0.133971 |
| H  | 4.548484  | -2.277789 | -0.497045 |
| C  | 2.823627  | -3.093383 | 0.638383  |
| H  | 3.100396  | -4.032397 | 1.091456  |
| C  | 0.540228  | 3.157383  | 1.620734  |
| H  | -0.192169 | 2.397677  | 1.893848  |
| H  | 0.058272  | 3.982397  | 1.083282  |
| H  | 0.991788  | 3.548258  | 2.535309  |
| C  | 0.539889  | -3.157461 | 1.620639  |
| H  | 0.057945  | -3.982482 | 1.083183  |
| H  | -0.192502 | -2.397720 | 1.893667  |
| H  | 0.991365  | -3.548313 | 2.535266  |
| Cl | -0.132994 | -0.000024 | 2.470390  |
| Cl | 0.132938  | 0.000028  | -2.470508 |

### Fe2-cpt-1

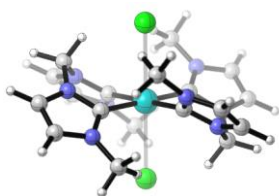

0 3

|    |           |           |           |
|----|-----------|-----------|-----------|
| Fe | 0.000010  | -0.000023 | 0.000121  |
| N  | -2.680090 | -1.189271 | -0.423263 |
| N  | -1.592713 | -2.535999 | 0.835553  |
| N  | -2.680059 | 1.189271  | -0.423264 |
| N  | -1.592631 | 2.535945  | 0.835560  |
| N  | 2.680218  | -1.189245 | 0.423198  |
| N  | 1.592694  | -2.535904 | -0.835560 |
| N  | 2.680156  | 1.189312  | 0.423203  |
| N  | 1.592545  | 2.535888  | -0.835562 |
| C  | -1.453371 | -1.363579 | 0.156998  |
| C  | -2.854055 | -3.078229 | 0.664156  |
| H  | -3.147890 | -4.004006 | 1.132791  |
| C  | -3.547172 | -2.224477 | -0.129135 |
| H  | -4.559030 | -2.259469 | -0.500710 |
| C  | -2.999985 | 0.000005  | -1.191359 |
| H  | -2.397166 | -0.000004 | -2.111925 |
| H  | -4.069291 | 0.000019  | -1.410808 |
| C  | -1.453336 | 1.363533  | 0.156993  |
| C  | -3.547108 | 2.224499  | -0.129107 |
| H  | -4.558967 | 2.259529  | -0.500673 |
| C  | -2.853959 | 3.078218  | 0.664196  |
| H  | -3.147760 | 4.003994  | 1.132851  |
| C  | -0.562127 | 3.127470  | 1.669881  |
| H  | 0.042326  | 2.319277  | 2.093294  |
| H  | -1.039125 | 3.677523  | 2.482847  |

|    |           |           |           |
|----|-----------|-----------|-----------|
| H  | 0.062698  | 3.817838  | 1.092594  |
| C  | -0.562273 | -3.127591 | 1.669909  |
| H  | -1.039342 | -3.677591 | 2.482869  |
| H  | 0.042240  | -2.319449 | 2.093324  |
| H  | 0.062503  | -3.818034 | 1.092661  |
| C  | 1.453417  | -1.363541 | -0.156902 |
| C  | 2.854019  | -3.078202 | -0.664264 |
| H  | 3.147790  | -4.003962 | -1.132970 |
| C  | 3.547242  | -2.224469 | 0.128955  |
| H  | 4.559149  | -2.259476 | 0.500395  |
| C  | 3.000277  | 0.000042  | 1.191214  |
| H  | 2.397661  | 0.000024  | 2.111906  |
| H  | 4.069632  | 0.000069  | 1.410433  |
| C  | 1.453347  | 1.363531  | -0.156892 |
| C  | 3.547117  | 2.224586  | 0.128938  |
| H  | 4.559024  | 2.259657  | 0.500370  |
| C  | 2.853838  | 3.078268  | -0.664292 |
| H  | 3.147550  | 4.004038  | -1.133017 |
| C  | 0.562196  | -3.127340 | -1.669950 |
| H  | -0.042261 | -2.319105 | -2.093274 |
| H  | -0.062622 | -3.817786 | -1.092751 |
| H  | 1.039201  | -3.677299 | -2.482975 |
| C  | 0.561969  | 3.127219  | -1.669928 |
| H  | -0.062928 | 3.817566  | -1.092697 |
| H  | -0.042393 | 2.318909  | -2.093253 |
| H  | 1.038890  | 3.677246  | -2.482957 |
| Cl | -0.191500 | 0.000049  | -2.818553 |
| Cl | 0.191429  | 0.000038  | 2.818730  |

### Fe2-cpq-1

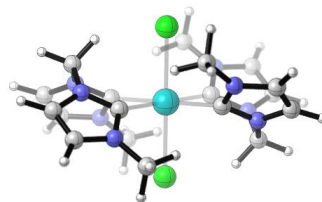

0 5

|    |           |           |           |
|----|-----------|-----------|-----------|
| Fe | -0.000010 | -0.000001 | 0.000067  |
| N  | -2.888113 | -1.189438 | -0.702380 |
| N  | -2.018727 | -2.534446 | 0.699261  |
| N  | -2.888115 | 1.189434  | -0.702382 |
| N  | -2.018727 | 2.534450  | 0.699252  |
| N  | 2.888132  | -1.189439 | 0.702386  |
| N  | 2.018728  | -2.534376 | -0.699307 |
| N  | 2.888132  | 1.189436  | 0.702388  |
| N  | 2.018727  | 2.534377  | -0.699301 |
| C  | -1.702304 | -1.464854 | -0.078526 |
| C  | -3.350936 | -2.894533 | 0.586360  |

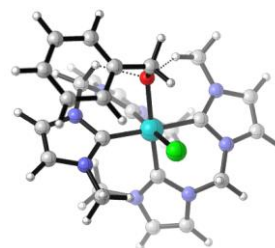

H -3.777038 -3.722675 1.131279  
 C -3.909294 -2.031833 -0.299319  
 H -4.914170 -1.962236 -0.687084  
 C -3.028088 -0.000003 -1.519674  
 H -2.227118 -0.000003 -2.267633  
 H -4.010629 -0.000004 -1.995618  
 C -1.702304 1.464854 -0.078531  
 C -3.909299 2.031818 -0.299308  
 H -4.914180 1.962208 -0.687060  
 C -3.350934 2.894541 0.586344  
 H -3.777034 3.722692 1.131251  
 C -1.075360 3.166534 1.599389  
 H -0.085275 2.762436 1.382831  
 H -1.314690 2.921359 2.636525  
 H -1.088405 4.251288 1.455180  
 C -1.075363 -3.166514 1.599414  
 H -1.314681 -2.921293 2.636543  
 H -0.085273 -2.762442 1.382832  
 H -1.088429 -4.251272 1.455246  
 C 1.702297 -1.464865 0.078585  
 C 3.350941 -2.894463 -0.586454  
 H 3.777041 -3.722562 -1.131438  
 C 3.909318 -2.031788 0.299237  
 H 4.914214 -1.962175 0.686950  
 C 3.028121 -0.000002 1.519674  
 H 2.227152 -0.000003 2.267632  
 H 4.010662 -0.000003 1.995620  
 C 1.702298 1.464861 0.078585  
 C 3.909317 2.031787 0.299243  
 H 4.914212 1.962174 0.686957  
 C 3.350940 2.894463 -0.586446  
 H 3.777039 3.722566 -1.131427  
 C 1.075345 -3.166402 -1.599467  
 H 0.085305 -2.762139 -1.383019  
 H 1.088215 -4.251146 -1.455166  
 H 1.314799 -2.921352 -2.636605  
 C 1.075345 3.166407 -1.599458  
 H 1.088225 4.251151 -1.455163  
 H 0.085302 2.762153 -1.383003  
 H 1.314790 2.921349 -2.636597  
 Cl 0.201942 -0.000005 -2.503764  
 Cl -0.201959 0.000000 2.503877

0 1  
 Fe 0.411899 -0.087004 -0.268817  
 N 2.759336 1.486323 -1.073152  
 N 1.824889 2.468548 0.587179  
 N 3.001861 -0.832125 -1.521377  
 N 2.261130 -2.537446 -0.468198  
 N -0.433372 -0.627549 2.458119  
 N 1.710810 -0.595922 2.426040  
 N -1.992431 0.696701 1.256360  
 N -1.673822 2.216052 -0.209253  
 C 1.659840 1.375933 -0.243923  
 C 2.954300 3.206052 0.267202  
 H 3.226871 4.100807 0.804753  
 C 3.548560 2.581908 -0.776151  
 H 4.439997 2.822683 -1.334199  
 C 3.061922 0.497478 -2.087823  
 H 2.322080 0.573526 -2.892261  
 H 4.074512 0.677894 -2.457373  
 C 1.919919 -1.254010 -0.790321  
 C 3.971646 -1.810170 -1.648780  
 H 4.875103 -1.663827 -2.220218  
 C 3.498087 -2.890198 -0.980340  
 H 3.916678 -3.874608 -0.839807  
 C 1.460637 -3.399066 0.384961  
 H 0.432158 -3.004926 0.352448  
 H 1.857665 -3.399420 1.408360  
 H 1.492891 -4.420096 -0.003372  
 C 0.960815 2.820663 1.692303  
 H 1.567792 3.108154 2.555941  
 H 0.349351 1.959343 1.956379  
 H 0.297829 3.653349 1.433209  
 C 0.621877 -0.461272 1.589221  
 C 1.332014 -0.853378 3.734682  
 H 2.054162 -1.001635 4.522182  
 C -0.021516 -0.865012 3.755446  
 H -0.718205 -1.025152 4.563506  
 C -1.814277 -0.512642 2.029689  
 H -2.052780 -1.372157 1.397934  
 H -2.450938 -0.457479 2.916908  
 C -1.162431 1.019427 0.212393  
 C -2.983042 1.636503 1.460132

**Fe2-ncp-2**

|    |           |           |           |
|----|-----------|-----------|-----------|
| H  | -3.751190 | 1.517449  | 2.208285  |
| C  | -2.783989 | 2.596348  | 0.525822  |
| H  | -3.336780 | 3.496248  | 0.305872  |
| C  | 3.096535  | -0.520657 | 2.021567  |
| H  | 3.158087  | -0.046521 | 1.043953  |
| H  | 3.546179  | -1.518112 | 1.953737  |
| H  | 3.661842  | 0.073672  | 2.745481  |
| C  | -1.151441 | 3.014025  | -1.298819 |
| H  | -1.814645 | 2.956488  | -2.166757 |
| H  | -0.185344 | 2.610471  | -1.598393 |
| H  | -1.061156 | 4.057567  | -0.978092 |
| Cl | -0.006254 | 0.309337  | -2.685425 |
| O  | -0.827038 | -1.747435 | -0.239857 |
| C  | -1.684639 | -2.118512 | -1.266084 |
| H  | -1.814244 | -3.222931 | -1.254139 |
| H  | -1.297301 | -1.856255 | -2.264366 |
| C  | -3.050685 | -1.491683 | -1.085853 |
| C  | -3.990839 | -2.071029 | -0.226312 |
| C  | -3.370062 | -0.266946 | -1.684836 |
| C  | -5.208832 | -1.448675 | 0.040738  |
| H  | -3.755798 | -3.031066 | 0.235065  |
| C  | -4.585614 | 0.359473  | -1.421801 |
| H  | -2.634669 | 0.187666  | -2.347884 |
| C  | -5.510238 | -0.226528 | -0.557561 |
| H  | -5.929950 | -1.922572 | 0.703937  |
| H  | -4.815610 | 1.312501  | -1.896389 |
| H  | -6.461430 | 0.261531  | -0.357729 |

### Fe2-cp-2

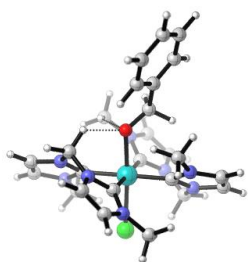

|     |           |           |           |
|-----|-----------|-----------|-----------|
| O 1 |           |           |           |
| Fe  | 0.802678  | -0.011783 | 0.210528  |
| N   | 1.424441  | 2.860675  | -0.093424 |
| N   | 1.027655  | 2.040614  | -2.029829 |
| N   | 0.385923  | 2.323103  | 1.975632  |
| N   | -1.201568 | 0.932156  | 2.326774  |
| N   | 1.192170  | -2.316524 | -1.590273 |
| N   | 2.843673  | -0.997790 | -1.900423 |
| N   | 0.050134  | -2.853114 | 0.423519  |
| N   | 0.463919  | -2.176157 | 2.407718  |
| C   | 1.126328  | 1.673573  | -0.713668 |

|    |           |           |           |
|----|-----------|-----------|-----------|
| C  | 1.266490  | 3.392952  | -2.210499 |
| H  | 1.231457  | 3.859338  | -3.182679 |
| C  | 1.510412  | 3.916194  | -0.983778 |
| H  | 1.738783  | 4.923928  | -0.673481 |
| C  | 1.536314  | 2.944021  | 1.349578  |
| H  | 2.442233  | 2.416279  | 1.667227  |
| H  | 1.569665  | 3.996641  | 1.640306  |
| C  | -0.055208 | 1.081217  | 1.590149  |
| C  | -0.446552 | 2.914945  | 2.909135  |
| H  | -0.250163 | 3.888935  | 3.329614  |
| C  | -1.447056 | 2.029382  | 3.135222  |
| H  | -2.307471 | 2.086164  | 3.783494  |
| C  | -2.122829 | -0.175696 | 2.167925  |
| H  | -1.851853 | -0.700962 | 1.248873  |
| H  | -3.142737 | 0.205111  | 2.066666  |
| H  | -2.078889 | -0.857974 | 3.024908  |
| C  | 0.656052  | 1.129512  | -3.094731 |
| H  | -0.012002 | 1.640890  | -3.792159 |
| H  | 0.135283  | 0.281434  | -2.639873 |
| H  | 1.537253  | 0.777206  | -3.643542 |
| C  | 1.691593  | -1.110613 | -1.170791 |
| C  | 3.033691  | -2.080503 | -2.742836 |
| H  | 3.893628  | -2.161161 | -3.389177 |
| C  | 1.991523  | -2.923086 | -2.542061 |
| H  | 1.755974  | -3.881823 | -2.977199 |
| C  | -0.022957 | -2.865866 | -1.024217 |
| H  | -0.866387 | -2.246659 | -1.343568 |
| H  | -0.132669 | -3.899511 | -1.360970 |
| C  | 0.432933  | -1.731013 | 1.114779  |
| C  | -0.155153 | -3.942933 | 1.250684  |
| H  | -0.451648 | -4.910955 | 0.877756  |
| C  | 0.098300  | -3.508092 | 2.508742  |
| H  | 0.068207  | -4.025145 | 3.455073  |
| C  | 3.752230  | 0.129287  | -1.840320 |
| H  | 3.586420  | 0.652989  | -0.897801 |
| H  | 3.595138  | 0.804481  | -2.690309 |
| H  | 4.782319  | -0.233219 | -1.863176 |
| C  | 0.821048  | -1.360465 | 3.551225  |
| H  | -0.073516 | -1.027115 | 4.090364  |
| H  | 1.394744  | -0.503318 | 3.194327  |
| H  | 1.446462  | -1.943922 | 4.230631  |
| Cl | 2.986847  | 0.103644  | 1.422215  |
| O  | -0.977660 | -0.260348 | -0.796286 |
| C  | -1.840938 | 0.784515  | -0.970573 |
| H  | -1.613085 | 1.410614  | -1.869046 |
| H  | -1.806274 | 1.526464  | -0.137938 |
| C  | -3.288148 | 0.351662  | -1.105194 |

|   |           |           |           |
|---|-----------|-----------|-----------|
| C | -4.279755 | 1.290213  | -1.410164 |
| C | -3.671684 | -0.975542 | -0.908267 |
| C | -5.615007 | 0.916958  | -1.511990 |
| H | -3.991775 | 2.329343  | -1.570178 |
| C | -5.008812 | -1.356249 | -1.009940 |
| H | -2.897360 | -1.699040 | -0.661635 |
| C | -5.986482 | -0.412883 | -1.311883 |
| H | -6.370432 | 1.662563  | -1.749131 |
| H | -5.289252 | -2.395580 | -0.852690 |
| H | -7.029246 | -0.708496 | -1.392810 |

### Fe2-cpt-2

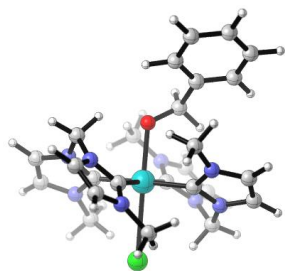

O 3

|    |           |           |           |
|----|-----------|-----------|-----------|
| Fe | -0.740869 | -0.037943 | 0.206034  |
| N  | -0.724724 | -3.037205 | 0.287165  |
| N  | -0.954586 | -2.403499 | -1.743120 |
| N  | 0.641246  | -2.050116 | 1.950369  |
| N  | 1.895666  | -0.325930 | 1.777830  |
| N  | -2.053200 | 1.904900  | -1.588083 |
| N  | -3.434834 | 0.292101  | -1.336198 |
| N  | -0.696213 | 2.909056  | 0.070722  |
| N  | -0.604116 | 2.399885  | 2.145973  |
| C  | -0.872819 | -1.912563 | -0.472202 |
| C  | -0.857825 | -3.783438 | -1.765098 |
| H  | -0.902047 | -4.348913 | -2.682673 |
| C  | -0.702728 | -4.187251 | -0.478734 |
| H  | -0.594650 | -5.171282 | -0.050378 |
| C  | -0.488277 | -2.929425 | 1.714596  |
| H  | -1.380713 | -2.483656 | 2.182329  |
| H  | -0.265237 | -3.918549 | 2.118615  |
| C  | 0.661900  | -0.789745 | 1.423720  |
| C  | 1.822208  | -2.367883 | 2.594329  |
| H  | 1.988190  | -3.321824 | 3.069657  |
| C  | 2.612725  | -1.269784 | 2.490265  |
| H  | 3.614918  | -1.082165 | 2.842783  |
| C  | 2.396867  | 0.992752  | 1.435724  |
| H  | 1.891109  | 1.316791  | 0.522373  |
| H  | 3.469997  | 0.934423  | 1.241575  |
| H  | 2.211367  | 1.703016  | 2.249779  |
| C  | -1.074337 | -1.566651 | -2.923182 |

|    |           |           |           |
|----|-----------|-----------|-----------|
| H  | -0.550702 | -2.043168 | -3.754548 |
| H  | -0.608881 | -0.601176 | -2.692830 |
| H  | -2.125107 | -1.425192 | -3.200682 |
| C  | -2.191649 | 0.699717  | -0.958043 |
| C  | -4.041209 | 1.211847  | -2.173975 |
| H  | -5.032751 | 1.059301  | -2.570366 |
| C  | -3.171135 | 2.241810  | -2.327768 |
| H  | -3.247229 | 3.161188  | -2.886702 |
| C  | -0.869425 | 2.712998  | -1.356789 |
| H  | 0.000835  | 2.165026  | -1.740468 |
| H  | -0.993411 | 3.683061  | -1.842382 |
| C  | -0.667255 | 1.830498  | 0.910618  |
| C  | -0.660479 | 4.108790  | 0.756385  |
| H  | -0.682977 | 5.066515  | 0.260730  |
| C  | -0.590697 | 3.781752  | 2.071515  |
| H  | -0.546316 | 4.402452  | 2.952583  |
| C  | -4.037449 | -0.963187 | -0.925044 |
| H  | -3.692036 | -1.196947 | 0.088672  |
| H  | -3.766158 | -1.767966 | -1.618092 |
| H  | -5.122981 | -0.851326 | -0.919255 |
| C  | -0.544352 | 1.645392  | 3.384823  |
| H  | 0.495000  | 1.424623  | 3.653878  |
| H  | -1.112829 | 0.717748  | 3.252621  |
| H  | -0.999026 | 2.234931  | 4.182762  |
| Cl | -2.792400 | -0.673554 | 2.248106  |
| O  | 0.779792  | 0.378866  | -1.334779 |
| C  | 1.749523  | -0.556626 | -1.573312 |
| H  | 1.650180  | -1.019369 | -2.588659 |
| H  | 1.695002  | -1.434889 | -0.883483 |
| C  | 3.166377  | -0.023454 | -1.482187 |
| C  | 4.216840  | -0.828177 | -1.033669 |
| C  | 3.445339  | 1.303694  | -1.817961 |
| C  | 5.511689  | -0.325515 | -0.923348 |
| H  | 4.004850  | -1.858784 | -0.747435 |
| C  | 4.736424  | 1.811886  | -1.714170 |
| H  | 2.616565  | 1.934149  | -2.133416 |
| C  | 5.776722  | 0.999668  | -1.263501 |
| H  | 6.314224  | -0.965117 | -0.562499 |
| H  | 4.935193  | 2.848410  | -1.978094 |
| H  | 6.784147  | 1.397728  | -1.173397 |

### Fe2-ncp-TSIM1

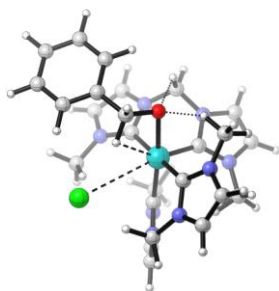

0 1

|    |           |           |           |
|----|-----------|-----------|-----------|
| Fe | -0.379339 | 0.026782  | -0.185408 |
| N  | -2.300782 | -1.757972 | 1.199811  |
| N  | -1.457722 | -0.402201 | 2.626373  |
| N  | -2.749035 | -1.528661 | -1.121708 |
| N  | -2.370284 | 0.059225  | -2.504870 |
| N  | -0.200927 | 2.875057  | 0.059333  |
| N  | -2.267131 | 2.315819  | 0.239056  |
| N  | 1.750566  | 1.768499  | 0.834556  |
| N  | 2.064003  | -0.143451 | 1.734809  |
| C  | -1.370475 | -0.749574 | 1.294848  |
| C  | -2.363002 | -1.193506 | 3.313057  |
| H  | -2.545351 | -1.073719 | 4.369320  |
| C  | -2.894768 | -2.051511 | 2.410461  |
| H  | -3.622384 | -2.839759 | 2.521674  |
| C  | -2.563532 | -2.468618 | -0.034478 |
| H  | -1.693727 | -3.122588 | -0.245526 |
| H  | -3.482771 | -3.046283 | 0.087041  |
| C  | -1.871550 | -0.506134 | -1.363941 |
| C  | -3.744677 | -1.603291 | -2.074822 |
| H  | -4.501047 | -2.372355 | -2.064961 |
| C  | -3.505985 | -0.592036 | -2.948021 |
| H  | -4.027291 | -0.292297 | -3.843658 |
| C  | -1.820531 | 1.254736  | -3.120074 |
| H  | -0.753985 | 1.283986  | -2.861968 |
| H  | -2.336909 | 2.150052  | -2.750914 |
| H  | -1.953977 | 1.194396  | -4.202360 |
| C  | -0.732252 | 0.678428  | 3.258907  |
| H  | -1.321854 | 1.062327  | 4.094376  |
| H  | -0.566264 | 1.479804  | 2.537929  |
| H  | 0.240247  | 0.347444  | 3.637244  |
| C  | -1.017888 | 1.766215  | 0.046801  |
| C  | -2.211253 | 3.697531  | 0.340354  |
| H  | -3.096984 | 4.296312  | 0.482375  |
| C  | -0.908320 | 4.049781  | 0.236977  |
| H  | -0.428271 | 5.015140  | 0.269953  |
| C  | 1.237329  | 2.769212  | -0.073394 |
| H  | 1.477968  | 2.458443  | -1.094857 |
| H  | 1.682151  | 3.736164  | 0.175377  |
| C  | 1.223563  | 0.505622  | 0.881820  |

|    |           |           |           |
|----|-----------|-----------|-----------|
| C  | 2.890273  | 1.892644  | 1.605741  |
| H  | 3.464048  | 2.804837  | 1.655123  |
| C  | 3.085250  | 0.678540  | 2.175554  |
| H  | 3.864958  | 0.319869  | 2.828731  |
| C  | -3.509657 | 1.575433  | 0.266760  |
| H  | -3.327717 | 0.574801  | 0.656902  |
| H  | -3.943001 | 1.482167  | -0.735617 |
| H  | -4.222308 | 2.092252  | 0.913238  |
| C  | 1.922070  | -1.529133 | 2.141871  |
| H  | 2.900369  | -2.014093 | 2.108687  |
| H  | 1.257827  | -2.059758 | 1.447391  |
| H  | 1.526238  | -1.589608 | 3.162788  |
| C  | 1.376795  | -0.598195 | -1.981983 |
| H  | 0.891972  | -1.445612 | -1.437008 |
| O  | 0.708699  | 0.601454  | -1.781299 |
| Cl | 0.410266  | -3.559577 | -0.128651 |
| H  | 1.314623  | -0.913539 | -3.045038 |
| C  | 2.831284  | -0.576032 | -1.563076 |
| C  | 3.431107  | -1.703958 | -0.992403 |
| C  | 3.599289  | 0.579762  | -1.731117 |
| C  | 4.767370  | -1.669646 | -0.598524 |
| H  | 2.822272  | -2.595620 | -0.834054 |
| C  | 4.936622  | 0.613226  | -1.344578 |
| H  | 3.128004  | 1.454546  | -2.176947 |
| C  | 5.526344  | -0.513475 | -0.773800 |
| H  | 5.218104  | -2.551834 | -0.148192 |
| H  | 5.522694  | 1.518888  | -1.489632 |
| H  | 6.569842  | -0.489835 | -0.468519 |

### Fe2-ncp-IM1-o

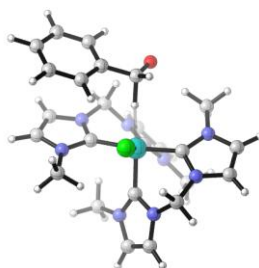

0 1

|    |           |           |           |
|----|-----------|-----------|-----------|
| Fe | 0.439731  | 0.054026  | -0.286290 |
| N  | 2.863128  | 1.576273  | -0.880417 |
| N  | 2.023417  | 2.325946  | 0.945262  |
| N  | 2.923796  | -0.644819 | -1.724699 |
| N  | 2.098028  | -2.450043 | -0.925417 |
| N  | -0.356398 | -0.932781 | 2.340421  |
| N  | 1.782834  | -0.979735 | 2.222304  |
| N  | -1.942425 | 0.542563  | 1.371547  |
| N  | -1.674509 | 2.271806  | 0.144629  |

|    |           |           |           |
|----|-----------|-----------|-----------|
| C  | 1.780779  | 1.398524  | -0.045103 |
| C  | 3.189397  | 3.039441  | 0.716633  |
| H  | 3.526234  | 3.818152  | 1.382771  |
| C  | 3.722950  | 2.562632  | -0.432574 |
| H  | 4.614308  | 2.842893  | -0.971860 |
| C  | 3.074743  | 0.754616  | -2.057117 |
| H  | 2.333158  | 1.021411  | -2.817084 |
| H  | 4.092690  | 0.922250  | -2.417230 |
| C  | 1.833339  | -1.114462 | -1.035411 |
| C  | 3.828501  | -1.645868 | -2.028680 |
| H  | 4.726581  | -1.465703 | -2.598781 |
| C  | 3.300583  | -2.786985 | -1.522980 |
| H  | 3.657480  | -3.804557 | -1.551360 |
| C  | 1.299004  | -3.402108 | -0.167548 |
| H  | 0.222373  | -3.163440 | -0.190279 |
| H  | 1.641986  | -3.436638 | 0.874223  |
| H  | 1.434905  | -4.392739 | -0.606453 |
| C  | 1.197822  | 2.532777  | 2.115000  |
| H  | 1.817679  | 2.521308  | 3.016718  |
| H  | 0.465175  | 1.729409  | 2.173016  |
| H  | 0.668992  | 3.490046  | 2.058832  |
| C  | 0.669781  | -0.674395 | 1.463040  |
| C  | 1.438012  | -1.425872 | 3.488928  |
| H  | 2.180476  | -1.723868 | 4.212343  |
| C  | 0.086800  | -1.391947 | 3.563826  |
| H  | -0.588860 | -1.659974 | 4.360626  |
| C  | -1.742453 | -0.771932 | 1.952319  |
| H  | -2.004776 | -1.585252 | 1.255482  |
| H  | -2.364594 | -0.849056 | 2.847498  |
| C  | -1.107084 | 1.059294  | 0.412756  |
| C  | -3.003594 | 1.379006  | 1.652453  |
| H  | -3.790094 | 1.107307  | 2.338678  |
| C  | -2.834672 | 2.473425  | 0.872019  |
| H  | -3.438062 | 3.359732  | 0.755594  |
| C  | 3.158874  | -0.910295 | 1.784407  |
| H  | 3.224529  | -0.292763 | 0.891466  |
| H  | 3.550131  | -1.906557 | 1.547562  |
| H  | 3.775182  | -0.467324 | 2.572207  |
| C  | -1.162496 | 3.234078  | -0.808438 |
| H  | -1.719466 | 3.179776  | -1.747492 |
| H  | -0.124268 | 2.990163  | -1.031003 |
| H  | -1.243539 | 4.240406  | -0.385722 |
| Cl | -0.004230 | 0.790745  | -2.572725 |
| O  | -1.700375 | -2.998758 | -0.168305 |
| C  | -1.741600 | -1.974161 | -0.966820 |
| H  | -1.378115 | -2.110712 | -2.017249 |
| H  | -0.903711 | -1.124179 | -0.643020 |

|   |           |           |           |
|---|-----------|-----------|-----------|
| C | -3.058421 | -1.196021 | -0.984229 |
| C | -4.120262 | -1.682031 | -0.217166 |
| C | -3.248229 | -0.029501 | -1.732186 |
| C | -5.341065 | -1.010776 | -0.177896 |
| H | -3.951759 | -2.604606 | 0.334112  |
| C | -4.464680 | 0.646069  | -1.687734 |
| H | -2.422687 | 0.353020  | -2.329400 |
| C | -5.516321 | 0.161500  | -0.909283 |
| H | -6.161351 | -1.408050 | 0.417200  |
| H | -4.594597 | 1.559005  | -2.267224 |
| H | -6.467443 | 0.688747  | -0.882561 |

**Fe2-ncp-IM1-i**

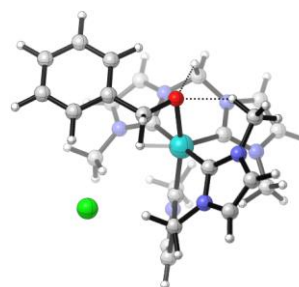

|     |           |           |           |
|-----|-----------|-----------|-----------|
| O 1 |           |           |           |
| Fe  | -0.397632 | 0.141827  | -0.237516 |
| N   | -1.689143 | -2.112346 | 1.134983  |
| N   | -1.099648 | -0.671015 | 2.604514  |
| N   | -2.372373 | -1.886149 | -1.123245 |
| N   | -2.526033 | -0.168637 | -2.390402 |
| N   | -0.797841 | 2.962195  | 0.076994  |
| N   | -2.684274 | 1.994149  | 0.415802  |
| N   | 1.390318  | 2.270540  | 0.680294  |
| N   | 2.122243  | 0.454777  | 1.541604  |
| C   | -1.061446 | -0.896524 | 1.247516  |
| C   | -1.663223 | -1.736383 | 3.289445  |
| H   | -1.749596 | -1.746495 | 4.364288  |
| C   | -2.028984 | -2.648640 | 2.358648  |
| H   | -2.470332 | -3.627397 | 2.456559  |
| C   | -1.831282 | -2.797309 | -0.132222 |
| H   | -0.830681 | -3.182397 | -0.418276 |
| H   | -2.523468 | -3.632029 | -0.003806 |
| C   | -1.817286 | -0.656368 | -1.329482 |
| C   | -3.389380 | -2.157868 | -2.017165 |
| H   | -3.922595 | -3.095484 | -2.023187 |
| C   | -3.488773 | -1.065995 | -2.818379 |
| H   | -4.138190 | -0.858821 | -3.654446 |
| C   | -2.316492 | 1.151752  | -2.952408 |
| H   | -1.267748 | 1.411063  | -2.790597 |
| H   | -2.973842 | 1.890340  | -2.476955 |
| H   | -2.531615 | 1.127078  | -4.022568 |

|    |           |           |           |
|----|-----------|-----------|-----------|
| C  | -0.655639 | 0.536552  | 3.264125  |
| H  | -1.298940 | 0.734354  | 4.124933  |
| H  | -0.719913 | 1.373470  | 2.567471  |
| H  | 0.379672  | 0.453037  | 3.611539  |
| C  | -1.374408 | 1.710460  | 0.101177  |
| C  | -2.896951 | 3.357385  | 0.559182  |
| H  | -3.866963 | 3.763742  | 0.798742  |
| C  | -1.705569 | 3.968432  | 0.355536  |
| H  | -1.428969 | 5.010755  | 0.379199  |
| C  | 0.615411  | 3.126188  | -0.190816 |
| H  | 0.819257  | 2.835177  | -1.226995 |
| H  | 0.891764  | 4.168185  | -0.014092 |
| C  | 1.118822  | 0.932350  | 0.756193  |
| C  | 2.536120  | 2.613934  | 1.375083  |
| H  | 2.924294  | 3.620045  | 1.403028  |
| C  | 2.994255  | 1.459497  | 1.920286  |
| H  | 3.866435  | 1.260363  | 2.522745  |
| C  | -3.734714 | 1.006352  | 0.533957  |
| H  | -3.297212 | 0.053318  | 0.832356  |
| H  | -4.258746 | 0.863811  | -0.418192 |
| H  | -4.454704 | 1.328681  | 1.289405  |
| C  | 2.280154  | -0.938722 | 1.926353  |
| H  | 3.325808  | -1.228771 | 1.808007  |
| H  | 1.677605  | -1.596743 | 1.287084  |
| H  | 1.981876  | -1.084344 | 2.971052  |
| C  | 1.160456  | -0.466098 | -1.781453 |
| H  | 0.928637  | -1.187837 | -2.592407 |
| C  | 2.655742  | -0.388630 | -1.550556 |
| C  | 3.385360  | -1.521320 | -1.175370 |
| C  | 3.314374  | 0.832905  | -1.698416 |
| C  | 4.752562  | -1.417237 | -0.933542 |
| H  | 2.862832  | -2.466852 | -1.015798 |
| C  | 4.683049  | 0.932489  | -1.460821 |
| H  | 2.728340  | 1.699363  | -1.995957 |
| C  | 5.406126  | -0.192801 | -1.071719 |
| H  | 5.308734  | -2.299777 | -0.626197 |
| H  | 5.186423  | 1.890040  | -1.578501 |
| H  | 6.474389  | -0.117667 | -0.882316 |
| H  | 0.758303  | -1.100385 | -0.869052 |
| O  | 0.529399  | 0.729963  | -1.917958 |
| Cl | 1.158232  | -3.773884 | 0.333958  |

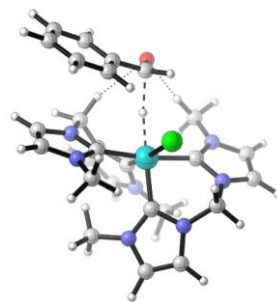

**Fe2-ncp-TS1-o**

|     |    |           |           |           |
|-----|----|-----------|-----------|-----------|
| 0 1 | Fe | 0.435321  | 0.018568  | -0.268146 |
|     | N  | 2.884802  | 1.462722  | -1.039591 |
|     | N  | 2.093920  | 2.387570  | 0.723728  |
|     | N  | 2.899572  | -0.827466 | -1.670331 |
|     | N  | 2.072763  | -2.535205 | -0.683412 |
|     | N  | -0.360773 | -0.737793 | 2.415890  |
|     | N  | 1.781701  | -0.749074 | 2.327939  |
|     | N  | -1.940676 | 0.647964  | 1.326467  |
|     | N  | -1.649762 | 2.282263  | -0.019714 |
|     | C  | 1.808218  | 1.385729  | -0.180665 |
|     | C  | 3.281803  | 3.038608  | 0.428222  |
|     | H  | 3.652093  | 3.858968  | 1.023030  |
|     | C  | 3.784566  | 2.450234  | -0.682718 |
|     | H  | 4.676690  | 2.656652  | -1.253489 |
|     | C  | 3.055724  | 0.532088  | -2.138554 |
|     | H  | 2.293199  | 0.734305  | -2.898405 |
|     | H  | 4.064020  | 0.652136  | -2.542224 |
|     | C  | 1.813123  | -1.213242 | -0.922229 |
|     | C  | 3.793352  | -1.861695 | -1.882434 |
|     | H  | 4.685151  | -1.748177 | -2.478915 |
|     | C  | 3.265101  | -2.941711 | -1.256980 |
|     | H  | 3.614868  | -3.959854 | -1.187883 |
|     | C  | 1.253687  | -3.397899 | 0.150316  |
|     | H  | 0.187222  | -3.211427 | -0.015317 |
|     | H  | 1.490266  | -3.248143 | 1.210392  |
|     | H  | 1.467176  | -4.436487 | -0.109939 |
|     | C  | 1.296230  | 2.701537  | 1.887812  |
|     | H  | 1.899340  | 2.618391  | 2.798230  |
|     | H  | 0.470530  | 1.992888  | 1.940762  |
|     | H  | 0.893019  | 3.717504  | 1.822805  |
|     | C  | 0.673245  | -0.533406 | 1.526633  |
|     | C  | 1.426803  | -1.077100 | 3.628822  |
|     | H  | 2.164162  | -1.291677 | 4.386438  |
|     | C  | 0.074691  | -1.063177 | 3.685576  |
|     | H  | -0.605253 | -1.266437 | 4.497979  |
|     | C  | -1.734890 | -0.622928 | 1.985957  |
|     | H  | -1.967834 | -1.454195 | 1.311010  |
|     | H  | -2.387401 | -0.675225 | 2.861100  |

|    |           |           |           |
|----|-----------|-----------|-----------|
| C  | -1.099242 | 1.079814  | 0.328694  |
| C  | -2.977495 | 1.528267  | 1.566074  |
| H  | -3.758904 | 1.325614  | 2.281506  |
| C  | -2.794889 | 2.560464  | 0.708251  |
| H  | -3.380557 | 3.450289  | 0.538567  |
| C  | 3.161086  | -0.687712 | 1.902593  |
| H  | 3.207029  | -0.273745 | 0.897752  |
| H  | 3.612886  | -1.686237 | 1.890313  |
| H  | 3.737511  | -0.047781 | 2.578788  |
| C  | -1.121987 | 3.164804  | -1.038245 |
| H  | -1.689098 | 3.066871  | -1.967788 |
| H  | -0.094215 | 2.872807  | -1.252343 |
| H  | -1.167481 | 4.199122  | -0.682649 |
| Cl | -0.037652 | 0.557827  | -2.636998 |
| O  | -1.816088 | -3.158338 | -0.256331 |
| C  | -1.870374 | -2.134499 | -0.983333 |
| H  | -1.351593 | -2.091662 | -1.965968 |
| H  | -0.779113 | -1.134603 | -0.462347 |
| C  | -3.105545 | -1.271029 | -0.926374 |
| C  | -4.142703 | -1.655701 | -0.070280 |
| C  | -3.271204 | -0.138846 | -1.730031 |
| C  | -5.319497 | -0.915676 | -0.001849 |
| H  | -3.998863 | -2.559224 | 0.518452  |
| C  | -4.446127 | 0.603670  | -1.657066 |
| H  | -2.456688 | 0.160410  | -2.387643 |
| C  | -5.473254 | 0.220542  | -0.794435 |
| H  | -6.124698 | -1.231483 | 0.658339  |
| H  | -4.563392 | 1.488254  | -2.280573 |
| H  | -6.392984 | 0.799332  | -0.747952 |

**Fe2-cp-TS1-o**

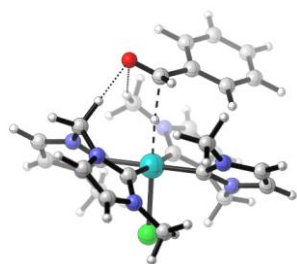

|     |           |           |           |
|-----|-----------|-----------|-----------|
| O 1 |           |           |           |
| Fe  | -0.628775 | 0.086672  | 0.339336  |
| N   | 1.011112  | 2.326358  | 1.325549  |
| N   | 0.135113  | 2.947955  | -0.523371 |
| N   | 1.803368  | 0.193970  | 2.007373  |
| N   | 1.826191  | -1.651605 | 0.928515  |
| N   | -2.917087 | -0.110782 | -1.503528 |
| N   | -3.163602 | 1.697640  | -0.389006 |
| N   | -2.128473 | -2.207961 | -0.736560 |

|    |           |           |           |
|----|-----------|-----------|-----------|
| N  | -1.482152 | -2.737233 | 1.231001  |
| C  | 0.155250  | 1.877779  | 0.346225  |
| C  | 0.939583  | 3.991316  | -0.091318 |
| H  | 1.045085  | 4.906800  | -0.652106 |
| C  | 1.498379  | 3.595045  | 1.077002  |
| H  | 2.175168  | 4.100482  | 1.748395  |
| C  | 1.370767  | 1.497240  | 2.457844  |
| H  | 0.491014  | 1.380786  | 3.101097  |
| H  | 2.192386  | 1.976480  | 2.995565  |
| C  | 1.048371  | -0.537940 | 1.126086  |
| C  | 2.991743  | -0.429404 | 2.341998  |
| H  | 3.712446  | 0.009601  | 3.013912  |
| C  | 2.998666  | -1.601003 | 1.662742  |
| H  | 3.739186  | -2.383765 | 1.611657  |
| C  | 1.499121  | -2.758449 | 0.049657  |
| H  | 0.925753  | -2.402583 | -0.809083 |
| H  | 2.428053  | -3.201676 | -0.313713 |
| H  | 0.923538  | -3.527810 | 0.575039  |
| C  | -0.526912 | 2.960243  | -1.809057 |
| H  | 0.185962  | 3.229026  | -2.594789 |
| H  | -0.914248 | 1.961269  | -2.005895 |
| H  | -1.355062 | 3.677574  | -1.824428 |
| C  | -2.298408 | 0.642006  | -0.534051 |
| C  | -4.255134 | 1.596113  | -1.235800 |
| H  | -5.038497 | 2.337715  | -1.252449 |
| C  | -4.107302 | 0.444780  | -1.934489 |
| H  | -4.728104 | -0.017871 | -2.685767 |
| C  | -2.377555 | -1.393410 | -1.907497 |
| H  | -1.441557 | -1.271734 | -2.468431 |
| H  | -3.112955 | -1.899902 | -2.537155 |
| C  | -1.409258 | -1.714132 | 0.321856  |
| C  | -2.619411 | -3.478370 | -0.503027 |
| H  | -3.208385 | -4.018160 | -1.227783 |
| C  | -2.199721 | -3.815695 | 0.740270  |
| H  | -2.357646 | -4.710742 | 1.321420  |
| C  | -2.984357 | 2.798584  | 0.535145  |
| H  | -2.237291 | 2.508727  | 1.274746  |
| H  | -2.675237 | 3.708303  | 0.006155  |
| H  | -3.925223 | 2.995932  | 1.054019  |
| C  | -0.866897 | -2.732121 | 2.542720  |
| H  | 0.051220  | -3.332715 | 2.547242  |
| H  | -0.651369 | -1.699353 | 2.818739  |
| H  | -1.564658 | -3.149275 | 3.272269  |
| Cl | -1.677434 | 0.504818  | 2.578945  |
| O  | 0.499627  | -1.500243 | -2.981176 |
| C  | 0.880158  | -0.422021 | -2.466502 |
| H  | 0.456464  | 0.547578  | -2.821538 |



|   |          |           |           |
|---|----------|-----------|-----------|
| H | 0.105434 | -0.210313 | -1.130130 |
| C | 2.300783 | -0.276732 | -1.992131 |
| C | 2.776526 | 0.903204  | -1.416150 |
| C | 3.187534 | -1.336986 | -2.188713 |
| C | 4.097544 | 1.005422  | -0.995892 |
| H | 2.098646 | 1.742281  | -1.288476 |
| C | 4.514104 | -1.236086 | -1.779149 |
| H | 2.801972 | -2.232176 | -2.670469 |
| C | 4.970574 | -0.068619 | -1.170292 |
| H | 4.447178 | 1.926216  | -0.533303 |
| H | 5.197252 | -2.067104 | -1.940020 |
| H | 6.004824 | 0.009989  | -0.844794 |

### Fe2-ncp-TS1-i

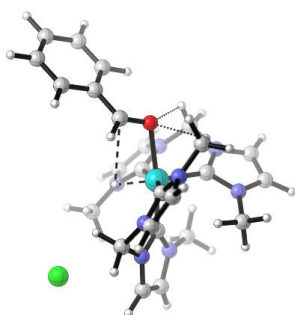

0 1

|    |           |           |           |
|----|-----------|-----------|-----------|
| Fe | 0.213453  | 0.115245  | 0.320308  |
| N  | 2.475313  | -1.512519 | -0.430543 |
| N  | 2.722754  | 0.404654  | -1.351711 |
| N  | 1.480868  | -2.183072 | 1.600446  |
| N  | 0.547482  | -1.029718 | 3.147488  |
| N  | 0.121320  | 3.053711  | 0.562322  |
| N  | 1.930707  | 2.376120  | 1.488764  |
| N  | -0.976594 | 2.205161  | -1.381475 |
| N  | -0.428727 | 0.541027  | -2.622811 |
| C  | 1.868039  | -0.291308 | -0.532495 |
| C  | 3.784554  | -0.393557 | -1.772907 |
| H  | 4.526191  | -0.033616 | -2.467594 |
| C  | 3.610816  | -1.608632 | -1.206066 |
| H  | 4.120241  | -2.547620 | -1.346399 |
| C  | 1.851435  | -2.613658 | 0.260611  |
| H  | 0.975402  | -2.938136 | -0.314946 |
| H  | 2.550529  | -3.448342 | 0.314119  |
| C  | 0.761154  | -1.034238 | 1.790786  |
| C  | 1.695901  | -2.868898 | 2.777513  |
| H  | 2.237396  | -3.801226 | 2.812925  |
| C  | 1.102453  | -2.143741 | 3.759567  |
| H  | 1.028265  | -2.317102 | 4.821702  |
| C  | -0.126984 | 0.041074  | 3.843477  |

|    |           |           |           |
|----|-----------|-----------|-----------|
| H  | -0.279859 | 0.853640  | 3.130329  |
| H  | 0.481112  | 0.392293  | 4.682903  |
| H  | -1.101106 | -0.281805 | 4.224756  |
| C  | 2.553115  | 1.759042  | -1.817282 |
| H  | 3.450387  | 2.351789  | -1.607407 |
| H  | 1.703532  | 2.212931  | -1.311804 |
| H  | 2.367556  | 1.778467  | -2.897561 |
| C  | 0.776357  | 1.887857  | 0.917281  |
| C  | 1.990988  | 3.760474  | 1.458771  |
| H  | 2.824010  | 4.311016  | 1.867657  |
| C  | 0.851535  | 4.191483  | 0.867058  |
| H  | 0.490008  | 5.188122  | 0.665750  |
| C  | -1.113729 | 3.021463  | -0.194081 |
| H  | -1.908003 | 2.614654  | 0.436818  |
| H  | -1.368910 | 4.040759  | -0.493075 |
| C  | -0.448131 | 0.935842  | -1.315070 |
| C  | -1.261286 | 2.587057  | -2.683493 |
| H  | -1.701832 | 3.540268  | -2.931856 |
| C  | -0.917112 | 1.528600  | -3.458973 |
| H  | -0.986508 | 1.386606  | -4.526159 |
| C  | 3.007520  | 1.537851  | 1.967854  |
| H  | 2.663678  | 0.503122  | 1.948823  |
| H  | 3.286165  | 1.818217  | 2.988019  |
| H  | 3.887505  | 1.623464  | 1.321426  |
| C  | 0.100405  | -0.734354 | -3.096829 |
| H  | -0.460479 | -1.054439 | -3.975693 |
| H  | 0.018858  | -1.492281 | -2.317179 |
| H  | 1.159724  | -0.658854 | -3.358247 |
| C  | -2.383801 | -0.634305 | 1.016057  |
| H  | -0.317379 | -1.236713 | -0.293674 |
| O  | -1.765245 | 0.441036  | 1.103195  |
| Cl | 1.742663  | -3.718488 | -2.652867 |
| H  | -1.888535 | -1.578495 | 1.305298  |
| C  | -3.755355 | -0.732862 | 0.547487  |
| C  | -4.394647 | -1.981162 | 0.547008  |
| C  | -4.440925 | 0.396957  | 0.072725  |
| C  | -5.701737 | -2.097041 | 0.093909  |
| H  | -3.849171 | -2.854659 | 0.897621  |
| C  | -5.745936 | 0.278564  | -0.377297 |
| H  | -3.921769 | 1.351677  | 0.060469  |
| C  | -6.378155 | -0.967504 | -0.365540 |
| H  | -6.193998 | -3.064788 | 0.091222  |
| H  | -6.277254 | 1.151141  | -0.746479 |
| H  | -7.399554 | -1.058036 | -0.724378 |

### Fe2-ncp-IM2-o

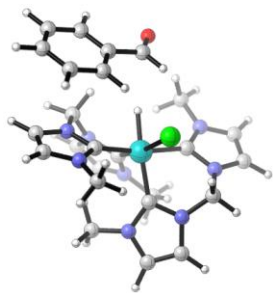

0 1

|    |           |           |           |
|----|-----------|-----------|-----------|
| Fe | -0.491599 | 0.035597  | -0.205878 |
| N  | -3.041087 | -0.958375 | -1.346412 |
| N  | -2.335724 | -2.408487 | 0.061817  |
| N  | -2.863711 | 1.412629  | -1.307685 |
| N  | -1.862219 | 2.741886  | 0.035813  |
| N  | 0.388238  | -0.061772 | 2.539822  |
| N  | -1.752441 | 0.109345  | 2.534326  |
| N  | 1.855684  | -1.171505 | 1.062508  |
| N  | 1.416660  | -2.333528 | -0.677180 |
| C  | -1.955499 | -1.221644 | -0.535180 |
| C  | -3.586079 | -2.835228 | -0.358706 |
| H  | -4.034081 | -3.750009 | -0.002690 |
| C  | -4.035912 | -1.914501 | -1.244051 |
| H  | -4.949467 | -1.867373 | -1.816605 |
| C  | -3.112437 | 0.252632  | -2.136544 |
| H  | -2.343678 | 0.213058  | -2.917330 |
| H  | -4.113100 | 0.332791  | -2.568517 |
| C  | -1.761953 | 1.481102  | -0.488290 |
| C  | -3.601242 | 2.582885  | -1.306442 |
| H  | -4.484877 | 2.717529  | -1.910495 |
| C  | -2.963711 | 3.422141  | -0.453623 |
| H  | -3.188334 | 4.435886  | -0.161120 |
| C  | -0.898261 | 3.321110  | 0.952678  |
| H  | 0.063346  | 3.487776  | 0.459179  |
| H  | -0.734274 | 2.648998  | 1.798300  |
| H  | -1.294489 | 4.270868  | 1.318098  |
| C  | -1.555295 | -3.109924 | 1.054617  |
| H  | -2.134534 | -3.245231 | 1.974460  |
| H  | -0.670710 | -2.512691 | 1.275766  |
| H  | -1.243194 | -4.093425 | 0.686980  |
| C  | -0.677239 | 0.041536  | 1.661268  |
| C  | -1.351177 | 0.058531  | 3.862170  |
| H  | -2.057201 | 0.107799  | 4.676485  |
| C  | -0.002402 | -0.054310 | 3.866047  |
| H  | 0.702418  | -0.120502 | 4.680223  |
| C  | 1.738401  | -0.116064 | 2.036671  |
| H  | 1.969185  | 0.839820  | 1.545085  |
| H  | 2.430085  | -0.301195 | 2.862256  |

|    |           |           |           |
|----|-----------|-----------|-----------|
| C  | 0.982584  | -1.220432 | -0.001235 |
| C  | 2.770211  | -2.207213 | 1.056939  |
| H  | 3.545432  | -2.306112 | 1.800790  |
| C  | 2.495153  | -2.936617 | -0.051483 |
| H  | 2.978280  | -3.812081 | -0.457194 |
| C  | -3.136049 | 0.246011  | 2.144885  |
| H  | -3.204683 | 0.157825  | 1.062110  |
| H  | -3.533049 | 1.223392  | 2.442264  |
| H  | -3.744407 | -0.538417 | 2.608017  |
| C  | 0.819943  | -2.834192 | -1.896425 |
| H  | 1.400690  | -2.525133 | -2.769983 |
| H  | -0.174231 | -2.398055 | -1.997130 |
| H  | 0.765333  | -3.926819 | -1.854609 |
| Cl | 0.040523  | 0.237198  | -2.652288 |
| O  | 2.293467  | 3.504838  | -0.041084 |
| C  | 2.329215  | 2.524670  | -0.774740 |
| H  | 1.584238  | 2.356699  | -1.581234 |
| H  | 0.588960  | 1.150764  | 0.024503  |
| C  | 3.388302  | 1.495317  | -0.688117 |
| C  | 4.414018  | 1.625670  | 0.255273  |
| C  | 3.370978  | 0.397945  | -1.556709 |
| C  | 5.418010  | 0.668401  | 0.329960  |
| H  | 4.398056  | 2.493197  | 0.911218  |
| C  | 4.382985  | -0.553710 | -1.483926 |
| H  | 2.538584  | 0.296856  | -2.254801 |
| C  | 5.404664  | -0.420387 | -0.544460 |
| H  | 6.219722  | 0.770622  | 1.057446  |
| H  | 4.370103  | -1.410053 | -2.154592 |
| H  | 6.193777  | -1.167107 | -0.491012 |

### Fe2-ncp-IM2-i

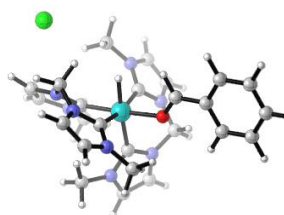

0 1

|    |           |           |           |
|----|-----------|-----------|-----------|
| Fe | -0.172477 | 0.007586  | 0.065463  |
| N  | -2.768974 | 1.310527  | 0.124878  |
| N  | -3.105545 | -0.797060 | 0.264439  |
| N  | -1.026506 | 2.675118  | 0.926320  |
| N  | 0.732995  | 2.180611  | 2.044104  |
| N  | 0.563171  | -2.630317 | 1.151504  |
| N  | -0.586075 | -1.621799 | 2.651657  |
| N  | 0.280107  | -2.598347 | -1.218456 |
| N  | -1.134915 | -1.492731 | -2.396188 |

|    |           |           |           |
|----|-----------|-----------|-----------|
| C  | -2.093208 | 0.125755  | 0.181190  |
| C  | -4.356259 | -0.184123 | 0.212487  |
| H  | -5.270135 | -0.756007 | 0.209270  |
| C  | -4.137358 | 1.146040  | 0.102733  |
| H  | -4.799861 | 1.973853  | -0.090870 |
| C  | -2.079454 | 2.562665  | -0.069910 |
| H  | -1.666843 | 2.584266  | -1.085319 |
| H  | -2.787473 | 3.385348  | 0.026521  |
| C  | -0.120501 | 1.665626  | 1.101715  |
| C  | -0.743512 | 3.776271  | 1.707650  |
| H  | -1.348130 | 4.669224  | 1.687872  |
| C  | 0.372483  | 3.468529  | 2.414558  |
| H  | 0.933210  | 4.038924  | 3.138221  |
| C  | 1.845573  | 1.451563  | 2.607223  |
| H  | 1.714678  | 0.394977  | 2.363247  |
| H  | 1.868562  | 1.582378  | 3.693066  |
| H  | 2.800199  | 1.789728  | 2.190684  |
| C  | -2.961111 | -2.230798 | 0.329349  |
| H  | -3.386024 | -2.625154 | 1.259682  |
| H  | -1.906095 | -2.492741 | 0.285655  |
| H  | -3.473924 | -2.703631 | -0.515456 |
| C  | -0.026345 | -1.408023 | 1.414051  |
| C  | -0.373965 | -2.912111 | 3.111729  |
| H  | -0.740409 | -3.252263 | 4.067839  |
| C  | 0.344943  | -3.555259 | 2.160727  |
| H  | 0.733940  | -4.561211 | 2.125235  |
| C  | 1.181061  | -2.907781 | -0.130949 |
| H  | 2.091357  | -2.308970 | -0.227529 |
| H  | 1.441073  | -3.967738 | -0.174546 |
| C  | -0.347763 | -1.376066 | -1.287306 |
| C  | -0.115443 | -3.448073 | -2.240486 |
| H  | 0.287969  | -4.440711 | -2.366919 |
| C  | -1.004930 | -2.739844 | -2.980429 |
| H  | -1.545260 | -3.006683 | -3.875145 |
| C  | -1.369579 | -0.631847 | 3.357640  |
| H  | -1.375133 | 0.279151  | 2.757420  |
| H  | -0.935755 | -0.424263 | 4.340716  |
| H  | -2.400908 | -0.974271 | 3.489359  |
| C  | -2.042748 | -0.456704 | -2.881484 |
| H  | -2.093159 | -0.499191 | -3.969960 |
| H  | -1.688067 | 0.527076  | -2.573496 |
| H  | -3.050162 | -0.578238 | -2.473713 |
| C  | 2.484999  | 0.699550  | -0.912293 |
| H  | -0.233267 | 1.012081  | -1.134271 |
| O  | 1.824091  | 0.015678  | -0.104514 |
| Cl | -3.752900 | 2.502274  | -2.696093 |
| H  | 1.946891  | 1.339326  | -1.632389 |

|   |          |           |           |
|---|----------|-----------|-----------|
| C | 3.931743 | 0.691663  | -0.940410 |
| C | 4.607453 | 1.463017  | -1.900887 |
| C | 4.679533 | -0.071628 | -0.023908 |
| C | 5.994540 | 1.468316  | -1.948310 |
| H | 4.027296 | 2.053446  | -2.606809 |
| C | 6.063985 | -0.061662 | -0.075195 |
| H | 4.146498 | -0.657284 | 0.721452  |
| C | 6.725952 | 0.706412  | -1.037175 |
| H | 6.509838 | 2.065854  | -2.694590 |
| H | 6.638172 | -0.650737 | 0.634705  |
| H | 7.811532 | 0.711218  | -1.073934 |

### Fe2-ncp-3

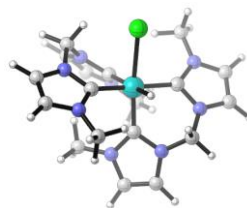

|     |           |           |           |
|-----|-----------|-----------|-----------|
| O 1 |           |           |           |
| Fe  | 0.076998  | -0.060650 | -0.641833 |
| N   | 1.396887  | 2.360852  | 0.189151  |
| N   | -0.366043 | 2.121901  | 1.394053  |
| N   | 2.884535  | 0.758636  | -0.703055 |
| N   | 2.859393  | -1.374914 | -0.575807 |
| N   | -1.553120 | -1.950968 | 0.952548  |
| N   | 0.137190  | -1.382518 | 2.137192  |
| N   | -2.812859 | -0.665212 | -0.595085 |
| N   | -2.547599 | 1.344789  | -1.276586 |
| C   | 0.321472  | 1.502190  | 0.358899  |
| C   | 0.257748  | 3.290139  | 1.810616  |
| H   | -0.142997 | 3.903197  | 2.602993  |
| C   | 1.370979  | 3.438503  | 1.055217  |
| H   | 2.130805  | 4.204679  | 1.054434  |
| C   | 2.375931  | 2.099250  | -0.834938 |
| H   | 1.881543  | 2.181056  | -1.814100 |
| H   | 3.196918  | 2.815107  | -0.744470 |
| C   | 2.007675  | -0.301425 | -0.645168 |
| C   | 4.210347  | 0.363716  | -0.690339 |
| H   | 5.030880  | 1.062090  | -0.744436 |
| C   | 4.188857  | -0.989209 | -0.614569 |
| H   | 4.994591  | -1.706188 | -0.586347 |
| C   | 2.435650  | -2.754414 | -0.457748 |
| H   | 1.408512  | -2.768753 | -0.093583 |
| H   | 3.102291  | -3.277586 | 0.235809  |
| H   | 2.438154  | -3.248564 | -1.431240 |
| C   | -1.588828 | 1.636995  | 1.988488  |

|    |           |           |           |
|----|-----------|-----------|-----------|
| H  | -1.477414 | 1.540922  | 3.074120  |
| H  | -1.817421 | 0.659121  | 1.567363  |
| H  | -2.426072 | 2.313580  | 1.780325  |
| C  | -0.390267 | -1.212403 | 0.871374  |
| C  | -0.667127 | -2.174358 | 2.942775  |
| H  | -0.401617 | -2.422441 | 3.958809  |
| C  | -1.740223 | -2.527858 | 2.195548  |
| H  | -2.593139 | -3.147103 | 2.427428  |
| C  | -2.482305 | -2.004771 | -0.158050 |
| H  | -2.001033 | -2.530792 | -0.992463 |
| H  | -3.395097 | -2.509184 | 0.168232  |
| C  | -1.824394 | 0.243080  | -0.891791 |
| C  | -4.083526 | -0.154705 | -0.789473 |
| H  | -4.977230 | -0.739720 | -0.636846 |
| C  | -3.913215 | 1.118918  | -1.220895 |
| H  | -4.633148 | 1.869503  | -1.507621 |
| C  | 1.361298  | -0.769768 | 2.597474  |
| H  | 1.737865  | -0.126474 | 1.801659  |
| H  | 2.115861  | -1.527478 | 2.835124  |
| H  | 1.177441  | -0.164614 | 3.491985  |
| C  | -1.947490 | 2.600563  | -1.665077 |
| H  | -2.554877 | 3.074366  | -2.439742 |
| H  | -0.947140 | 2.378744  | -2.046525 |
| H  | -1.859649 | 3.283900  | -0.811383 |
| H  | 0.332359  | 0.824484  | -1.926930 |
| Cl | -0.098031 | -1.957622 | -2.253287 |

### Fe2-cp-3

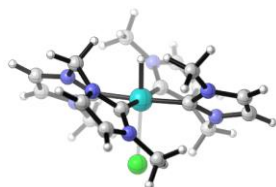

|     |           |           |           |
|-----|-----------|-----------|-----------|
| O 1 |           |           |           |
| Fe  | -0.016687 | 0.000018  | -0.072296 |
| N   | 2.656245  | -1.184447 | 0.271901  |
| N   | 1.519345  | -2.468332 | -1.009203 |
| N   | 2.656416  | 1.184106  | 0.271882  |
| N   | 1.519718  | 2.468122  | -1.009270 |
| N   | -2.637237 | -1.183934 | -0.628491 |
| N   | -1.583913 | -2.539577 | 0.646690  |
| N   | -2.637101 | 1.184269  | -0.628478 |
| N   | -1.583620 | 2.539774  | 0.646721  |
| C   | 1.397733  | -1.312612 | -0.271672 |
| C   | 2.787789  | -3.019501 | -0.913092 |
| H   | 3.059237  | -3.931852 | -1.421072 |
| C   | 3.512147  | -2.201067 | -0.112420 |

|    |           |           |           |
|----|-----------|-----------|-----------|
| H  | 4.536056  | -2.259872 | 0.222810  |
| C  | 3.010958  | -0.000190 | 1.027944  |
| H  | 2.448586  | -0.000143 | 1.968895  |
| H  | 4.088983  | -0.000267 | 1.205593  |
| C  | 1.397921  | 1.312449  | -0.271693 |
| C  | 3.512472  | 2.200587  | -0.112463 |
| H  | 4.536393  | 2.259238  | 0.222757  |
| C  | 2.788226  | 3.019136  | -0.913117 |
| H  | 3.059806  | 3.931447  | -1.421098 |
| C  | 0.478017  | 2.991152  | -1.863434 |
| H  | -0.172227 | 2.158945  | -2.143416 |
| H  | 0.925642  | 3.429496  | -2.758879 |
| H  | -0.120474 | 3.757921  | -1.357319 |
| C  | 0.477537  | -2.991242 | -1.863311 |
| H  | 0.925063  | -3.429646 | -2.758776 |
| H  | -0.172617 | -2.158955 | -2.143263 |
| H  | -0.121025 | -3.757933 | -1.357162 |
| C  | -1.429738 | -1.328632 | 0.017925  |
| C  | -2.816793 | -3.113179 | 0.380300  |
| H  | -3.110411 | -4.063257 | 0.799110  |
| C  | -3.490932 | -2.253318 | -0.421202 |
| H  | -4.482905 | -2.301864 | -0.842886 |
| C  | -2.905505 | 0.000188  | -1.406226 |
| H  | -2.242302 | 0.000157  | -2.282316 |
| H  | -3.952902 | 0.000253  | -1.718702 |
| C  | -1.429581 | 1.328826  | 0.017930  |
| C  | -3.490658 | 2.253767  | -0.421207 |
| H  | -4.482613 | 2.302448  | -0.842917 |
| C  | -2.816458 | 3.113494  | 0.380389  |
| H  | -3.109988 | 4.063575  | 0.799254  |
| C  | -0.574234 | -3.160130 | 1.479347  |
| H  | 0.081805  | -2.374246 | 1.860763  |
| H  | 0.005964  | -3.899407 | 0.912782  |
| H  | -1.057134 | -3.661171 | 2.321373  |
| C  | -0.573874 | 3.160177  | 1.479406  |
| H  | 0.006445  | 3.899382  | 0.912867  |
| H  | 0.082047  | 2.374193  | 1.860821  |
| H  | -1.056724 | 3.661274  | 2.321428  |
| H  | -0.196149 | 0.000026  | -1.622257 |
| Cl | 0.151539  | 0.000029  | 2.466390  |

### Fe2-ncp-IM3-o

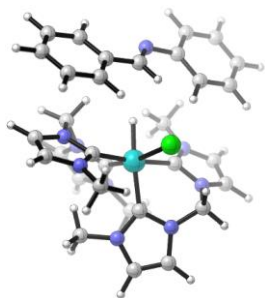

O 1

|    |           |           |           |
|----|-----------|-----------|-----------|
| Fe | 0.583420  | 0.470185  | -0.173328 |
| N  | 3.130630  | 1.216600  | -1.482876 |
| N  | 2.509609  | 2.871203  | -0.273591 |
| N  | 2.919466  | -1.109262 | -1.045901 |
| N  | 2.011975  | -2.106420 | 0.616438  |
| N  | -0.300130 | 0.919494  | 2.533500  |
| N  | 1.836366  | 0.702126  | 2.563038  |
| N  | -1.674175 | 1.969943  | 0.933582  |
| N  | -1.144348 | 2.917186  | -0.907773 |
| C  | 2.079597  | 1.625648  | -0.687545 |
| C  | 3.757888  | 3.194759  | -0.784036 |
| H  | 4.241926  | 4.135764  | -0.572911 |
| C  | 4.154845  | 2.144731  | -1.542035 |
| H  | 5.048401  | 1.989630  | -2.126955 |
| C  | 3.149509  | -0.109815 | -2.067559 |
| H  | 2.347652  | -0.178791 | -2.811601 |
| H  | 4.128349  | -0.282495 | -2.520980 |
| C  | 1.840783  | -1.015034 | -0.197351 |
| C  | 3.721431  | -2.202984 | -0.769166 |
| H  | 4.596138  | -2.447897 | -1.351589 |
| C  | 3.138834  | -2.835561 | 0.279131  |
| H  | 3.401915  | -3.749864 | 0.788451  |
| C  | 1.108125  | -2.479489 | 1.683970  |
| H  | 0.167113  | -1.949388 | 1.519892  |
| H  | 1.519539  | -2.204704 | 2.662848  |
| H  | 0.926064  | -3.557743 | 1.649842  |
| C  | 1.788940  | 3.720378  | 0.647026  |
| H  | 2.432047  | 4.002570  | 1.487223  |
| H  | 0.931735  | 3.163850  | 1.026265  |
| H  | 1.434372  | 4.631892  | 0.153748  |
| C  | 0.766618  | 0.693954  | 1.681059  |
| C  | 1.429359  | 0.910971  | 3.873871  |
| H  | 2.129838  | 0.937121  | 4.694083  |
| C  | 0.083613  | 1.055772  | 3.854224  |
| H  | -0.623590 | 1.229535  | 4.650270  |
| C  | -1.639567 | 1.004688  | 2.003129  |
| H  | -1.920857 | 0.024454  | 1.592195  |
| H  | -2.330609 | 1.306292  | 2.793934  |

|    |           |           |           |
|----|-----------|-----------|-----------|
| C  | -0.813198 | 1.834212  | -0.131609 |
| C  | -2.471031 | 3.094700  | 0.842906  |
| H  | -3.225173 | 3.336769  | 1.575558  |
| C  | -2.140406 | 3.687659  | -0.329835 |
| H  | -2.540521 | 4.565469  | -0.813441 |
| C  | 3.222793  | 0.521919  | 2.201792  |
| H  | 3.304720  | 0.507367  | 1.116198  |
| H  | 3.614291  | -0.423437 | 2.594975  |
| H  | 3.829452  | 1.344766  | 2.595015  |
| C  | -0.526185 | 3.238746  | -2.175472 |
| H  | -1.244743 | 3.119191  | -2.992139 |
| H  | 0.289971  | 2.536437  | -2.345187 |
| H  | -0.160182 | 4.271437  | -2.165778 |
| Cl | -0.014228 | -0.020849 | -2.571320 |
| C  | -2.647829 | -1.616787 | -0.753517 |
| H  | -0.546194 | -0.562334 | 0.168931  |
| N  | -2.596621 | -2.634104 | 0.036086  |
| H  | -1.979686 | -1.479920 | -1.614998 |
| C  | -3.621104 | -0.547117 | -0.574863 |
| C  | -4.578996 | -0.569348 | 0.450055  |
| C  | -3.594313 | 0.534974  | -1.467581 |
| C  | -5.498090 | 0.464519  | 0.569503  |
| H  | -4.583315 | -1.417731 | 1.129689  |
| C  | -4.523398 | 1.562513  | -1.349513 |
| H  | -2.818148 | 0.554704  | -2.233298 |
| C  | -5.478176 | 1.529452  | -0.334432 |
| H  | -6.245301 | 0.438974  | 1.359235  |
| H  | -4.497063 | 2.397871  | -2.045523 |
| H  | -6.206003 | 2.332349  | -0.244453 |
| C  | -1.593769 | -3.590188 | -0.173302 |
| C  | -0.460770 | -3.400769 | -0.988651 |
| C  | -1.719855 | -4.797308 | 0.532379  |
| C  | 0.490154  | -4.407966 | -1.099829 |
| H  | -0.298501 | -2.453120 | -1.501561 |
| C  | -0.760843 | -5.796831 | 0.419195  |
| H  | -2.592260 | -4.923018 | 1.168289  |
| C  | 0.352179  | -5.607333 | -0.400235 |
| H  | 1.364601  | -4.240255 | -1.725551 |
| H  | -0.880641 | -6.725665 | 0.971585  |
| H  | 1.105378  | -6.386210 | -0.491052 |

**Fe2-ncp-IM3-i**

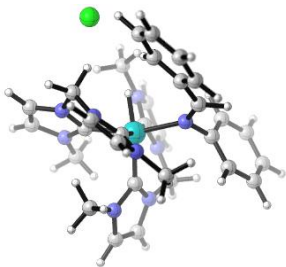

0 1

|    |           |           |           |
|----|-----------|-----------|-----------|
| Fe | 0.236463  | -0.231136 | 0.123978  |
| N  | -1.325367 | -2.692661 | 0.408588  |
| N  | 0.736204  | -3.253550 | 0.298658  |
| N  | -2.420678 | -0.786562 | 1.270845  |
| N  | -1.683107 | 1.000739  | 2.179598  |
| N  | 3.024840  | -0.041834 | 1.306029  |
| N  | 1.652191  | -0.676252 | 2.818046  |
| N  | 2.995217  | -0.381965 | -1.061469 |
| N  | 1.553204  | -1.213891 | -2.410254 |
| C  | -0.072220 | -2.138836 | 0.322592  |
| C  | -0.001342 | -4.428879 | 0.306704  |
| H  | 0.468186  | -5.398676 | 0.264506  |
| C  | -1.304115 | -4.070258 | 0.373636  |
| H  | -2.208067 | -4.657592 | 0.375604  |
| C  | -2.529762 | -1.894990 | 0.350940  |
| H  | -2.688064 | -1.569447 | -0.698614 |
| H  | -3.375433 | -2.519610 | 0.648393  |
| C  | -1.325112 | 0.032007  | 1.271265  |
| C  | -3.426526 | -0.332630 | 2.099478  |
| H  | -4.374968 | -0.838761 | 2.187347  |
| C  | -2.962115 | 0.802332  | 2.675659  |
| H  | -3.421647 | 1.482768  | 3.375147  |
| C  | -0.827970 | 2.085389  | 2.587089  |
| H  | 0.194107  | 1.831683  | 2.292236  |
| H  | -0.878640 | 2.220399  | 3.672285  |
| H  | -1.117611 | 3.026355  | 2.102581  |
| C  | 2.178755  | -3.249625 | 0.211024  |
| H  | 2.585284  | -2.418378 | 0.785605  |
| H  | 2.521565  | -3.157869 | -0.826054 |
| H  | 2.560041  | -4.185882 | 0.624461  |
| C  | 1.662933  | -0.188017 | 1.520095  |
| C  | 2.923745  | -0.830955 | 3.343493  |
| H  | 3.091758  | -1.199981 | 4.343312  |
| C  | 3.795605  | -0.437568 | 2.387675  |
| H  | 4.873341  | -0.387172 | 2.383427  |
| C  | 3.584828  | 0.350665  | 0.035404  |
| H  | 3.460396  | 1.426005  | -0.117750 |
| H  | 4.656426  | 0.133165  | 0.054413  |
| C  | 1.637349  | -0.591920 | -1.189911 |

|    |           |           |           |
|----|-----------|-----------|-----------|
| C  | 3.710241  | -0.836273 | -2.155063 |
| H  | 4.781744  | -0.736108 | -2.233888 |
| C  | 2.791773  | -1.364378 | -3.002249 |
| H  | 2.909656  | -1.834249 | -3.966192 |
| C  | 0.464861  | -1.106180 | 3.526547  |
| H  | -0.166001 | -1.705232 | 2.865795  |
| H  | -0.122608 | -0.256770 | 3.885218  |
| H  | 0.767897  | -1.709397 | 4.384233  |
| C  | 0.314601  | -1.691124 | -3.015755 |
| H  | 0.551870  | -2.137113 | -3.982607 |
| H  | -0.405794 | -0.882901 | -3.147168 |
| H  | -0.186079 | -2.428171 | -2.385203 |
| C  | -1.020052 | 2.556891  | -0.596566 |
| N  | 0.017922  | 1.783608  | -0.444596 |
| C  | -2.437194 | 2.218523  | -0.617346 |
| C  | -3.337684 | 3.161733  | -0.088330 |
| C  | -2.949841 | 1.073239  | -1.244851 |
| C  | -4.706579 | 2.929859  | -0.122796 |
| H  | -2.949931 | 4.078124  | 0.356801  |
| C  | -4.321695 | 0.856298  | -1.301889 |
| H  | -2.292126 | 0.347429  | -1.716950 |
| C  | -5.201247 | 1.772933  | -0.727110 |
| H  | -5.389497 | 3.659091  | 0.305523  |
| H  | -4.662254 | -0.041752 | -1.816741 |
| H  | -6.274055 | 1.601189  | -0.768651 |
| C  | 1.239869  | 2.487531  | -0.670052 |
| C  | 1.859839  | 2.387968  | -1.920117 |
| C  | 1.798032  | 3.308115  | 0.314122  |
| C  | 3.051127  | 3.063920  | -2.160794 |
| H  | 1.400801  | 1.763316  | -2.682033 |
| C  | 2.987892  | 3.988255  | 0.063904  |
| H  | 1.294665  | 3.407156  | 1.271711  |
| C  | 3.625878  | 3.859839  | -1.168637 |
| H  | 3.528640  | 2.973738  | -3.133017 |
| H  | 3.414752  | 4.623358  | 0.835511  |
| H  | 4.554577  | 4.388925  | -1.361346 |
| H  | -0.742749 | -0.517286 | -0.998966 |
| H  | -0.818043 | 3.628878  | -0.735572 |
| Cl | -2.986261 | -2.047429 | -2.863169 |

**Fe2-ncp-TS2-o**

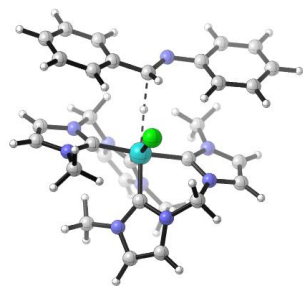

0 1

|    |           |           |           |
|----|-----------|-----------|-----------|
| Fe | 0.260466  | -0.615701 | -0.220394 |
| N  | -0.192070 | -3.269039 | -1.398988 |
| N  | 1.603330  | -3.364715 | -0.231516 |
| N  | -2.200218 | -2.082130 | -0.956960 |
| N  | -2.631966 | -0.825539 | 0.719322  |
| N  | 1.108713  | -0.034018 | 2.498509  |
| N  | -0.013574 | -1.860013 | 2.530466  |
| N  | 2.611492  | 0.767925  | 0.867173  |
| N  | 3.218144  | -0.107993 | -0.984823 |
| C  | 0.635911  | -2.470442 | -0.638191 |
| C  | 1.377019  | -4.640864 | -0.724503 |
| H  | 2.043623  | -5.463899 | -0.519199 |
| C  | 0.239392  | -4.581477 | -1.456349 |
| H  | -0.281710 | -5.339319 | -2.020518 |
| C  | -1.428460 | -2.764827 | -1.971778 |
| H  | -1.185075 | -2.058286 | -2.772016 |
| H  | -2.007350 | -3.610545 | -2.349682 |
| C  | -1.630180 | -1.115708 | -0.165756 |
| C  | -3.501545 | -2.373266 | -0.581351 |
| H  | -4.116977 | -3.081707 | -1.113517 |
| C  | -3.774022 | -1.563649 | 0.471193  |
| H  | -4.684487 | -1.412178 | 1.029872  |
| C  | -2.536026 | 0.168571  | 1.769071  |
| H  | -1.688162 | 0.821037  | 1.553452  |
| H  | -2.393790 | -0.310080 | 2.745832  |
| H  | -3.443991 | 0.776992  | 1.782022  |
| C  | 2.701893  | -3.052459 | 0.655442  |
| H  | 2.709644  | -3.743466 | 1.504631  |
| H  | 2.572691  | -2.035687 | 1.024150  |
| H  | 3.662114  | -3.122742 | 0.133855  |
| C  | 0.402829  | -0.868733 | 1.657009  |
| C  | 0.417954  | -1.623686 | 3.828058  |
| H  | 0.173526  | -2.289032 | 4.641314  |
| C  | 1.134112  | -0.475601 | 3.807228  |
| H  | 1.636647  | 0.064786  | 4.594026  |
| C  | 1.752227  | 1.140781  | 1.964796  |
| H  | 0.986296  | 1.835244  | 1.602668  |
| H  | 2.346035  | 1.622813  | 2.744417  |
| C  | 2.113166  | 0.040601  | -0.189895 |

|    |           |           |           |
|----|-----------|-----------|-----------|
| C  | 3.955772  | 1.053913  | 0.735385  |
| H  | 4.497020  | 1.652766  | 1.450926  |
| C  | 4.336326  | 0.504536  | -0.442864 |
| H  | 5.288395  | 0.510911  | -0.950172 |
| C  | -0.809062 | -3.019465 | 2.194763  |
| H  | -0.901415 | -3.092279 | 1.113724  |
| H  | -1.813316 | -2.945573 | 2.626773  |
| H  | -0.327640 | -3.927559 | 2.572344  |
| C  | 3.238229  | -0.805482 | -2.253599 |
| H  | 3.203033  | -0.095921 | -3.084943 |
| H  | 2.349978  | -1.432490 | -2.323144 |
| H  | 4.149102  | -1.408466 | -2.323106 |
| Cl | 0.087902  | -0.088994 | -2.630343 |
| C  | -0.483195 | 2.498144  | -0.553325 |
| H  | -0.161700 | 1.089988  | -0.076992 |
| N  | -1.465108 | 3.019265  | 0.185100  |
| H  | -0.676196 | 2.095171  | -1.556925 |
| C  | 0.845404  | 3.163650  | -0.480519 |
| C  | 1.143874  | 4.107725  | 0.508316  |
| C  | 1.810040  | 2.873461  | -1.453915 |
| C  | 2.388536  | 4.730474  | 0.537417  |
| H  | 0.367489  | 4.348476  | 1.230562  |
| C  | 3.048277  | 3.506652  | -1.431666 |
| H  | 1.565571  | 2.135901  | -2.218221 |
| C  | 3.345893  | 4.432867  | -0.432648 |
| H  | 2.607059  | 5.468371  | 1.306416  |
| H  | 3.786744  | 3.274583  | -2.196699 |
| H  | 4.312924  | 4.930147  | -0.416948 |
| C  | -2.755150 | 2.644455  | -0.126364 |
| C  | -3.126905 | 1.667934  | -1.083966 |
| C  | -3.796699 | 3.257934  | 0.607117  |
| C  | -4.462664 | 1.331603  | -1.271972 |
| H  | -2.363268 | 1.146582  | -1.659419 |
| C  | -5.126017 | 2.915823  | 0.409045  |
| H  | -3.513303 | 4.008205  | 1.341615  |
| C  | -5.474551 | 1.941927  | -0.530740 |
| H  | -4.715167 | 0.567838  | -2.006216 |
| H  | -5.900662 | 3.410255  | 0.991880  |
| H  | -6.515613 | 1.671711  | -0.687280 |

**Fe2-cp-TS2-o**

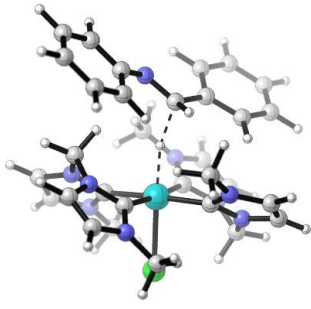

0 1

|    |           |           |           |
|----|-----------|-----------|-----------|
| Fe | -0.336110 | -0.981997 | 0.080628  |
| N  | -3.227450 | -0.424395 | 0.310018  |
| N  | -2.193542 | 0.747165  | 1.768480  |
| N  | -2.533277 | -0.992783 | -1.887727 |
| N  | -0.751208 | -0.540791 | -2.974718 |
| N  | 1.667879  | -0.917736 | 2.260981  |
| N  | -0.156804 | -1.652897 | 3.089162  |
| N  | 2.589918  | -1.334563 | 0.129935  |
| N  | 1.846751  | -2.633758 | -1.393576 |
| C  | -1.965484 | -0.181150 | 0.782948  |
| C  | -3.539600 | 1.042373  | 1.897667  |
| H  | -3.899705 | 1.772228  | 2.605667  |
| C  | -4.198094 | 0.306176  | 0.970499  |
| H  | -5.245254 | 0.249833  | 0.717737  |
| C  | -3.437530 | -1.319188 | -0.804195 |
| H  | -3.242733 | -2.349259 | -0.483996 |
| H  | -4.463924 | -1.204458 | -1.161423 |
| C  | -1.174636 | -0.852210 | -1.700380 |
| C  | -2.925400 | -0.765702 | -3.192210 |
| H  | -3.953762 | -0.839356 | -3.510505 |
| C  | -1.795864 | -0.483180 | -3.883132 |
| H  | -1.641023 | -0.247406 | -4.924237 |
| C  | 0.610337  | -0.230722 | -3.342018 |
| H  | 1.229301  | -0.335427 | -2.451915 |
| H  | 0.686386  | 0.795277  | -3.717187 |
| H  | 0.968745  | -0.916133 | -4.116958 |
| C  | -1.165149 | 1.370235  | 2.578119  |
| H  | -1.507040 | 2.362143  | 2.878747  |
| H  | -0.250399 | 1.477414  | 1.990066  |
| H  | -0.947780 | 0.778743  | 3.474350  |
| C  | 0.369039  | -1.178950 | 1.914480  |
| C  | 0.782861  | -1.665063 | 4.107280  |
| H  | 0.543945  | -2.011760 | 5.100476  |
| C  | 1.945828  | -1.207801 | 3.582129  |
| H  | 2.922177  | -1.069684 | 4.019166  |
| C  | 2.572873  | -0.424442 | 1.251296  |
| H  | 2.214636  | 0.551148  | 0.920243  |
| H  | 3.581246  | -0.320598 | 1.658045  |

|    |           |           |           |
|----|-----------|-----------|-----------|
| C  | 1.416314  | -1.696879 | -0.488685 |
| C  | 3.690195  | -2.005622 | -0.365929 |
| H  | 4.691209  | -1.824138 | -0.006569 |
| C  | 3.218678  | -2.823319 | -1.337746 |
| H  | 3.727620  | -3.522316 | -1.982813 |
| C  | -1.537991 | -2.042040 | 3.294136  |
| H  | -1.956831 | -2.350423 | 2.335241  |
| H  | -2.118724 | -1.214603 | 3.720427  |
| H  | -1.572827 | -2.889436 | 3.982003  |
| C  | 0.984670  | -3.378742 | -2.286038 |
| H  | 1.227777  | -3.154355 | -3.331117 |
| H  | -0.048976 | -3.119380 | -2.060532 |
| H  | 1.105723  | -4.450881 | -2.113893 |
| Cl | -1.179406 | -3.334911 | 0.243847  |
| N  | 1.407909  | 2.716883  | 0.133231  |
| C  | 2.732486  | 2.521227  | -0.195598 |
| C  | 3.228093  | 1.632699  | -1.179158 |
| C  | 3.689981  | 3.235092  | 0.559942  |
| C  | 4.593867  | 1.464986  | -1.375412 |
| H  | 2.534108  | 1.036156  | -1.764029 |
| C  | 5.050421  | 3.070719  | 0.351852  |
| H  | 3.316465  | 3.916226  | 1.320286  |
| C  | 5.519453  | 2.178963  | -0.615949 |
| H  | 4.938820  | 0.758279  | -2.128335 |
| H  | 5.756729  | 3.638502  | 0.953389  |
| H  | 6.585621  | 2.045137  | -0.775217 |
| C  | 0.451972  | 2.130685  | -0.584457 |
| H  | 0.653250  | 1.773937  | -1.608072 |
| H  | 0.233743  | 0.651316  | -0.123444 |
| C  | -0.917225 | 2.702064  | -0.457124 |
| C  | -1.934851 | 2.307781  | -1.332355 |
| C  | -1.197561 | 3.698632  | 0.483988  |
| C  | -3.209158 | 2.856189  | -1.242435 |
| H  | -1.717685 | 1.570636  | -2.100169 |
| C  | -2.470868 | 4.251895  | 0.573862  |
| H  | -0.386590 | 4.029712  | 1.126431  |
| C  | -3.486035 | 3.827364  | -0.282203 |
| H  | -3.985702 | 2.526000  | -1.930025 |
| H  | -2.670242 | 5.029317  | 1.308151  |
| H  | -4.480518 | 4.260712  | -0.211275 |

**Fe2-cpt-TS2-o**



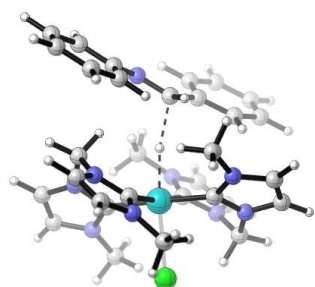

0 3

|    |           |           |           |
|----|-----------|-----------|-----------|
| Fe | -0.389735 | -1.075291 | 0.097837  |
| N  | -3.259553 | -0.340492 | 0.413519  |
| N  | -2.118501 | 0.860339  | 1.766354  |
| N  | -2.668681 | -0.968007 | -1.792977 |
| N  | -0.903714 | -0.570253 | -2.929377 |
| N  | 1.677977  | -0.901583 | 2.202632  |
| N  | -0.097555 | -1.682162 | 3.102766  |
| N  | 2.565394  | -1.318448 | 0.061912  |
| N  | 1.827667  | -2.693580 | -1.398207 |
| C  | -1.983852 | -0.124584 | 0.836207  |
| C  | -3.440572 | 1.233672  | 1.917807  |
| H  | -3.736962 | 2.027999  | 2.584185  |
| C  | -4.168402 | 0.476160  | 1.059622  |
| H  | -5.224984 | 0.458193  | 0.845014  |
| C  | -3.525444 | -1.270705 | -0.665485 |
| H  | -3.299420 | -2.290493 | -0.325541 |
| H  | -4.568326 | -1.172764 | -0.973049 |
| C  | -1.303895 | -0.893894 | -1.657962 |
| C  | -3.094302 | -0.683710 | -3.075963 |
| H  | -4.135284 | -0.692179 | -3.358764 |
| C  | -1.974545 | -0.439364 | -3.798647 |
| H  | -1.843857 | -0.182774 | -4.837934 |
| C  | 0.466152  | -0.315236 | -3.315550 |
| H  | 1.062383  | -0.244230 | -2.405464 |
| H  | 0.532009  | 0.629535  | -3.862446 |
| H  | 0.855396  | -1.121606 | -3.946185 |
| C  | -1.018471 | 1.451844  | 2.507724  |
| H  | -1.309912 | 2.453237  | 2.825806  |
| H  | -0.143218 | 1.532360  | 1.857368  |
| H  | -0.770597 | 0.847124  | 3.386481  |
| C  | 0.388903  | -1.246241 | 1.901636  |
| C  | 0.856803  | -1.594428 | 4.102603  |
| H  | 0.652934  | -1.902336 | 5.116043  |
| C  | 1.987133  | -1.106449 | 3.532753  |
| H  | 2.961173  | -0.896097 | 3.944930  |
| C  | 2.530462  | -0.376931 | 1.160151  |
| H  | 2.103521  | 0.565046  | 0.807543  |
| H  | 3.541040  | -0.208265 | 1.536405  |
| C  | 1.403016  | -1.754326 | -0.507668 |

|    |           |           |           |
|----|-----------|-----------|-----------|
| C  | 3.675592  | -1.953745 | -0.455196 |
| H  | 4.679459  | -1.703634 | -0.149877 |
| C  | 3.206591  | -2.826358 | -1.381952 |
| H  | 3.722837  | -3.522734 | -2.023632 |
| C  | -1.463313 | -2.115065 | 3.327512  |
| H  | -1.838990 | -2.564954 | 2.404353  |
| H  | -2.095059 | -1.269623 | 3.626167  |
| H  | -1.475518 | -2.863852 | 4.121591  |
| C  | 0.947263  | -3.520044 | -2.199416 |
| H  | 1.360379  | -3.624670 | -3.206957 |
| H  | -0.037891 | -3.054911 | -2.228188 |
| H  | 0.822082  | -4.503287 | -1.740790 |
| Cl | -1.337107 | -3.542875 | 0.230118  |
| N  | 1.518673  | 2.811638  | 0.049798  |
| C  | 2.825156  | 2.528268  | -0.263353 |
| C  | 3.273908  | 1.643209  | -1.278505 |
| C  | 3.826498  | 3.121013  | 0.544550  |
| C  | 4.625639  | 1.366307  | -1.448863 |
| H  | 2.551057  | 1.147300  | -1.921012 |
| C  | 5.171185  | 2.843842  | 0.364004  |
| H  | 3.494041  | 3.800610  | 1.325563  |
| C  | 5.590550  | 1.955576  | -0.632788 |
| H  | 4.929166  | 0.671130  | -2.230787 |
| H  | 5.906947  | 3.321474  | 1.007748  |
| H  | 6.645258  | 1.737275  | -0.774398 |
| C  | 0.533041  | 2.295028  | -0.685748 |
| H  | 0.711172  | 1.896601  | -1.695814 |
| H  | 0.219129  | 0.579397  | -0.203145 |
| C  | -0.820096 | 2.840705  | -0.517375 |
| C  | -1.873798 | 2.413618  | -1.341517 |
| C  | -1.093027 | 3.836344  | 0.434844  |
| C  | -3.152009 | 2.939265  | -1.207368 |
| H  | -1.672973 | 1.665890  | -2.105343 |
| C  | -2.372943 | 4.363705  | 0.568502  |
| H  | -0.265952 | 4.188195  | 1.045542  |
| C  | -3.413170 | 3.918367  | -0.247196 |
| H  | -3.948832 | 2.587138  | -1.860812 |
| H  | -2.558895 | 5.143450  | 1.304687  |
| H  | -4.411659 | 4.335672  | -0.144185 |

**Fe2-ncp-TS2-i**

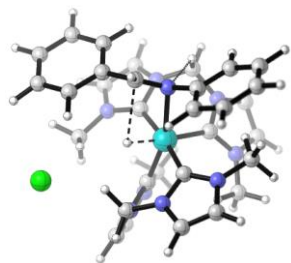

0 1

|    |           |           |           |
|----|-----------|-----------|-----------|
| Fe | -0.163577 | -0.336757 | 0.128002  |
| N  | 0.794564  | -2.422401 | -1.603488 |
| N  | 1.334338  | -2.939833 | 0.408933  |
| N  | -1.145661 | -1.382708 | -2.425277 |
| N  | -2.895776 | -0.900631 | -1.293424 |
| N  | -0.960723 | -0.184930 | 2.972949  |
| N  | -1.796313 | -1.984456 | 2.164549  |
| N  | 1.207295  | 0.665041  | 2.528099  |
| N  | 2.699384  | -0.011155 | 1.145974  |
| C  | 0.658580  | -1.978613 | -0.311451 |
| C  | 1.906098  | -3.893975 | -0.425577 |
| H  | 2.504172  | -4.705039 | -0.041358 |
| C  | 1.563441  | -3.562383 | -1.692657 |
| H  | 1.822365  | -4.005345 | -2.640850 |
| C  | 0.246104  | -1.673222 | -2.713540 |
| H  | 0.851478  | -0.764950 | -2.864491 |
| H  | 0.303903  | -2.284545 | -3.615968 |
| C  | -1.521450 | -0.831599 | -1.223559 |
| C  | -2.222298 | -1.763279 | -3.198723 |
| H  | -2.104403 | -2.202943 | -4.176769 |
| C  | -3.332576 | -1.443299 | -2.489616 |
| H  | -4.380463 | -1.542386 | -2.726999 |
| C  | -3.800183 | -0.545661 | -0.225149 |
| H  | -3.206564 | -0.240627 | 0.635920  |
| H  | -4.418253 | -1.409014 | 0.045261  |
| H  | -4.453223 | 0.280239  | -0.520359 |
| C  | 1.539053  | -2.932880 | 1.837363  |
| H  | 0.897523  | -2.174000 | 2.283750  |
| H  | 2.580450  | -2.695369 | 2.085435  |
| H  | 1.293154  | -3.911853 | 2.261527  |
| C  | -1.104829 | -0.854067 | 1.769350  |
| C  | -2.023759 | -2.015293 | 3.531958  |
| H  | -2.553970 | -2.824303 | 4.010394  |
| C  | -1.484448 | -0.885267 | 4.047890  |
| H  | -1.457814 | -0.509572 | 5.059221  |
| C  | -0.103252 | 0.977252  | 3.042751  |
| H  | -0.536683 | 1.775813  | 2.428238  |
| H  | -0.020724 | 1.306551  | 4.080851  |
| C  | 1.344919  | 0.148186  | 1.258904  |

|    |           |           |           |
|----|-----------|-----------|-----------|
| C  | 2.420281  | 0.808887  | 3.178799  |
| H  | 2.508826  | 1.228239  | 4.169111  |
| C  | 3.357324  | 0.381625  | 2.296341  |
| H  | 4.433176  | 0.348984  | 2.372801  |
| C  | -2.135987 | -3.073542 | 1.277436  |
| H  | -1.810391 | -2.804119 | 0.271693  |
| H  | -3.215301 | -3.257534 | 1.280002  |
| H  | -1.623330 | -3.993155 | 1.578520  |
| C  | 3.392015  | -0.521238 | -0.028987 |
| H  | 4.352419  | -0.011433 | -0.121203 |
| H  | 2.819826  | -0.324669 | -0.942094 |
| H  | 3.566514  | -1.599406 | 0.057489  |
| C  | 0.021759  | 2.657985  | -0.773346 |
| N  | -0.815309 | 2.006308  | -0.037795 |
| C  | 1.466611  | 2.721819  | -0.563788 |
| C  | 2.344658  | 2.415490  | -1.609429 |
| C  | 1.972142  | 3.173209  | 0.662547  |
| C  | 3.716590  | 2.522480  | -1.413597 |
| H  | 1.984117  | 1.990019  | -2.544074 |
| C  | 3.343081  | 3.324150  | 0.835690  |
| H  | 1.280182  | 3.417154  | 1.466541  |
| C  | 4.216881  | 2.994012  | -0.201035 |
| H  | 4.373570  | 2.189501  | -2.212612 |
| H  | 3.729946  | 3.685248  | 1.785469  |
| H  | 5.289959  | 3.097331  | -0.057685 |
| C  | -2.181857 | 2.252281  | -0.321219 |
| C  | -3.037629 | 2.564282  | 0.740107  |
| C  | -2.690598 | 2.226360  | -1.626075 |
| C  | -4.367316 | 2.892032  | 0.497306  |
| H  | -2.638587 | 2.569558  | 1.751963  |
| C  | -4.025368 | 2.538341  | -1.861507 |
| H  | -2.034653 | 1.929177  | -2.441586 |
| C  | -4.866770 | 2.885467  | -0.804496 |
| H  | -5.015879 | 3.155592  | 1.328356  |
| H  | -4.410059 | 2.508161  | -2.877602 |
| H  | -5.905716 | 3.139620  | -0.992997 |
| H  | 0.686743  | 0.139478  | -1.070434 |
| H  | -0.366300 | 3.270684  | -1.603848 |
| Cl | 3.088653  | -0.293488 | -3.459379 |

**Fe2-ncp-IM4-o**

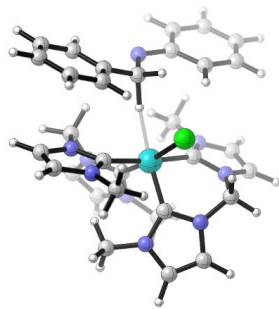

0 1

Fe -0.008253 -0.700997 -0.245212  
 N -1.234787 -3.090544 -1.374187  
 N 0.325364 -3.711396 -0.037217  
 N -2.757812 -1.281942 -1.160587  
 N -2.877507 0.116443 0.452989  
 N 0.774995 -0.248904 2.525538  
 N -0.891689 -1.595915 2.516558  
 N 2.580577 -0.097378 1.013377  
 N 3.002618 -1.248891 -0.736675  
 C -0.254069 -2.573397 -0.554577  
 C -0.270057 -4.865092 -0.524572  
 H 0.066454 -5.849590 -0.239651  
 C -1.257905 -4.472863 -1.363161  
 H -1.951442 -5.045243 -1.959260  
 C -2.180121 -2.238828 -2.077674  
 H -1.650688 -1.702398 -2.870922  
 H -2.975964 -2.866449 -2.484496  
 C -1.965283 -0.521017 -0.339173  
 C -4.107118 -1.112736 -0.896387  
 H -4.878564 -1.602241 -1.469830  
 C -4.176227 -0.212292 0.114625  
 H -5.023854 0.258224 0.588111  
 C -2.553545 1.060394 1.505253  
 H -1.509011 1.358688 1.410086  
 H -2.721036 0.606191 2.489570  
 H -3.168204 1.958303 1.396923  
 C 1.386856 -3.735245 0.945084  
 H 1.090869 -4.345194 1.804561  
 H 1.576272 -2.716095 1.278834  
 H 2.307535 -4.147402 0.519665  
 C -0.100993 -0.858627 1.654606  
 C -0.511487 -1.427185 3.840031  
 H -1.028225 -1.918225 4.649633  
 C 0.545735 -0.582124 3.846113  
 H 1.133526 -0.182129 4.657188  
 C 1.818997 0.610404 2.017765  
 H 1.371567 1.513853 1.588600  
 H 2.483124 0.899287 2.834916

C 1.955190 -0.695656 -0.055308  
 C 3.950974 -0.261961 0.988798  
 H 4.604331 0.188731 1.719083  
 C 4.216665 -0.988298 -0.123233  
 H 5.153724 -1.317054 -0.544329  
 C -2.003476 -2.444893 2.148781  
 H -2.039636 -2.544476 1.066591  
 H -2.951854 -2.016918 2.491557  
 H -1.881466 -3.437473 2.594285  
 C 2.886510 -1.985480 -1.978011  
 H 3.199926 -1.364258 -2.821831  
 H 1.840396 -2.246745 -2.134109  
 H 3.511753 -2.882707 -1.932201  
 Cl 0.185771 -0.251311 -2.628656  
 C 0.525825 2.395665 -0.609368  
 H 0.295454 1.258830 -0.259975  
 N -0.168838 3.301921 0.170573  
 H 0.221700 2.285504 -1.665615  
 C 2.022272 2.574021 -0.568068  
 C 2.632778 3.387790 0.390600  
 C 2.825768 1.940181 -1.523170  
 C 4.017421 3.544969 0.410664  
 H 1.986324 3.908052 1.093212  
 C 4.207431 2.106395 -1.510251  
 H 2.342360 1.313594 -2.272341  
 C 4.811260 2.905059 -0.539567  
 H 4.478073 4.188759 1.157300  
 H 4.817090 1.610342 -2.263729  
 H 5.890508 3.039267 -0.532969  
 C -1.483267 3.462903 -0.134162  
 C -2.209631 2.743010 -1.128756  
 C -2.233405 4.391229 0.641582  
 C -3.578295 2.925438 -1.290830  
 H -1.703814 2.002847 -1.746417  
 C -3.594761 4.563674 0.465127  
 H -1.691592 4.953978 1.398733  
 C -4.293980 3.823336 -0.498202  
 H -4.099415 2.339923 -2.048419  
 H -4.127446 5.281842 1.086576  
 H -5.363157 3.960210 -0.636623

**Fe2-ncp-IM4-i**

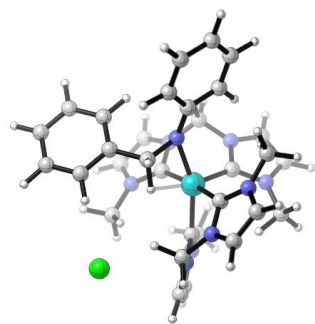

O 1

|    |           |           |           |
|----|-----------|-----------|-----------|
| Fe | -0.047502 | -0.557306 | 0.102252  |
| N  | 2.172739  | -2.073519 | -1.041712 |
| N  | 2.361900  | -2.160637 | 1.087094  |
| N  | 0.262661  | -2.019702 | -2.441705 |
| N  | -1.828497 | -2.042563 | -2.011839 |
| N  | -1.592228 | -0.839705 | 2.502218  |
| N  | -1.393863 | -2.779205 | 1.595108  |
| N  | -0.028174 | 0.935875  | 2.641832  |
| N  | 1.918739  | 1.142060  | 1.783264  |
| C  | 1.532590  | -1.685281 | 0.103169  |
| C  | 3.501579  | -2.748933 | 0.554425  |
| H  | 4.284386  | -3.149838 | 1.178212  |
| C  | 3.386491  | -2.676183 | -0.792499 |
| H  | 4.065068  | -2.946029 | -1.584939 |
| C  | 1.678294  | -1.717303 | -2.352984 |
| H  | 1.909783  | -0.656018 | -2.539217 |
| H  | 2.216526  | -2.297958 | -3.103336 |
| C  | -0.641445 | -1.591511 | -1.505101 |
| C  | -0.335580 | -2.693683 | -3.486723 |
| H  | 0.226152  | -3.086049 | -4.319576 |
| C  | -1.663067 | -2.707531 | -3.213850 |
| H  | -2.495998 | -3.121292 | -3.759912 |
| C  | -3.121163 | -1.853717 | -1.390568 |
| H  | -2.968709 | -1.590603 | -0.345141 |
| H  | -3.701193 | -2.778600 | -1.459840 |
| H  | -3.673626 | -1.038450 | -1.864545 |
| C  | 2.126932  | -2.048886 | 2.508537  |
| H  | 2.334736  | -3.005327 | 2.996416  |
| H  | 1.085278  | -1.777854 | 2.678836  |
| H  | 2.764901  | -1.279020 | 2.957718  |
| C  | -1.045872 | -1.461961 | 1.396007  |
| C  | -2.135411 | -2.948120 | 2.754572  |
| H  | -2.504227 | -3.913550 | 3.062992  |
| C  | -2.254797 | -1.728887 | 3.330966  |
| H  | -2.750938 | -1.417377 | 4.236538  |
| C  | -1.423381 | 0.578383  | 2.740593  |
| H  | -1.991595 | 1.147583  | 1.995811  |
| H  | -1.786522 | 0.811361  | 3.743883  |

|    |           |           |           |
|----|-----------|-----------|-----------|
| C  | 0.707022  | 0.565614  | 1.552703  |
| C  | 0.689813  | 1.729829  | 3.517336  |
| H  | 0.263775  | 2.137631  | 4.420461  |
| C  | 1.922028  | 1.859652  | 2.965835  |
| H  | 2.790229  | 2.408038  | 3.295432  |
| C  | -1.025126 | -3.865323 | 0.713631  |
| H  | -0.117024 | -3.588535 | 0.175904  |
| H  | -1.813744 | -4.074365 | -0.017242 |
| H  | -0.840989 | -4.766253 | 1.303151  |
| C  | 3.084456  | 1.034458  | 0.918122  |
| H  | 3.543696  | 2.017176  | 0.801132  |
| H  | 2.820691  | 0.680323  | -0.082496 |
| H  | 3.816767  | 0.340335  | 1.344291  |
| C  | -0.119180 | 1.412652  | -1.176338 |
| H  | -0.346054 | 1.373281  | -2.259593 |
| N  | -1.210361 | 1.014763  | -0.351255 |
| C  | 0.563809  | 2.714266  | -0.814110 |
| C  | 1.801170  | 3.032408  | -1.382493 |
| C  | -0.019268 | 3.591536  | 0.102702  |
| C  | 2.451028  | 4.208888  | -1.021671 |
| H  | 2.294796  | 2.326249  | -2.054199 |
| C  | 0.631303  | 4.771875  | 0.455426  |
| H  | -0.981580 | 3.334084  | 0.539611  |
| C  | 1.870112  | 5.081175  | -0.101999 |
| H  | 3.424030  | 4.430789  | -1.452645 |
| H  | 0.169068  | 5.451019  | 1.168037  |
| H  | 2.380045  | 5.999678  | 0.178389  |
| C  | -2.475682 | 1.399358  | -0.666525 |
| C  | -2.773547 | 2.353054  | -1.677268 |
| C  | -3.584110 | 0.911035  | 0.078507  |
| C  | -4.078444 | 2.757523  | -1.925026 |
| H  | -1.961437 | 2.797895  | -2.246124 |
| C  | -4.880636 | 1.327207  | -0.182131 |
| H  | -3.403685 | 0.153452  | 0.839982  |
| C  | -5.151798 | 2.254369  | -1.189996 |
| H  | -4.257546 | 3.491098  | -2.708623 |
| H  | -5.696153 | 0.914937  | 0.409772  |
| H  | -6.167617 | 2.580553  | -1.389850 |
| H  | 0.722088  | 0.627710  | -1.110910 |
| Cl | 3.978383  | 0.386855  | -2.288676 |

**Fe2-ncp-4**

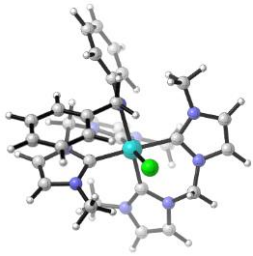

0 1

Fe -0.621223 -0.188722 -0.174155  
 N -3.258211 -1.580637 -0.132993  
 N -2.280834 -1.912435 1.735927  
 N -3.184731 0.200141 -1.733200  
 N -1.928634 1.849164 -2.250009  
 N 0.192690 1.077061 2.347911  
 N -1.851399 1.561957 1.934611  
 N 1.527531 -0.801038 1.803576  
 N 1.079876 -2.609737 0.766904  
 C -2.071949 -1.307349 0.507529  
 C -3.515660 -2.533608 1.813096  
 H -3.834200 -3.061229 2.698102  
 C -4.138266 -2.321915 0.632791  
 H -5.107939 -2.624612 0.270285  
 C -3.535056 -1.179741 -1.484909  
 H -2.959421 -1.809940 -2.173297  
 H -4.609254 -1.295070 -1.659344  
 C -1.955190 0.754842 -1.421355  
 C -3.855835 0.899971 -2.720237  
 H -4.818579 0.590701 -3.095899  
 C -3.064086 1.944673 -3.037236  
 H -3.200886 2.753601 -3.737155  
 C -0.821900 2.765208 -2.469744  
 H -0.522230 3.266650 -1.551183  
 H -1.151100 3.513785 -3.192737  
 H 0.039262 2.226918 -2.864139  
 C -1.354269 -1.963857 2.848968  
 H -1.918684 -2.184329 3.757062  
 H -0.851727 -1.007150 2.971863  
 H -0.596231 -2.740384 2.708864  
 C -0.783239 0.878065 1.394805  
 C -1.517983 2.200306 3.118544  
 H -2.228518 2.800821 3.664105  
 C -0.227051 1.893961 3.380595  
 H 0.423122 2.180908 4.191752  
 C 1.540179 0.581569 2.209083  
 H 2.093083 1.194252 1.487997  
 H 2.030583 0.649589 3.184161  
 C 0.739974 -1.281385 0.785335

C 2.319976 -1.774100 2.379110  
 H 3.023840 -1.559096 3.167841  
 C 2.039020 -2.917976 1.713317  
 H 2.449400 -3.911239 1.804537  
 C -3.131319 1.733384 1.285188  
 H -3.514167 0.773433 0.936196  
 H -3.045653 2.398846 0.419629  
 H -3.832844 2.164747 2.001559  
 C 0.497141 -3.632068 -0.081805  
 H 0.978647 -3.638564 -1.061568  
 H -0.560372 -3.419733 -0.238888  
 H 0.624230 -4.598865 0.412686  
 C 1.833782 0.431717 -1.936648  
 H 2.395992 1.196534 -2.500221  
 N 1.057990 1.059193 -0.874943  
 C 2.803371 -0.659648 -1.544273  
 C 2.867990 -1.836637 -2.300385  
 C 3.684145 -0.527727 -0.463448  
 C 3.786132 -2.839433 -1.998130  
 H 2.164249 -1.964738 -3.119765  
 C 4.607709 -1.525005 -0.161184  
 H 3.643447 0.374170 0.144719  
 C 4.665089 -2.686935 -0.928010  
 H 3.813915 -3.745016 -2.600602  
 H 5.285059 -1.395209 0.680810  
 H 5.386698 -3.465578 -0.692604  
 C 1.543092 2.254799 -0.431768  
 C 2.878661 2.723587 -0.659572  
 C 0.737364 3.166037 0.322287  
 C 3.350009 3.920318 -0.136730  
 H 3.572070 2.111226 -1.227128  
 C 1.226280 4.352454 0.848439  
 H -0.308832 2.922571 0.473747  
 C 2.546548 4.753171 0.641483  
 H 4.383478 4.199441 -0.337094  
 H 0.546484 4.985759 1.418211  
 H 2.926706 5.683387 1.052314  
 H 1.136165 -0.006466 -2.657207  
 Cl -0.550111 -1.656417 -2.236757

**Fe2-cp-4**

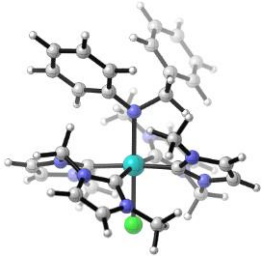

0 1

|    |           |           |           |
|----|-----------|-----------|-----------|
| Fe | 0.755119  | 0.479445  | -0.276824 |
| N  | -0.958647 | 2.764462  | -1.107528 |
| N  | -1.953126 | 0.995004  | -1.766570 |
| N  | 0.294696  | 3.168824  | 0.870239  |
| N  | 0.794901  | 1.821455  | 2.454374  |
| N  | 1.748487  | -2.095462 | -1.463117 |
| N  | 0.877462  | -0.944953 | -3.036717 |
| N  | 3.006792  | -1.425519 | 0.434354  |
| N  | 3.564141  | 0.530119  | 1.069090  |
| C  | -0.816036 | 1.394671  | -1.115203 |
| C  | -2.738359 | 2.060754  | -2.162519 |
| H  | -3.680667 | 1.918729  | -2.668256 |
| C  | -2.113047 | 3.186044  | -1.743257 |
| H  | -2.378729 | 4.227731  | -1.833232 |
| C  | -0.019746 | 3.653610  | -0.457869 |
| H  | 0.900462  | 3.702582  | -1.050151 |
| H  | -0.481761 | 4.639969  | -0.367525 |
| C  | 0.632101  | 1.859021  | 1.092983  |
| C  | 0.257361  | 3.913596  | 2.035855  |
| H  | 0.012607  | 4.964190  | 2.048389  |
| C  | 0.578784  | 3.058263  | 3.037447  |
| H  | 0.658260  | 3.215448  | 4.101786  |
| C  | 1.088191  | 0.615306  | 3.200708  |
| H  | 0.893965  | -0.236086 | 2.543613  |
| H  | 0.434884  | 0.556227  | 4.075788  |
| H  | 2.133209  | 0.598906  | 3.531822  |
| C  | -2.368176 | -0.383376 | -1.915382 |
| H  | -3.440734 | -0.459656 | -1.714162 |
| H  | -1.826030 | -0.956886 | -1.164853 |
| H  | -2.159049 | -0.760549 | -2.922490 |
| C  | 1.078507  | -0.913000 | -1.679869 |
| C  | 1.367037  | -2.104545 | -3.613379 |
| H  | 1.296290  | -2.290859 | -4.673405 |
| C  | 1.920178  | -2.834808 | -2.617966 |
| H  | 2.411794  | -3.795055 | -2.624220 |
| C  | 2.258655  | -2.497506 | -0.170912 |

|    |           |           |           |
|----|-----------|-----------|-----------|
| H  | 1.441552  | -2.799480 | 0.486226  |
| H  | 2.924858  | -3.350770 | -0.316925 |
| C  | 2.502224  | -0.155295 | 0.521444  |
| C  | 4.304282  | -1.535373 | 0.896790  |
| H  | 4.848264  | -2.466657 | 0.891072  |
| C  | 4.650252  | -0.294042 | 1.306516  |
| H  | 5.569986  | 0.082559  | 1.725557  |
| C  | 0.368167  | 0.151672  | -3.837490 |
| H  | 0.440715  | 1.068926  | -3.255153 |
| H  | -0.664644 | -0.028388 | -4.153281 |
| H  | 0.994632  | 0.261284  | -4.725335 |
| C  | 3.649857  | 1.959693  | 1.303878  |
| H  | 3.349587  | 2.218719  | 2.324962  |
| H  | 3.025217  | 2.475661  | 0.574863  |
| H  | 4.684758  | 2.272433  | 1.151805  |
| Cl | 2.270262  | 1.890263  | -1.707509 |
| N  | -0.724523 | -0.734344 | 0.822637  |
| C  | -0.732090 | -2.107797 | 1.002380  |
| C  | -0.685633 | -2.730431 | 2.281451  |
| C  | -0.792479 | -3.003595 | -0.098886 |
| C  | -0.661098 | -4.109845 | 2.435871  |
| H  | -0.655021 | -2.104654 | 3.171352  |
| C  | -0.757479 | -4.383428 | 0.060549  |
| H  | -0.838779 | -2.592527 | -1.102579 |
| C  | -0.690928 | -4.960139 | 1.328596  |
| H  | -0.606123 | -4.529953 | 3.438882  |
| H  | -0.802331 | -5.017659 | -0.823860 |
| H  | -0.675677 | -6.038871 | 1.453048  |
| C  | -1.657716 | -0.042127 | 1.707522  |
| H  | -1.614586 | -0.391011 | 2.758019  |
| H  | -1.406904 | 1.020613  | 1.742164  |
| C  | -3.095197 | -0.123620 | 1.234294  |
| C  | -3.743954 | 1.030299  | 0.786009  |
| C  | -3.798221 | -1.335678 | 1.181133  |
| C  | -5.038923 | 0.985035  | 0.273964  |
| H  | -3.204854 | 1.978247  | 0.816919  |
| C  | -5.092065 | -1.387547 | 0.671932  |
| H  | -3.320360 | -2.247182 | 1.532305  |
| C  | -5.717955 | -0.229176 | 0.210182  |
| H  | -5.515014 | 1.898553  | -0.076793 |
| H  | -5.618525 | -2.338271 | 0.637180  |
| H  | -6.729050 | -0.273217 | -0.186414 |

## 17. References

1. M. Vellakkaran, K. Singh and D. Banerjee, An Efficient and Selective Nickel-Catalyzed Direct N-Alkylation of Anilines with Alcohols, *ACS Catalysis*, 2017, **7**, 8152-8158.
2. M. Huang, Y. Li, Y. Li, J. Liu, S. Shu, Y. Liu and Z. Ke, Room temperature N-heterocyclic carbene manganese catalyzed selective N-alkylation of anilines with alcohols, *Chemical Communications*, 2019, **55**, 6213-6216.
3. T. Scherg, S. K. Schneider, G. D. Frey, J. Schwarz, E. Herdtweck and W. A. Herrmann, Bridged Imidazolium Salts Used as Precursors for Chelating Carbene Complexes of Palladium in the Mizoroki-Heck Reaction, *Synlett*, 2006, **2006**, 2894-2907.
4. D. Brenna, M. Villa, T. N. Gieshoff, F. Fischer, M. Hapke and A. Jacobi von Wangelin, Iron-Catalyzed Cyclotrimerization of Terminal Alkynes by Dual Catalyst Activation in the Absence of Reductants, *Angew. Chem., Int. Ed.*, 2017, **56**, 8451-8454.
5. S. Meyer, C. M. Orben, S. Demeshko, S. Dechert and F. Meyer, Synthesis and Characterization of Di- and Tetracarbene Iron(II) Complexes with Chelating N-Heterocyclic Carbene Ligands and Their Application in Aryl Grignard-Alkyl Halide Cross-Coupling, *Organometallics*, 2011, **30**, 6692-6702.
6. A. Singh, A. Maji, M. Joshi, A. R. Choudhury and K. Ghosh, Designed pincer ligand supported Co(ii)-based catalysts for dehydrogenative activation of alcohols: Studies on N-alkylation of amines,  $\alpha$ -alkylation of ketones and synthesis of quinolines, *Dalton Trans.*, 2021, **50**, 8567-8587.
7. H. S. Kunchur and M. S. Balakrishna, Platinum Assisted Tandem P-C Bond Cleavage and P-N Bond Formation in Amide Functionalized Bisphosphine *o*-Ph<sub>2</sub>PC<sub>6</sub>H<sub>4</sub>C(O)N(H)C<sub>6</sub>H<sub>4</sub>PPh<sub>2</sub>-*o*: Synthesis, Mechanistic, and Catalytic Studies, *Inorg. Chem.*, 2022, **61**, 857-868.
8. L. Homberg, A. Roller and K. C. Hultsch, A Highly Active PN<sub>3</sub> Manganese Pincer Complex Performing N-Alkylation of Amines under Mild Conditions, *Organic Letters*, 2019, **21**, 3142-3147.
9. D. Wu, Q. Bu, C. Guo, B. Dai and N. Liu, Cooperative catalysis of molybdenum with organocatalysts for distribution of products between amines and imines, *Molecular Catalysis*, 2021, **503**, 111415.
10. A. Singh, S. Gupta and J. M. Khurana, Zinc Chloride Mediated Nucleophilic Substitution: Amination and Thioetherification of Alcohols at Room Temperature, *Org. Prep. Proced. Int.*, 2020, **52**, 110-119.
11. J.-J. Ge, C.-Z. Yao, M.-M. Wang, H.-X. Zheng, Y.-B. Kang and Y. Li, Transition-Metal-Free Deacylative Cleavage of Unstrained C(sp<sup>3</sup>)-C(sp<sup>2</sup>) Bonds: Cyanide-Free Access to Aryl and Aliphatic Nitriles from Ketones and Aldehydes, *Org. Lett.*, 2016, **18**, 228-231.
